# Supplementary material for: The Amathus (Cyprus) Glass Workshop: Technology, Recycling, and Distribution of Glass in early Byzantine period
Source: Research Square preprint supplement (doi:10.21203/rs.3.rs-6294622/v1), 2025-04-14
Supplement: Supplementary file 1 [file a5493f0118f05e446d409e77.xlsx]

## Sheet: Overall table Amathus
				Major and minor elements derived from SEM-EDS																			Trace elements derived from LA-ICP-MS
	Compositional group	Type of glass	Sample	Na2O	MgO	Al2O3	SiO2	P2O5	SO3	Cl	K2O	CaO	TiO2	MnO	FeO	CoO	CuO	ZnO	SnO	BaO	PbO	Cr2O3	Li	B	P	Ti	V	Cr	Mn	Co	Ni	Cu	Zn	Ga	As	Se	Rb	Sr	Y	Zr	Nb	Mo	Ag	Cd	In	Sn	Sb	Cs	Ba
		Objects
	LEV	vessel with dec	AM77-28j	15.03	0.796	3.106	70.778	0.004	0.06	0.924	0.502	8.326	0.09	0.026	0.382
	LEV	vessel with dec	AM77-28j_dec	14.94	0.636667	3.02	68.6933	0.00666667	0.133333	0.936667	0.473333	7.56	0.1	0.0133333	0.4		2.78667	0.293333
	LEV	foot base disc	AM77-38a1	14.676	0.626	3.036	70.21	0.072	0.048	0.832	0.686	9.334	0.072	0.018	0.392
	LEV	vessel rim	AM77-38a2	14.8	0.578	3.16	70.448	0.022	0.076	0.794	0.426	9.198	0.078	0.016	0.4
	LEV	foot base disc	AM77-38a3	16.19	0.612	2.972	68.722	0.11	0.074	0.812	0.646	9.422	0.056	0.024	0.354
	LEV	stemmed lamp	AM77-38a4	14.604	0.576	3.168	70.59	0.018	0.08	0.824	0.436	9.158	0.11	0.03	0.408								3.44861	53.7807	179.705	432.924	7.58357	18.7396	161.989	1.26005	3.64267	2.16659	5.78958	3.61418	2.14464		6.94071	465.111	6.85337	40.1046	1.50845	0.150902	0.0184222	0.0172314	0.0170931	0.49606		0.0408471	217.471
	LEV	vessel body	AM77-38a5	14.358	0.708	3.272	70.244	0.016	0.048	0.94	0.388	9.504	0.088	0.02	0.412
	LEV	aqua window	AM77-38b3	14.938	0.532	3.178	70.672	0.004	0.06	0.818	0.392	8.8	0.11	0.024	0.474								0.583273	42.1034	162.491	529.999	10.1117	20.4911	150.255	1.32242	4.3411	2.16897	6.46722	3.76369	1.81308	0.0201274	6.32739	373.103	6.51716	45.6709	1.77498	0.181321	0.0203856	0.0168944	0	0.462633		0.00494219	205.343
	LEV	aqua window	AM77-38b4	11.487	0.783	3.112	72.026	0.066	0.041	0.65	0.993	10.15	0.088	0.089	0.515								0.935287	65.9253	498.459	450.937	11.8924	28.6253	701.948	2.90249	9.6013	78.1483	18.63	3.54827	2.18373		9.38199	485.399	6.65019	38.7355	1.44959	0.418115	0.122698	0.00803339	0	22.0408	12.6991	0.0478154	225.413
	LEV	foot base disc disc	AM77-39b1	15.627	0.55	3.144	70.246	0.004	0.05	0.934	0.76	8.195	0.088	0.024	0.378
	LEV	vessel body	AM77-39b2	15.76	0.57	3.118	70.756	0.006	0.054	1.012	0.508	7.68	0.088	0.035	0.42
	LEV	aqua window	AM77-39c2	15.39	0.858	2.956	69.34	0.09	0.068	0.928	0.782	8.964	0.088	0.038	0.49
	LEV	aqua window	AM77-39c3	14.29	0.676	2.886	68.542	0.1175	0.06	0.638	0.748	11.454	0.126	0.0425	0.454
	LEV	vessel with dec	AM77-42a	13.826	0.61	3.154	70.602	0.078	0.07	0.696	0.776	9.624	0.102	0.014	0.448
	LEV	vessel with dec	AM77-42a_dec	12.97	0.643333	3.17333	68.0733	0.08	0.143333	0.646667	0.936667	9.73667	0.113333	0.0433333	1.45	0.246667	0.433333				1.31333
	LEV	vessel rim	AM77-53b2	13.09	0.503333	2.965	74.95	0.0183333	0.025	0.831667	0.508333	6.655	0.0833333	0.0233333	0.346667
	LEV	vessel rim	AM77-53b3	13.002	0.498	2.964	75.05	0.012	0.03	0.856	0.488	6.65	0.084	0.028	0.338
	LEV	stemmed lamp	AM77-60a1	13.596	0.694	2.994	72.124	0.034	0.062	0.852	0.668	8.01	0.124	0.026	0.814								2.65267	79.4846	376.623	574.458	14.0018	18.4094	153.746	1.97147	5.53921	4.3043	11.3463	3.46147	2.32285		7.41786	373.483	6.53207	52.1229	1.82502	0.229037	0.0241673	0.00915011	0.00070666	0.804143	0.0246437	0.0553053	196.152
	LEV	stemmed lamp	AM77-60a2_1	14.7125	0.79	3.13875	70.5513	0.01125	0.03	0.9375	0.44	8.895	0.08875	0.0175	0.38375
	LEV	stemmed lamp	AM77-60a2_2	15.815	0.7775	3.01	68.4675	0.0075	0.0575	0.9725	0.425	9.945	0.085	0.0225	0.4175
	LEV	vessel with dec	AM77-60a3	14.666	0.648	3.184	71.628	0.008	0.078	0.81	0.486	7.942	0.094	0.018	0.43
	LEV	vessel with dec	AM77-60a3_dec	13.5667	0.644444	2.98111	67.3056	0.0533333	0.0622222	0.831111	0.525556	7.39778	0.0933333	0.0277778	0.647778	0.01	4.42222	0.182222	0.481111		0.768889
	LEV	vessel with dec	AM77-60a4	15.862	0.674	3.236	69.016	0.004	0.074	0.85	0.47	9.188	0.106	0.026	0.498
	LEV	vessel with dec	AM77-60a4_dec	14.8633	0.683333	3.13833	66.7883	0.0516667	0.103333	0.816667	0.516667	8.765	0.115	0.02	0.941667	0.0116667	2.715	0.0216667	0.178333		0.266667
	LEV	tip of distiller	AM77-60a6	13.816	0.892	3.078	72.204	0.008	0.076	0.736	0.446	8.222	0.076	0.032	0.418								3.20679	58.2295	164.612	457.966	8.34931	13.4334	129.172	1.27514	3.57027	2.02994	6.0334	3.43532	2.05179		7.00848	376.017	6.02658	44.9815	1.53342	0.215271	0.0264604	0.0169355	0	0.781453	0.271945	0.0563037	213.864
	LEV	vessel with dec	AM77-62a1	14.51	0.808	3.176	68.974	0.072	0.042	0.788	0.878	10.078	0.114	0.014	0.544
	LEV	vessel with dec	AM77-62a1_dec	13.952	0.866	3.324	68.554	0.104	0.064	0.8	0.886	10.058	0.126	0.048	1.032		0.188
	LEV	vessel with dec	AM77-62a2	15.772	0.728	3.062	69.602	0.038	0.048	0.968	0.514	8.612	0.12	0.018	0.516								3.38394	93.7711	349.334	519.817	12.1588	16.5783	168.388	1.95275	6.82888	6.2478	13.1256	3.52481	2.34387		7.11376	485.922	6.85431	40.1416	1.64222	0.490305	0.0221578	0.034424	0	0.921788	0.209	0.0372573	299.988
	LEV	vessel with dec	AM77-62a2_dec	15.032	0.768	3.224	68.054	0.042	0.088	0.88	0.646	9.204	0.114	0.068	1.644		0.24						3.40433	91.7909	367.278	544.429	15.1433	17.8139	448.517	451.255	140.591	1635.79	28.1077	6.74395	12.4655		7.93248	482.571	6.83113	40.0917	1.68594	3.87461	0.169097	0.0386347	0.549635	34.4002	2.52458	0.0471023	329.525
	LEV	vessel with dec	AM77-62a3	15.716	0.786	3.098	66.826	0.082	0.108	0.642	0.682	11.44	0.094	0.04	0.48
	LEV	vessel with dec	AM77-62a3_dec	15.486	0.816	3.216	66.572	0.058	0.126	0.672	0.766	10.944	0.118	0.068	1.098		0.062
	LEV	vessel with dec	AM77-62a4	15.704	0.736	3.084	69.59	0.042	0.052	0.962	0.512	8.638	0.106	0.034	0.536								2.43995	93.3501	341.768	517.242	12.1302	15.7666	167.119	1.88794	5.65065	6.71883	12.7148	3.54422	2.38482		7.05092	486.226	6.89277	40.6013	1.63401	0.508558	0.0251756	0.0279427	0	0.888034	4.76093	0.0411588	297.473
	LEV	vessel with dec	AM77-62a4_dec	15.05	0.762	3.192	67.978	0.058	0.08	0.89	0.626	9.21	0.114	0.066	1.782		0.196						1.98952	90.2434	374.473	542.571	15.1361	16.9941	434.602	515.394	157.703	1636.74	32.0732	7.33662	13.9374		8.17123	485.897	7.11439	41.6244	1.67646	4.07467	0.0548242	0.0398314	0.611465	34.9816	2.94636	0.0376611	327.233
	LEV	foot base disc blue	AM77-62a5	13.8262	0.84125	3.27875	67.49	0.14875	0.06	0.61375	0.94875	11.3875	0.10375	0.12	1.0075		0.18						5.71173	86.6823	752.645	602.165	15.369	21.558	966.541	465.328	127.86	1193.89	30.0581	5.36161	5.991		11.8249	545.499	7.97853	49.4369	1.97376	4.75747	0.146559	0.0261267	0.332343	23.9097	3.05339	0.108633	265.341
	LEV	stemmed lamp	AM77-62b1	14.506	0.748	3.0425	70.406	0.092	0.024	0.902	0.564	9.666	0.106	0.036	0.508
	LEV	stemmed lamp	AM77-62b3	14.676	0.6675	3.02	70.268	0.026	0.086	0.936	0.656	9.198	0.09	0.06	0.468
	LEV	vessel with dec	AM77-62c	15.302	0.838	3.206	67.518	0.064	0.02	1.01	0.566	10.866	0.09	0.016	0.506
	LEV	vessel with dec	AM77-62c_dec	12.5889	0.776667	2.91778	61.2256	0.17	0.00333333	0.731111	0.447778	10.1533	0.108889	0.237778	3.07889		1.47111				6.08667
	LEV	handle	AM78-109	14.764	0.444	2.696	71.648	0.024	0.05	0.802	0.886	8.312	0.05	0.048	0.274
	LEV	vessel with dec	AM78-604b	12.814	0.618	3.342	69.31	0.124	0.028	0.81	0.75	11.654	0.114	0.03	0.568
	LEV	vessel with dec	AM78-604b_dec	12.8867	0.61	3.16667	69.19	0.0833333	0.0733333	0.836667	0.733333	9.49	0.103333	0.166667	1.36667	0.116667	0.273333				0.896667
	LEV	stemmed lamp	AM78-605	13.4	0.62	3.2	70.996	0.148	0.062	0.664	0.99	9.328	0.114	0.02	0.462								3.54567	66.6343	637.11	499.853	10.8391	15.2261	158.141	2.11707	4.85158	10.3864	11.014	3.46832	2.61981		12.8874	442.156	7.20824	48.7669	1.66295	0.403958	0.0160023	0.0451905	0.000603333	1.49508	0.602545	0.10533	243.034
	LEV	foot base disc	AM78-608	14.354	0.676	3.236	70.62	0.0375	0.02	0.966	0.61	8.996	0.085	0.0175	0.422
	LEV	vessel body	AM78-609a	14.33	0.76	3.076	68.228	0.096	0.038	0.808	0.61	11.384	0.11	0.014	0.538
	LEV	vessel body	AM78-609b	14.298	0.766	3.078	68.244	0.11	0.028	0.814	0.618	11.408	0.094	0.036	0.504
	LEV	handle	AM79-23a	13.7	0.644444	2.99889	69.9244	0.0777778	0.03	0.875556	0.702222	10.4967	0.0822222	0.0233333	0.446667
	LEV	handle	AM79-23b	15.424	0.64	2.896	69.774	0.1	0.072	0.986	0.784	8.766	0.098	0.024	0.44
	LEV	vessel rim	AM79-540a	14.79	0.534	2.996	71.662	0.036	0.042	1.048	0.54	7.852	0.084	0.036	0.378
	LEV	vessel	AM79-540b	14.304	0.812	2.996	68.752	0.206	0.064	0.648	0.93	10.132	0.1	0.194	0.652		0.208
	LEV	vessel body	AM79-552	16.56	0.498	2.856	70.276	0.06	0.184	0.704	0.676	7.776	0.066	0.042	0.3
	LEV	foot base disc	AM83-16c	12.892	0.63	3.17	74.086	0.04	0.03	0.848	0.49	7.372	0.064	0.022	0.352
	LEV	vessel base	AM83-2th	14.818	0.628	3.128	69.23	0.11	0.072	0.694	0.808	9.988	0.102	0.018	0.4
	LEV	vessel with dec	AM83-34a	14.698	0.78	3.09	68.476	0.174	0.022	0.79	0.854	10.45	0.116	0.022	0.538
	LEV	vessel with dec	AM83-34a_dec	14.4025	0.7775	3.1225	67.6675	0.215	0.08	0.735	0.7925	10.2325	0.1125	0.1	0.855		0.255				0.5575	0.19
	LEV	vessel	AM83-56a	15.208	0.744	2.816	71.052	0.116	0.05	0.964	0.824	7.726	0.078	0.026	0.394
	LEV	vessel body	AM84-31a	13.456	0.594	3.162	71.262	0.142	0.05	0.696	0.92	9.112	0.11	0.026	0.466								2.9469	70.87	586.888	477.901	10.4509	15.1297	157.929	1.87946	4.73548	8.41597	9.98181	3.61638	2.27754		11.6611	419.144	6.99922	47.1391	1.58661	0.388237		0.0149036	0.00357782	1.00673	0.0324568	0.0884297	232.255
	LEV	foot base disc	AM84-4a1	12.638	0.578	3.09	72.008	0.098	0.038	0.866	0.612	9.524	0.108	0.024	0.41
	LEV	foot base disc	AM84-4a2	15.292	0.732	3.194	68.544	0.088	0.03	1.046	0.59	9.834	0.114	0.032	0.506
	LEV	stemmed lamp	AM84-4b1	15.046	0.652	3.11	68.15	0.096	0.072	0.688	0.818	10.81	0.106	0.016	0.436
	LEV	vessel base	AM84-4d	15.144	0.796	3.304	68.218	0.142	0.06	0.738	1.03	9.828	0.122	0.048	0.582								3.01288	100.826	590.997	538.758	12.0184	16.2038	245.595	3.13758	5.20891	17.1439	10.4523	3.92975	2.33578		13.5287	471.67	7.54663	52.4245	1.87993	0.537378		0.0784817	0.00275715	6.10663	1.09295	0.109215	223.957
	LEV	vessel rim	AM84-4e1	13.742	0.658	3.022	69.52	0.122	0.018	0.844	0.698	10.882	0.074	0.016	0.398
	LEV	vessel neck	AM84-4e2	15.108	0.642	2.904	69.714	0.102	0.048	0.978	0.842	9.122	0.096	0.024	0.41
	LEV	non diagnostic vessel	AM84-4e3	15.122	0.63	2.89	69.85	0.104	0.058	0.998	0.842	8.978	0.088	0.03	0.41
	LEV	vessel	AM84-4f2	15.146	0.642	2.928	69.74	0.084	0.058	0.966	0.852	9.03	0.098	0.028	0.432
	LEV	vessel with dec	AM84-4f5	14.16	0.686	3.194	69.458	0.11	0.03	0.858	0.714	10.182	0.104	0.04	0.466
	LEV	vessel with dec	AM84-4f5_dec	13.7125	0.7275	3.2475	68.47	0.0775	0.15	0.8425	0.7775	10.1025	0.0825	0.09	1.52		0.205
	LEV	vessel neck	AM84-66a	13.144	0.812	2.856	74.038	0.056	0.044	0.81	0.514	7.25	0.08	0.02	0.37
	LEV	vessel neck	AM84-66b	15.17	0.538	3	72.228	0.044	0.074	0.812	0.56	7.07	0.094	0.026	0.382
	LEV	vessel with dec	AM85-124c2	14.804	0.81	3.328	70.148	0.06	0.038	0.922	0.586	8.614	0.128	0.034	0.53
	LEV	vessel with dec	AM85-124c2_dec	12.0525	0.7425	2.7825	58.4625	0.1675	0.005	0.71	0.6025	9.0225	0.0875	0.08	2.8175		1.095		1.4175		9.9475
	LEV	vessel with dec	AM85-125.1	15.638	0.746	3.17	68.306	0.054	0.066	0.91	0.888	9.664	0.1	0.024	0.43
	LEV	vessel with dec	AM85-125.1_dec	15.31	0.772	3.22	68.446	0.078	0.096	0.884	0.76	9.442	0.088	0.036	0.646		0.23
	LEV	vessel base	AM85-125.2	14.684	0.754	3.062	68.144	0.106	0.038	0.832	0.518	11.19	0.106	0.028	0.532
	LEV	vessel base	AM85-125.3	15.292	0.634	2.876	69.65	0.084	0.058	0.994	0.87	9.032	0.082	0.03	0.394
	LEV	beaker	AM85-125a2	13.772	0.668	3.31	70.658	0.094	0.016	0.852	0.68	9.392	0.098	0.006	0.458
	LEV	beaker	AM85-125a3	15.474	0.804	3.222	66.922	0.058	0.108	0.676	0.702	11.394	0.124	0.022	0.494
	LEV	stemmed lamp	AM85-126-133-134.2	15.678	0.702	2.974	68.276	0.062	0.138	0.84	0.75	8.886	0.066	1.25	0.374
	LEV	stemmed lamp	AM85-126-133-134.3	15.332	0.612	3.07	68.834	0.086	0.084	0.7	0.814	9.896	0.116	0.036	0.428
	LEV	vessel body	AM85-149_1	14.522	0.746	3.14	68.894	0.112	0.026	0.864	0.712	10.228	0.12	0.074	0.562
	LEV	vessel	AM85-149_3	15.14	0.922	2.884	68.718	0.074	0.076	0.842	0.85	9.218	0.11	0.534	0.638								3.01633	119.513	495.995	558.084	17.0515	16.7058	3890.18	4.98402	9.5491	30.6914	17.4396	3.65357	3.61952		9.59078	554.887	6.94219	48.3208	1.82975	1.67583	0.105917	0.0371483	0	5.63087	44.5844	0.0789101	245.084
	LEV	vessel	AM85-149_5	13.338	0.736	3.334	68.686	0.098	0.042	0.9	0.72	10.252	0.106	0.21	0.834		0.192				0.552
	LEV	vessel blue	AM85-149_5	13.362	0.748	3.326	68.676	0.09	0.03	0.902	0.73	10.274	0.09	0.214	0.804		0.234				0.518
	LEV	vessel handle	AM88-89_25.4	13.672	0.682	3.034	69.764	0.078	0.098	0.636	0.822	10.548	0.118	0.02	0.528
	LEV	vessel amber	AM88-89_34a1	14.18	0.744	3.112	70.2	0.096	0.028	0.944	0.824	9.252	0.104	0.056	0.462								2.62307	109.635	522.531	414.133	9.06696	14.1514	320.301	2.17045	4.65462	13.0261	10.4569	3.70776	3.80263		10.3367	466.707	6.99045	38.2095	1.45719	0.523594	0.0524712	0.00400254	0.250222	5.30383	4.15531	0.0833747	229.877
	LEV	stemmed lamp	AM88-89_34a4	13.76	0.728	3.034	71.982	0.028	0.072	0.78	0.436	8.688	0.096	0.02	0.382
	LEV	vessel	AM88-89_34b1	15.086	0.636	2.882	69.98	0.074	0.058	0.996	0.84	8.938	0.092	0.02	0.396
	LEV	vessel	AM88-89_34b2	15.368	0.606	2.86	70.21	0.066	0.068	1.002	0.784	8.494	0.088	0.04	0.412
	LEV	vessel body	AM88-89_39.1	15.06	0.69	3.132	69.386	0.128	0.044	0.868	0.944	9.096	0.12	0.04	0.486
	LEV	vessel with dec	AM88-89_39.1_dec	14.696	0.678	3.198	69.326	0.142	0.034	0.824	1.072	9.39	0.098	0.02	0.522
	LEV	vessel body	AM88-89_39.2	15.228	0.76	3.134	66.696	0.112	0.058	0.784	0.754	11.838	0.094	0.042	0.5
	LEV	non diagnostic vessel	ΑΜ81-576a	13.8575	0.6925	3.1025	68.695	0.1025	0.075	0.6925	0.75	9.365	0.1175	0.0825	1.04	0.1375	0.305				0.9825		3.0095	76.2972	451.684	521.385	13.2611	20.848	463.191	851.336	234.864	2128.87	45.8319	7.88088	28.5536		10.3785	431.387	7.01502	48.1153	1.67901	7.94581	0.149933	0.07475	0.731748	170.185	21.6989	0.0766828	224.556
	LEV	non diagnostic vessel	ΑΜ81-576b	13.8275	0.68	3.0675	68.8325	0.125	0.0725	0.71	0.7425	9.41	0.1125	0.0575	1.0525	0.1	0.3				0.9175
	LEV	non diagnostic vessel	ΑΜ81-576c	13.91	0.695	3.11	68.795	0.1	0.0675	0.7025	0.755	9.3375	0.12	0.0675	1.05	0.1125	0.29				0.8875
	LEV	big bowl/bottle	ΑΜ81-586a	15.548	0.628	3.064	69.354	0.086	0.094	0.802	0.794	9.022	0.116	0.042	0.454								3.07046	82.9772	432.579	500.446	9.86701	15.6012	224.124	3.59466	6.17301	18.9329	9.7772	3.50905	2.48347	0.686246	9.81168	420.714	7.05179	52.2137	1.67551	0.47929	0.0905204	0.0233865	0.261942	2.13629	0.90209	0.0634363	225.55
	LEV	vessel body	ΑΜ81-591a	14.548	0.596	3.11	69.758	0.092	0.078	0.756	0.776	9.786	0.094	0.018	0.394
	LEV	vessel	ΑΜ81-593b	12.742	0.604	2.974	70.716	0.11	0.068	0.932	0.614	10.672	0.1	0.038	0.426
	LEV	foot base disc	ΑΜ82-114	14.612	0.6	3.098	69.75	0.098	0.032	0.916	0.572	9.716	0.098	0.032	0.474
	LEV	vessel body	ΑΜ82-119	14.446	0.676	2.892	68.62	0.124	0.056	0.62	0.74	11.206	0.112	0.022	0.488
	LEV	Objects	Mean	14.4843	0.690433	3.08422	69.4521	0.078644	0.0608611	0.832677	0.692741	9.41409	0.0990045	0.0610108	0.617338	0.105	0.775317	0.165741	0.692315		1.97456	0.19	2.88123	81.3008	428.539	510.769	12.0253	17.7809	525.985	136.104	43.2567	399.746	16.4294	4.35882	5.49006	0.353187	9.25674	456.817	6.94141	45.2177	1.67499	1.57967	0.0696528	0.0301804	0.162476	18.3265	6.63723	0.0636709	247.183
		Glassworking debris
	LEV	test drop	AM77-36a	14.726	0.9	2.74	72.302	0.016	0.056	0.814	0.578	7.386	0.088	0.014	0.382
	LEV	test drop	AM77-36b	13.572	1.618	2.666	71.066	0.014	0.042	0.61	0.514	9.376	0.108	0.008	0.406								4.07693	83.3542	200.948	496.943	9.13463	23.9151	133.378	1.42685	3.78449	2.41614	5.73523	3.12318	2.13652		7.6009	349.04	6.00439	51.3547	1.55005	0.385504	0.0395816	0.0221809	0.00317606	0.642807		0.0717386	191.725
	LEV	moil	AM77-37b	14.57	0.914	2.734	72.638	0.016	0.06	0.822	0.516	7.232	0.116	0.01	0.364
	LEV	cullet	AM77-37d	12.1	0.81	3.09667	71.3467	0.0666667	0.0233333	0.686667	0.96	10.1433	0.11	0.123333	0.53
	LEV	moil	AM77-42b1	14.41	0.99	2.72	72.488	0.01	0.052	0.788	0.526	7.528	0.102	0.012	0.378
	LEV	moil	AM77-42b2	13.88	1.402	2.696	71.618	0.012	0.048	0.706	0.518	8.6	0.116	0.022	0.394								4.44744	84.3732	167.595	488.275	8.91353	23.2981	128.548	1.32967	3.71861	2.38523	5.90713	3.05357	1.35488		7.62042	359.582	6.08073	50.7346	1.51235	0.39217	0.459448	0.0172967	0.0292617	0.632892		0.0688593	196.444
	LEV	moil	AM77-42b3	14.054	1.18	2.702	72.152	0.018	0.048	0.744	0.53	8.054	0.114	0.024	0.378
	LEV	test drop	AM77-42c1	12.8483	1.68667	2.69333	71.025	0.0133333	0.0416667	0.663333	0.508333	10.0133	0.0916667	0.0183333	0.4								5.39096	80.0535	183.994	522.59	9.31315	22.1924	134.203	1.3671	3.92516	3.16866	6.09675	3.02936	1.3231		7.69386	344.279	6.10254	53.9302	1.59751	0.343799	0.0363893	0.02071	0.000704877	0.642744		0.0669127	191.27
	LEV	test drop	AM77-42c2	15.23	0.76	2.754	72.196	0.03	0.072	0.884	0.592	7.02	0.082	0.012	0.37								2.68153	92.8749	183.01	459.559	8.61244	17.6787	133.146	1.17088	3.46649	4.57307	7.93706	3.03441	1.48717		8.48599	383.518	6.15558	48.7051	1.44464	0.569886	0.0548287	0.0400366	0	0.742114	0.039001	0.117034	203.903
	LEV	test drop	AM77-42c3	14.228	0.816	2.836	71.86	0.012	0.058	0.818	0.762	8.008	0.092	0.052	0.458								5.15396	89.0663	238.59	486.62	9.76925	19.2231	347.116	1.83396	4.75352	8.42138	9.5054	3.19052	1.59984		4.82622	407.058	6.31655	49.3287	1.53484	0.418783	0.0475731	0.0418213	0.00043446	2.07532	3.22129	0.0518359	212.509
	LEV	stick / drip	AM77-60a5	14.864	1.148	3.194	67.504	0.014	0.064	0.926	0.414	11.288	0.11	0.024	0.45
	LEV	cullet	AM84-4f1	11.406	0.764	3.124	72.57	0.092	0.036	0.662	1.006	9.666	0.1	0.074	0.508
	LEV	moil	AM84-55a	12.44	0.764	3.188	73.74	0.042	0.028	0.758	0.504	7.994	0.092	0.022	0.428								3.70698	42.1079	210.408	450.994	8.35451	15.5256	139.765	1.28367	3.78039	2.69182	8.1043	3.54381	1.57652		8.11572	382.661	6.52251	43.7711	1.5842	0.247809		0.0922864	0.00500043	0.598105		0.0804831	224.928
	LEV	moil	AM84-55b	12.456	0.682	3.19	73.98	0.042	0.026	0.75	0.48	7.862	0.098	0.024	0.406								3.57855	41.4262	212.979	455.129	8.29442	15.287	138.608	1.30019	3.6202	2.22971	6.20864	3.5382	1.56038		7.94947	388.651	6.51146	43.7782	1.54356	0.25761		0.0344322	0.00211188	0.574936		0.0765197	230.561
	LEV	amorphus glass	AM84-55d	14.088	0.486	3.02	73.112	0.04	0.04	0.838	0.62	7.29	0.066	0.036	0.366
	LEV	amorphus glass	AM84-55e	14.2	0.698	3.064	70.3	0.134	0.062	0.702	0.73	9.128	0.108	0.224	0.656
	LEV	amorphus glass	AM84-55e	14.2	0.698	3.064	70.3	0.134	0.062	0.702	0.73	9.128	0.108	0.224	0.656
	LEV	test drop	AM84-66c	14.628	0.448	3.184	73.268	0.06	0.056	0.882	0.56	6.38	0.074	0.016	0.446
	LEV	stick / drip?	AM88-89_103	15.016	1.138	3.188	67.482	0.03	0.052	0.918	0.404	11.19	0.108	0.024	0.456
	LEV	Glassworking debris	Mean	13.8377	0.942246	2.93968	71.6288	0.0418947	0.0487895	0.772316	0.602754	8.59404	0.0991404	0.0507193	0.443789								4.14805	73.3223	199.646	480.016	8.91313	19.5886	164.966	1.38747	3.86412	3.698	7.07064	3.21615	1.57691	#DIV/0!	7.47037	373.541	6.24197	48.8004	1.53817	0.373652	0.127564	0.0383949	0.00581278	0.844131	1.63015	0.0761976	207.334
	LEV	chunk and furnace wall	AM77-38d1_FW	12.03	0.795	3.06	71.58	0.125	0.075	0.725	0.95	9.98	0.065	0.115	0.505								0.427459	66.5907	437.146	442.334	11.3147	27.9469	693.413	3.03996	8.43342	74.6948	16.5482	3.50388	2.29432	0.281422	9.37879	481.372	6.62834	38.9618	1.39701	0.387132	0.121673	0.024282	0	19.8309	12.6692	0.0329377	226.81
	LEV	chunk and furnace wall	AM77-38d2_FW	11.805	0.855	3.125	71.205	0.08	0.07	0.69	0.91	10.475	0.125	0.095	0.545								0.289092	65.4421	433.751	438.264	11.1854	27.1879	660.639	2.63939	8.10781	81.6856	18.2452	3.56573	2.3954	2.36663	9.46361	485.118	6.6845	39.16	1.40404	0.389152	0.123407	0.360438	0	18.1809	12.0199	0.0392907	228.625
	LEV	chunk and furnace wall	AM77-38d3_FW	11.285	0.7725	3.105	72.38	0.1	0.06	0.6875	0.985	9.955	0.0725	0.115	0.485
	LEV	chunk and furnace wall	AM77-38d4_FW	12.7775	0.8475	3.17	70.6675	0.085	0.0575	0.6625	1.06	9.8225	0.11	0.1125	0.6325
	LEV	chunk and furnace wall	AM77-39_FW	11.4233	0.73	3.13	72.35	0.0666667	0.07	0.7	1.00333	9.84333	0.08	0.0833333	0.513333
	LEV	chunk and furnace wall	AM77-39d1_FW	12.2633	0.79	3.12667	71.2467	0.0633333	0.08	0.723333	0.913333	10.05	0.11	0.116667	0.52								4.73542	67.3793	452.497	453.671	11.5945	25.0549	735.401	3.29415	8.43545	80.7204	17.0295	3.47173	2.45752		9.32132	486.656	6.88285	41.0696	1.4665	0.427368	0.145701	0.0146411	0	22.0736	13.4129	0.267474	229.069
	LEV	chunk and furnace wall	AM77-39d2_FW	12.1833	0.816667	3.10333	71.3767	0.0933333	0.0566667	0.733333	0.913333	9.99333	0.11	0.0933333	0.533333								0.385817	67.9584	439.907	460.859	11.7356	29.1728	745.818	2.86578	9.49976	80.0499	16.9648	3.51851	2.26644		9.1127	490.769	6.92956	41.2943	1.45916	0.412281	0.144286	0.0225674	0	22.6861	13.0232	0.0294514	230.533
	LEV	chunk and furnace wall	AM77-39d3_FW	12.4267	0.813333	3.08667	71.1333	0.07	0.103333	0.733333	0.886667	10.02	0.0733333	0.11	0.556667								4.80035	70.6439	451.27	453.334	11.5943	27.404	753.173	3.30033	8.83023	82.4636	17.1529	3.5747	2.5474		9.18849	482.77	6.76421	40.776	1.45848	0.405114	0.15758	0.0317273	0	23.4383	13.5161	0.115568	226.137
	LEV	chunk and furnace wall	AM77-40-1_FW	13.72	0.688	3.008	70.87	0.046	0.158	0.872	0.738	9.314	0.08	0.048	0.458
	LEV	chunk and furnace wall	AM77-40-2_FW	10.6	0.763333	2.94333	72.72	0.113333	0.143333	0.533333	1.66667	9.96667	0.0833333	0.0533333	0.416667
	LEV	chunk and furnace wall	AM77-40-3_FW	11.94	0.81	3.076	70.738	0.066	0.058	0.636	1.002	10.922	0.102	0.108	0.544
	LEV	chunk and furnace wall	AM77-40c_FW	11.8	0.746	3.132	71.968	0.08	0.076	0.724	0.908	9.9	0.082	0.092	0.488
	LEV	chunk and furnace wall	AVERAGE	12.0212	0.785611	3.08883	71.5196	0.0823889	0.0839861	0.701694	0.994694	10.0202	0.0910972	0.0951806	0.516458	#DIV/0!							2.12763	67.6029	442.914	449.692	11.4849	27.3533	717.689	3.02792	8.66133	79.9229	17.1881	3.52691	2.39222	1.32402	9.29298	485.337	6.77789	40.2523	1.43704	0.404209	0.138529	0.0907312	0	21.242	12.9283	0.0969444	228.235
		Objects
	Serie 2.1	?	AM77-28n	18.396	0.956	2.188	65.526	0.076	0.182	0.874	0.624	8.248	0.138	1.938	0.86
	Serie 2.1	brown window	AM77-38b1	18.674	0.904	2.254	66.062	0.056	0.184	0.884	0.622	8.13	0.132	1.45	0.65								2.80433	183.526	305.207	680.621	22.0113	18.863	10303.9	4.25685	6.64128	29.353	15.2999	3.26879	3.9863		7.18308	578.57	6.92911	70.2966	2.18425	1.89982	0.0682719	0.0401877	0	5.41792	117.365		220.862
	Serie 2.1	brown window	AM77-38b2	17.98	1.036	2.51	66.428	0.104	0.17	0.85	0.782	7.242	0.198	1.926	0.778									143.842	541.137	863.612	29.0021	23.6501	13994.2	6.8953	14.3893	45.521	24.7039	3.89902	4.82997	16.8313	7.82185	645.246	7.03406	90.756	2.62062	8.96582	2.46864	0.170814	0	4.65486	74.3482		295.903
	Serie 2.1	vessel base	AM77-39a	18.17	0.95	2.16	65.752	0.054	0.176	0.88	0.626	8.288	0.152	1.946	0.85
	Serie 2.1	foot base disc	AM77-39b3	17.416	1.156	2.436	66.334	0.072	0.152	0.924	0.636	7.932	0.154	1.9	0.886
	Serie 2.1	aqua window	AM77-39c1	16.968	0.988	2.424	67.434	0.04	0.142	0.858	0.65	8.2	0.162	1.326	0.818								8.00937	145.145	349.18	756.006	24.8649	11.4112	10040.1	6.10552	12.7552	53.5716	22.1615	3.60985	5.08921		7.98623	678.295	7.83478	75.6802	2.45124	2.63864	0.599506	0.0596808	0	8.32404	257.485	0.137464	292.424
	Serie 2.1	foot base disc	AM77-53b1	17.706	1.134	2.554	66.652	0.138	0.178	0.83	0.864	7.326	0.162	1.598	0.864
	Serie 2.1	vessel base	AM77-53d	18.302	0.954	2.168	65.616	0.054	0.176	0.892	0.638	8.238	0.164	1.928	0.87
	Serie 2.1	vessel neck	AM77-62b2	16.948	1.076	2.448	67.882	0.124	0.162	0.784	0.876	6.932	0.156	1.806	0.808
	Serie 2.1	vessel rim	AM77-62b4	16.944	1.24	2.65	64.978	0.18	0.178	0.696	0.866	8.95	0.172	1.724	1.428
	Serie 2.1	vessel rim	AM77-62b5	18.316	1.078	2.382	65.272	0.092	0.168	0.814	0.784	8.56	0.156	1.496	0.888
	Serie 2.1	handle	AM77-62b6	17.354	1.164	2.496	65.556	0.128	0.1675	0.758	0.876	8.868	0.176	1.542	0.958
	Serie 2.1	star shaped profile	AM78-205	18.08	0.884	2.184	68.808	0.036	0.128	1.086	0.434	6.462	0.144	0.774	0.982								3.85799	162.197	256.279	738.748	25.4261	15.2061	5632.64	6.04284	14.1505	34.0391	37.0384	3.06086	32.2035		4.87663	479.811	7.64209	71.8592	2.29735	2.2234	0.155024	0.0768372	0.00913921	1.84685	1377.09	0.0457362	167.795
	Serie 2.1	vessel with dec	AM78-604a	19.68	0.828	2.192	65.298	0.084	0.168	0.984	0.566	7.154	0.218	1.43	1.392								6.04891	155.391	443.352	1011.15	45.6524	23.4962	10762.4	21.0255	16.6184	71.2041	29.5708	3.31393	9.17373		6.19792	527.668	8.93194	99.8591	2.46584	2.1834	0.11757	0.0621319	0.367882	9.76504	15.522	0.0608922	276.634
	Serie 2.1	vessel base	AM79-541	16.722	0.88	2.728	67.68	0.048	0.084	1.022	0.784	7.736	0.206	1.338	0.77
	Serie 2.1	stemmed lamp	AM83-2i1	19.312	1.21	2.512	64.43	0.114	0.178	0.912	0.692	7.858	0.146	1.656	0.988
	Serie 2.1	foot base disc	AM83-2i2	19.012	1.046	2.39	65.846	0.112	0.146	1.074	0.618	7.476	0.144	1.446	0.684
	Serie 2.1	vessel body	AM83-39	16.502	0.856	3.062	67.318	0.108	0.09	0.95	0.794	7.898	0.248	0.86	1.31
	Serie 2.1	stemmed lamp	AM83-56c	18.094	1.17	2.71	64.912	0.094	0.176	0.64	0.728	8.904	0.18	1.458	0.93
	Serie 2.1	handle	AM84-31b	17.452	0.938	2.456	66.826	0.118	0.156	0.842	0.774	8.202	0.164	1.15	0.92
	Serie 2.1	small vessel	AM84-4b2	17.158	1.066	2.576	66.022	0.136	0.128	0.786	0.928	8.678	0.16	1.512	0.85
	Serie 2.1	vessel	AM84-4f4	17.344	1.098	2.476	66.6	0.098	0.154	0.804	0.638	8.23	0.16	1.62	0.78
	Serie 2.1	beaker	AM85-125a1	17.658	1.146	2.536	65.714	0.124	0.14	0.8	0.844	8.514	0.14	1.444	0.93
	Serie 2.1	stemmed lamp	AM85-126-133-134.1	17.296	1.096	2.556	67.348	0.16	0.136	0.846	0.91	8.014	0.152	0.572	0.91								3.00534	141.532	743.825	749.592	22.341	20.3425	4328.63	13.1576	13.1457	71.5431	25.142	3.48432	5.5657		8.45154	537.585	7.01581	68.283	2.22253	1.60849	0.306347	0.0449177	0	9.75995	56.7783	0.0720238	227.988
	Serie 2.1	green window	AM85-135	17.962	1.188	2.608	66.564	0.148	0.166	0.872	0.812	6.51	0.164	1.062	1.948								4.08973	185.819	784.005	829.617	47.4268	17.7804	7712.66	18.5366	23.2205	75.4715	35.8337	3.90339	13.0505		8.20906	532.645	9.48882	81.4864	2.53285	2.55302	0.129074	0.0442519	0	4.00307	30.8462	0.119762	203.361
	Serie 2.1	foot base disc	AM85-149_2	17.15	1.074	2.448	67.84	0.134	0.162	0.782	0.84	6.794	0.17	1.828	0.79									173.92	644.825	746.155	28.1037	17.816	13249.8	5.82963	15.7765	37.2087	23.9376	3.62581	5.76023	10.81	8.27587	599.34	6.78074	79.2769	2.31047	5.00455	0.041584	0.0979504	0	3.60966	109.15	0.0107345	298.338
	Serie 2.1	foot base disc	AM85-149_4	17.572	1.434	2.586	64.308	0.11	0.158	0.79	0.776	9.066	0.176	1.846	1.172								0.312619	193.223	589.697	837.984	39.165	20.2266	13543.5	13.6156	27.1985	59.5803	37.2411	4.04723	9.73692	12.9784	7.23113	825.249	8.28413	79.679	2.72743	4.95283	0.0652001	0.0697415	0	6.34987	257.342		289.717
	Serie 2.1	vessel base	AM88-89_25.1	18.208	1.186	2.538	65.092	0.16	0.174	0.734	0.87	8.556	0.178	1.328	0.974								7.27451	164.512	703.699	826.282	29.9368	18.1103	9556.43	15.0628	19.8552	90.3464	38.0812	3.72158	7.10562		6.99361	743.071	7.761	78.8505	2.62712	4.06293	0.455989	0.0411796	0	25.6848	116.051	0.0935492	264.964
	Serie 2.1	vessel neck	AM88-89_25.2	17.236	1.352	2.674	64.292	0.158	0.16	0.836	0.774	8.92	0.178	1.808	1.612								7.31971	175.525	821.56	927.473	46.4212	20.4961	13281.2	9.09794	24.9725	60.4678	35.9493	4.11454	11.6152		8.29465	709.739	9.51682	91.915	3.05266	5.67631	0.096762	0.0532189	0	5.35126	154.377	0.150873	245.521
	Serie 2.1	beaker	AM88-89_25.3	17.574	1.056	2.36	66.2	0.122	0.148	0.892	0.688	8.146	0.164	1.524	1.122
	Serie 2.1	foot base disc	AM88-89_34a3	17.736	1.079	2.411	65.888	0.099	0.16	0.911	0.686	8.225	0.163	1.483	1.157
	Serie 2.1	vessel base	ΑΜ81-587a	16.248	1.288	2.466	69.28	0.032	0.1	1.014	0.458	6.108	0.19	1.79	1.02
	Serie 2.1	vessel body	ΑΜ81-593a	16.582	1.25	2.684	65.592	0.158	0.162	0.804	0.904	8.89	0.206	1.69	1.08
	Serie 2.1	vessel body	ΑΜ82-95b	18.648	0.986	2.442	67.558	0.074	0.132	1.11	0.622	6.474	0.174	0.962	0.82
	Serie 2.1	Objects	Mean	17.7176	1.08079	2.47838	66.262	0.104265	0.154162	0.868676	0.734824	7.93321	0.169029	1.50474	0.994088								4.74695	165.876	562.07	815.203	32.7592	18.8544	10218.7	10.8751	17.1567	57.1188	29.5418	3.64085	9.8288	13.5399	7.41105	623.383	7.92903	80.722	2.49931	3.7972	0.409452	0.0691738	0.0342747	7.70612	233.305	0.0863795	253.046
		Glass chunks
	Serie 2.1	cullet	AM83-16b	16.958	1.102	2.654	66.47	0.17	0.156	0.732	0.964	8.288	0.13	1.136	1.078		0.154						2.33228	135.258	757.105	769.252	29.5005	16.1703	8365.28	14.4294	17.9119	947.418	105.564	3.58486	8.91106		7.6942	603.09	8.08684	73.6728	2.30281	2.44053	10.8093	0.110466	0	464.509	68.6077	0.0524608	267.581
	Serie 2.1	cullet	AM84-55c	14.996	1.032	2.428	61.208	0.156	0.046	0.734	0.746	8.686	0.134	0.708	0.93		0.348		0.746		7.094		4.3656	117.021	695.451	799.286	33.2056	23.8311	5499.33	12.446	20.1369	2412.67	198.327	3.78052	19.6335		6.45548	589.287	8.55466	62.9801	2.44846	2.7175	5.65481	0.0775546	0	4340.25	81.2196	0.0767523	227.829
	Serie 2.1	cullet	AM83-16a	16.932	1.124	2.494	65.41	0.17	0.12	0.814	0.776	8.164	0.158	0.984	1.018		0.236				1.602		2.70495	137.978	683.157	770.149	26.8342	17.4717	7253.03	13.307	17.5603	1606.84	184.227	3.57916	11.3638		7.48803	583.224	7.78302	140.698	2.2771	2.18996	10.0289	0.0838295	0	1348.83	70.0603	0.0602376	251.228
	Serie 2.1	Glassworking debris	Mean	16.2953	1.086	2.52533	64.3627	0.165333	0.107333	0.76	0.828667	8.37933	0.140667	0.942667	1.00867		0.246		0.746		4.348		3.13428	130.086	711.904	779.562	29.8468	19.1577	7039.21	13.3941	18.5363	1655.64	162.706	3.64818	13.3028	#DIV/0!	7.21257	591.867	8.14151	92.4504	2.34279	2.44933	8.831	0.0906168	0	2051.2	73.2959	0.0631503	248.879
	Serie 2.1 ?	vessel rim	AM79-540c	17.68	1.274	2.294	67.562	0.118	0.172	0.626	1.052	7.79	0.268	0.18	0.988
	Plant ash	foot base disc	AM84-4a3	15.504	1.496	2.898	66.95	0.274	0.134	0.728	1.122	7.348	0.208	1.792	1.548
	Plant ash	small vessel	AM84-4b3	16.742	1.976	1.708	67.528	0.876	0.116	1.064	1.978	5.734	0.152	1.274	0.854								3.75501	180.459	3576.56	807.218	23.1181	12.3923	9336.57	12.9367	15.2941	116.912	47.9188	2.66309	3.86227		6.46454	466.798	5.03349	68.6416	2.3613	2.24195		0.0730458	0.00239257	9.27846	207.346	0.0591336	257.75
	Plant ash	vessel	AM84-4c	18.082	1.41	2.39	64.416	0.212	0.182	0.75	1.074	8.754	0.17	1.72	0.848								4.66683	178.858	863.022	784.634	33.1118	16.4623	12384.2	8.6391	16.2693	56.4354	28.21	3.64843	3.91939		7.18465	751.749	7.28466	78.2739	2.45616	4.75085		0.113392	0.0202347	5.17469	35.237	0.0707682	253.581
	Plant ash	vessel rim	AM84-4f3	15.92	1.412	2.724	66.194	0.226	0.162	0.734	0.98	8.25	0.186	2.158	1.054
	Plant Ash (PA)	Objects	Mean	16.7856	1.5136	2.4028	66.53	0.3412	0.1532	0.7804	1.2412	7.5752	0.1968	1.4248	1.0584								4.21092	179.658	2219.79	795.926	28.1149	14.4273	10860.4	10.7879	15.7817	86.6735	38.0644	3.15576	3.89083	#DIV/0!	6.82459	609.273	6.15908	73.4578	2.40873	3.4964	#DIV/0!	0.0932188	0.0113137	7.22657	121.292	0.0649509	255.666
	HIMT	vessel rim	AM79-534d	17.988	1.122	2.964	65.45	0.048	0.122	0.942	0.614	6.482	0.548	2.096	1.622
	HIMT	vessel base	AM79-539	16.388	1.276	3.49	65.168	0.164	0.122	0.814	0.516	5.098	0.688	1.92	4.356
	HIMT	handle	ΑΜ81-587b	18.642	1.292	2.828	63.656	0.19	0.118	1.084	0.58	5.976	0.552	1.804	3.28
	HIMT	vessel with dec	AM83-34b	17.818	0.904	2.934	66.65	0.16	0.122	0.936	0.422	4.94	0.378	1.724	3.018								4.93897	186.537	646.651	1837.77	94.3559	46.6724	12789.6	11.613	30.0385	76.3004	38.6	4.69596	19.517		6.17157	387.593	12.829	159.698	3.878	3.07593		0.0995835	0.146384	1.38696	0.360218	0.0792376	249.719
	HIMT	vessel with dec	AM83-34b_dec	17.79	0.885	2.895	66.59	0.095	0.26	0.955	0.405	4.97	0.375	1.745	3							0.03	5.08413	185.914	639.276	1817.21	92.8046	46.6886	12370.1	11.2833	29.1086	98.5094	37.7476	4.62486	18.9809		6.01489	385.27	12.4685	157.28	3.77513	3.09593		0.0636484	0.0287517	1.91265	0.24447	0.0810773	242.503
	HIMT	vessel green	AM83-47	16.49	0.918	3.158	66.892	0.086	0.088	0.928	0.792	7.922	0.316	0.992	1.412
	HIMT	Objects	Mean	17.5193	1.06617	3.04483	65.7343	0.123833	0.138667	0.943167	0.554833	5.898	0.476167	1.7135	2.78133							0.03	5.01155	186.225	642.964	1827.49	93.5803	46.6805	12579.8	11.4481	29.5735	87.4049	38.1738	4.66041	19.2489	#DIV/0!	6.09323	386.432	12.6488	158.489	3.82657	3.08593	#DIV/0!	0.081616	0.087568	1.6498	0.302344	0.0801574	246.111
	Roman Mn decol	vessel base	AM79-534a	17.172	0.592	2.248	69.278	0.068	0.108	1.006	0.674	6.944	0.102	1.4	0.414								1.42182	168.857	383.069	383.379	27.8336	16.1296	10354	7.48369	11.474	21.6075	23.9006	2.97769	14.5873		6.83891	477.476	6.23277	40.1215	1.29356	2.91925	0.891635	0.0953608	0	2.43453	2662.96	0.0239754	389.112
	Roman Mn decol	vessel rim	AM79-534c	16.058	0.536	2.43	69.866	0.12	0.074	0.994	0.604	7.276	0.072	1.604	0.358
	Roman Mn decol	vessel	AM79-544a	15.264	0.548	2.97	69.246	0.064	0.056	1.2	0.46	8.138	0.09	1.532	0.43
	Roman Mn decol	vessel rim	AM79-544b	16.05	0.676	2.822	68.506	0.068	0.086	1.066	0.578	8.318	0.116	1.172	0.548
	Roman Mn decol	vessel	AM79-553	14.636	0.542	2.674	69.96	0.09	0.058	1.028	0.484	8.17	0.07	1.898	0.384
	Roman Mn decol	hollow foot ring	AM79-555	18.588	0.758	2.308	67.074	0.046	0.118	1.086	0.582	7.2	0.098	1.616	0.524
	Roman Mn decol	vessel neck with handle	ΑΜ82-95a	17.404	0.638	2.838	68.074	0.1	0.068	1.208	0.496	7.452	0.092	1.158	0.468								1.29724	152.121	405.147	439.903	26.1647	20.5326	8370.52	7.85792	10.7212	14.3991	12.2527	3.58463	2.49792	4.83128	6.66104	418.622	6.99774	38.4366	1.39795	2.29294		0.021062	0	0.61857		0.00561313	307.625
	Roman Mn decol	stemmed lamp	AM83-56b	18.208	0.848	2.228	67.532	0.076	0.166	0.89	0.554	7.144	0.122	1.51	0.724								5.75738	166.354	233.895	684.499	25.0453	13.7932	10213.3	5.34208	10.3251	44.1959	19.8379	3.53603	3.5968		6.63947	535.948	6.99672	69.5996	2.05754	2.07212		0.0917426	0	14.1904	9.04933	0.0852007	282.159
	Roman Mn decol	small vessel	AM88-89_7-8-9.1	17.442	0.648	2.146	70.064	0.008	0.108	1.12	0.418	5.906	0.128	1.224	0.792								2.65573	195.548	173.266	594.664	24.1359	15.2811	8812.51	4.55625	12.369	26.0713	18.7373	3.18962	5.79339		5.32575	386.36	6.66106	54.3632	1.71276	2.1875	0.041851	0.0154179	0.00131114	0.589199	1.24522	0.0354935	149.955
	Roman Mn decol	small vessel	AM88-89_7-8-9.2	17.474	0.65	2.15	70.032	0.018	0.114	1.13	0.412	5.866	0.118	1.208	0.818
	Roman Mn decol	Objects	Mean	16.8296	0.6436	2.4814	68.9632	0.0658	0.0956	1.0728	0.5262	7.2414	0.1008	1.4322	0.546								2.78304	170.72	298.844	525.611	25.7949	16.4341	9437.59	6.30999	11.2223	26.5684	18.6821	3.32199	6.61885	4.83128	6.36629	454.602	6.72208	50.6302	1.61545	2.36795	0.466743	0.0558958	0.000327786	4.45818	891.084	0.0375707	282.213
	Unassigned	vessel	AM79-534b	18.694	0.62	1.984	69.32	0.028	0.148	1.074	0.624	6.822	0.072	0.17	0.444
	Unassigned	ring base	ΑΜ81-587c	15.612	0.444	2.368	71.884	0.112	0.062	1.06	0.564	7.52	0.066	0.032	0.274
	Unassigned	vessel	AM83-45	17.434	0.388	1.696	73.17	0.016	0.102	1.142	0.416	5.29	0.064	0.016	0.274
	Unassigned	ribbed bowl	AM85-178	17.702	0.532	2.408	68.394	0.066	0.104	1.112	0.612	7.916	0.08	0.67	0.408								0.599383	201.709	392.053	306.893	12.9031	12.0172	4995.82	69.549	9.17174	71.6078	16.1431	3.14315	2.47553	0.692146	7.94062	449.355	6.0344	31.4141	1.10399	2.37205	10.4572	0.0440415	0.0308301	2.55226	88.8969	0.0479144	262.468
	Unassigned	vessel base	AM88-89_34a2	15.074	0.596	2.618	70.796	0.112	0.046	0.878	0.876	8.48	0.09	0.032	0.404
	Unassigned	small vessel	AM88-89_7-8-9.3	18.832	0.87	2.054	68.658	0.016	0.162	1.134	0.428	7.04	0.114	0.112	0.578								3.81107	147.881	167.549	608.001	12.6185	14.3692	764.388	2.33307	4.95722	21.2763	30.1205	2.79332	41.1023		4.4045	508.607	6.18861	60.9168	2.03513	0.302767	0.241437	0.0978588	0	2.39211	3472.21	0.0500934	135.703
	Unassigned	Objects	Mean	17.2247	0.575	2.188	70.3703	0.0583333	0.104	1.06667	0.586667	7.178	0.081	0.172	0.397								2.20523	174.795	279.801	457.447	12.7608	13.1932	2880.11	35.941	7.06448	46.442	23.1318	2.96824	21.7889	0.692146	6.17256	478.981	6.11151	46.1654	1.56956	1.33741	5.34932	0.0709501	0.0154151	2.47219	1780.55	0.0490039	199.085
	Early Modern	vessel	AM79-545	15.432	1.562	1.71	73.982	0.016	0.032	0.116	0.072	6.452	0.148	0.008	0.028					0.442
	Early Modern	vessel	AM79-547-a1	15.024	1.41	0.96	73.668	0	0.174	0.224	3.082	5.15	0.056	0.02	0.06			0.172
	Early Modern	vessel	AM79-547-a2	14.796	1.39	0.952	73.774	0	0.19	0.218	3.124	5.234	0.05	0.01	0.07			0.19
	Early Modern	handle? vessel?	AM79-547b	13.462	0.88	1.054	75.114	0	0.19	0.118	4.15	4.588	0.044	0.014	0.096			0.288
	Early Modern	Objects	Mean	14.6785	1.3105	1.169	74.1345	0.004	0.1465	0.169	2.607	5.356	0.0745	0.013	0.0635
[truncated: 23 more columns]

## Sheet: Corn A
														Fe2O3
														1.09
					14.3	2.66	1	66.56	0.14	2.87	5.03	0.79	1	0.980019	0.17	1.17	0.1	0.19	1.75	0.46
			Spectrum Label	Project Path	Na2O	MgO	Al2O3	SiO2	SO3	K2O	CaO	TiO2	MnO	FeO	CoO	CuO	SrO	SnO	Sb2O5	BaO		Na2O	MgO	Al2O3	SiO2	SO3	K2O	CaO	TiO2	MnO	FeO	CoO	CuO	SrO	SnO	Sb2O5	BaO
2021-01-28			Spectrum 1	AM77-28j, 28n, 36a-b, 37b, 37d/Corn A/Site 1	13.6	2.57	1	67.17	0.06	2.9	5.22	0.89	1.03	1.05	0.24	1.28	0.69	0.13	1.72	0.46		1.06581e-14	0.010068	0.00292517	0.0510884	0.0114966	0.032449	0.0247619	0.0355782	0.0531293	0.0410884	0.054726	0.022381	0.69	0.13	0.0114966	0.049932
			Spectrum 2	AM77-28j, 28n, 36a-b, 37b, 37d/Corn A/Site 1	13.61	2.56	1.04	67.26	0.09	2.91	5.23	0.88	1.17	0.99	0.18	1.25	0.62	0.06	1.72	0.44		0.01	0.020068	0.0370748	0.0389116	0.0185034	0.022449	0.0347619	0.0255782	0.0868707	0.0189116	0.00527397	0.00761905	0.62	0.06	0.0114966	0.069932
			Spectrum 3	AM77-28j, 28n, 36a-b, 37b, 37d/Corn A/Site 1	13.64	2.52	0.97	67.05	0.07	2.99	5.16	0.92	1.13	1.05	0.22	1.29	0.57	0.18	1.81	0.44		0.04	0.060068	0.0329252	0.171088	0.0014966	0.057551	0.0352381	0.0655782	0.0468707	0.0410884	0.034726	0.032381	0.57	0.18	0.101497	0.069932
			Spectrum 4	AM77-28j, 28n, 36a-b, 37b, 37d/Corn A/Site 1	13.66	2.56	1	67.08	0.06	2.97	5.17	0.86	1.14	1.04	0.2	1.28	0.62	0.19	1.74	0.45		0.06	0.020068	0.00292517	0.141088	0.0114966	0.037551	0.0252381	0.00557823	0.0568707	0.0310884	0.014726	0.022381	0.62	0.19	0.0314966	0.059932
			Spectrum 5	AM77-28j, 28n, 36a-b, 37b, 37d/Corn A/Site 1	13.65	2.54	0.94	67.2	0.08	2.96	5.18	0.85	1	1.05	0.19	1.21	0.6	0.24	1.77	0.54		0.05	0.040068	0.0629252	0.0210884	0.0085034	0.027551	0.0152381	0.00442177	0.0831293	0.0410884	0.00472603	0.047619	0.6	0.24	0.0614966	0.030068
			Spectrum 81	AM77-28j, 28n, 36a-b, 37b, 37d/Corn A/Site 1	13.69	2.6	1	67.19	0.07	2.95	5.16	0.81	1.08	1.02	0.21	1.19	0.6	0.17	1.67	0.58		0.09	0.019932	0.00292517	0.0310884	0.0014966	0.017551	0.0352381	0.0444218	0.00312925	0.0110884	0.024726	0.067619	0.6	0.17	0.0385034	0.070068
			Spectrum 82	AM77-28j, 28n, 36a-b, 37b, 37d/Corn A/Site 1	13.56	2.63	1	67.13	0.05	2.96	5.13	0.86	1.12	0.97	0.2	1.22	0.69	0.26	1.67	0.55		0.04	0.049932	0.00292517	0.0910884	0.0214966	0.027551	0.0652381	0.00557823	0.0368707	0.0389116	0.014726	0.037619	0.69	0.26	0.0385034	0.040068
			Spectrum 83	AM77-28j, 28n, 36a-b, 37b, 37d/Corn A/Site 1	13.65	2.57	0.99	67.42	0.06	2.98	5.15	0.94	1.08	1.06	0.14	1.25	0.63	0.07	1.56	0.43		0.05	0.010068	0.0129252	0.198912	0.0114966	0.047551	0.0452381	0.0855782	0.00312925	0.0510884	0.045274	0.00761905	0.63	0.07	0.148503	0.079932
			Spectrum 84	AM77-28j, 28n, 36a-b, 37b, 37d/Corn A/Site 1	13.79	2.62	1	67.24	0.08	2.92	5.16	0.81	1.08	0.97	0.19	1.31	0.58	0.05	1.71	0.49		0.19	0.039932	0.00292517	0.0189116	0.0085034	0.012449	0.0352381	0.0444218	0.00312925	0.0389116	0.00472603	0.052381	0.58	0.05	0.0014966	0.019932
			Spectrum 85	AM77-28j, 28n, 36a-b, 37b, 37d/Corn A/Site 1	13.65	2.59	0.97	67.02	0.07	2.93	5.17	0.92	1.05	0.97	0.17	1.33	0.62	0.26	1.81	0.48		0.05	0.00993197	0.0329252	0.201088	0.0014966	0.00244898	0.0252381	0.0655782	0.0331293	0.0389116	0.015274	0.072381	0.62	0.26	0.101497	0.029932
2021-02-02			Spectrum 1	AM77-38a1-5, 39b1-4/Corn A/Site 1	13.52	2.54	1.05	67.21	0.06	2.91	5.19	0.87	1.08	1	0.16	1.36	0.59	0.14	1.77	0.55		0.08	0.040068	0.0470748	0.0110884	0.0114966	0.022449	0.0052381	0.0155782	0.00312925	0.00891156	0.025274	0.102381	0.59	0.14	0.0614966	0.040068
			Spectrum 2	AM77-38a1-5, 39b1-4/Corn A/Site 1	13.5	2.55	1.01	67.25	0.08	2.99	5.27	0.89	1.07	1.05	0.19	1.28	0.59	0.11	1.75	0.43		0.1	0.030068	0.00707483	0.0289116	0.0085034	0.057551	0.0747619	0.0355782	0.0131293	0.0410884	0.00472603	0.022381	0.59	0.11	0.0414966	0.079932
			Spectrum 3	AM77-38a1-5, 39b1-4/Corn A/Site 1	13.42	2.62	0.97	67.34	0.07	2.93	5.22	0.84	1.14	1.09	0.15	1.22	0.51	0.17	1.8	0.53		0.18	0.039932	0.0329252	0.118912	0.0014966	0.00244898	0.0247619	0.0144218	0.0568707	0.0810884	0.035274	0.037619	0.51	0.17	0.0914966	0.020068
			Spectrum 4	AM77-38a1-5, 39b1-4/Corn A/Site 1	13.51	2.52	0.98	67.3	0.07	2.94	5.26	0.88	1.07	1	0.21	1.27	0.57	0.18	1.68	0.54		0.09	0.060068	0.0229252	0.0789116	0.0014966	0.00755102	0.0647619	0.0255782	0.0131293	0.00891156	0.024726	0.012381	0.57	0.18	0.0285034	0.030068
			Spectrum 5	AM77-38a1-5, 39b1-4/Corn A/Site 1	13.58	2.53	0.98	67.15	0.07	2.92	5.21	0.87	1.09	0.99	0.21	1.28	0.59	0.16	1.83	0.53		0.02	0.050068	0.0229252	0.0710884	0.0014966	0.012449	0.0147619	0.0155782	0.00687075	0.0189116	0.024726	0.022381	0.59	0.16	0.121497	0.020068
			Spectrum 87	AM77-38a1-5, 39b1-4/Corn A/Site 1	13.6	2.47	1.02	67.22	0.07	2.94	5.28	0.88	1.11	1.05	0.16	1.29	0.62	0.11	1.7	0.48		1.06581e-14	0.110068	0.0170748	0.00108844	0.0014966	0.00755102	0.0847619	0.0255782	0.0268707	0.0410884	0.025274	0.032381	0.62	0.11	0.0085034	0.029932
			Spectrum 88	AM77-38a1-5, 39b1-4/Corn A/Site 1	13.54	2.53	1.01	67.39	0.06	2.96	5.21	0.83	1.09	1.04	0.19	1.26	0.51	0.06	1.83	0.49		0.06	0.050068	0.00707483	0.168912	0.0114966	0.027551	0.0147619	0.0244218	0.00687075	0.0310884	0.00472603	0.00238095	0.51	0.06	0.121497	0.019932
			Spectrum 89	AM77-38a1-5, 39b1-4/Corn A/Site 1	13.53	2.55	0.99	67.22	0.07	2.92	5.25	0.88	1.08	1.02	0.23	1.24	0.6	0.22	1.72	0.48		0.07	0.030068	0.0129252	0.00108844	0.0014966	0.012449	0.0547619	0.0255782	0.00312925	0.0110884	0.044726	0.017619	0.6	0.22	0.0114966	0.029932
			Spectrum 90	AM77-38a1-5, 39b1-4/Corn A/Site 1	13.54	2.58	1.01	67.12	0.07	2.95	5.2	0.91	1.05	1.03	0.2	1.35	0.63	0.1	1.78	0.46		0.06	6.80272e-05	0.00707483	0.101088	0.0014966	0.017551	0.0047619	0.0555782	0.0331293	0.0210884	0.014726	0.092381	0.63	0.1	0.0714966	0.049932
			Spectrum 91	AM77-38a1-5, 39b1-4/Corn A/Site 1	13.49	2.57	0.98	67.41	0.08	2.89	5.23	0.81	1.07	1.04	0.14	1.25	0.63	0.02	1.76	0.63		0.11	0.010068	0.0229252	0.188912	0.0085034	0.042449	0.0347619	0.0444218	0.0131293	0.0310884	0.045274	0.00761905	0.63	0.02	0.0514966	0.120068
2021-02-04			Spectrum 1	AM77-39a, 39b1-3, 39c1-3/Corn A/Site 1	13.52	2.56	0.96	67.32	0.07	2.94	5.24	0.84	1.11	1.05	0.18	1.28	0.59	0.08	1.77	0.5		0.08	0.020068	0.0429252	0.0989116	0.0014966	0.00755102	0.0447619	0.0144218	0.0268707	0.0410884	0.00527397	0.022381	0.59	0.08	0.0614966	0.00993197
			Spectrum 2	AM77-39a, 39b1-3, 39c1-3/Corn A/Site 1	13.54	2.55	0.99	67.15	0.07	2.97	5.23	0.83	1.12	1.05	0.2	1.25	0.47	0.19	1.79	0.58		0.06	0.030068	0.0129252	0.0710884	0.0014966	0.037551	0.0347619	0.0244218	0.0368707	0.0410884	0.014726	0.00761905	0.47	0.19	0.0814966	0.070068
			Spectrum 3	AM77-39a, 39b1-3, 39c1-3/Corn A/Site 1	13.61	2.53	1.05	67.45	0.09	2.98	5.12	0.85	1.09	1.02	0.18	1.28	0.49	0.13	1.59	0.55		0.01	0.050068	0.0470748	0.228912	0.0185034	0.047551	0.0752381	0.00442177	0.00687075	0.0110884	0.00527397	0.022381	0.49	0.13	0.118503	0.040068
			Spectrum 4	AM77-39a, 39b1-3, 39c1-3/Corn A/Site 1	13.5	2.61	0.99	67.46	0.05	2.94	5.18	0.82	1.09	1.03	0.16	1.27	0.51	0.05	1.77	0.56		0.1	0.029932	0.0129252	0.238912	0.0214966	0.00755102	0.0152381	0.0344218	0.00687075	0.0210884	0.025274	0.012381	0.51	0.05	0.0614966	0.050068
			Spectrum 5	AM77-39a, 39b1-3, 39c1-3/Corn A/Site 1	13.56	2.55	1.01	67.07	0.07	2.97	5.23	0.86	1.08	1.03	0.18	1.26	0.49	0.3	1.88	0.48		0.04	0.030068	0.00707483	0.151088	0.0014966	0.037551	0.0347619	0.00557823	0.00312925	0.0210884	0.00527397	0.00238095	0.49	0.3	0.171497	0.029932
			Spectrum 64	AM77-39a, 39b1-3, 39c1-3/Corn A/Site 1	13.55	2.56	0.97	67.23	0.09	2.86	5.29	0.81	1.08	0.99	0.18	1.29	0.63	0.15	1.79	0.55		0.05	0.020068	0.0329252	0.00891156	0.0185034	0.072449	0.0947619	0.0444218	0.00312925	0.0189116	0.00527397	0.032381	0.63	0.15	0.0814966	0.040068
			Spectrum 65	AM77-39a, 39b1-3, 39c1-3/Corn A/Site 1	13.52	2.56	1	67.54	0.08	2.97	5.26	0.81	1.08	1.02	0.14	1.24	0.59	0.05	1.61	0.54		0.08	0.020068	0.00292517	0.318912	0.0085034	0.037551	0.0647619	0.0444218	0.00312925	0.0110884	0.045274	0.017619	0.59	0.05	0.0985034	0.030068
			Spectrum 66	AM77-39a, 39b1-3, 39c1-3/Corn A/Site 1	13.42	2.62	0.99	67.16	0.06	2.94	5.29	0.9	1.14	1	0.22	1.27	0.56	0.11	1.78	0.52		0.18	0.039932	0.0129252	0.0610884	0.0114966	0.00755102	0.0947619	0.0455782	0.0568707	0.00891156	0.034726	0.012381	0.56	0.11	0.0714966	0.010068
			Spectrum 67	AM77-39a, 39b1-3, 39c1-3/Corn A/Site 1	13.51	2.58	1.02	67.15	0.06	2.96	5.22	0.87	1.08	1.06	0.21	1.26	0.71	0.09	1.71	0.52		0.09	6.80272e-05	0.0170748	0.0710884	0.0114966	0.027551	0.0247619	0.0155782	0.00312925	0.0510884	0.024726	0.00238095	0.71	0.09	0.0014966	0.010068
			Spectrum 68	AM77-39a, 39b1-3, 39c1-3/Corn A/Site 1	13.47	2.55	0.98	67.36	0.07	2.93	5.28	0.92	1.15	1	0.18	1.3	0.6	0.05	1.71	0.46		0.13	0.030068	0.0229252	0.138912	0.0014966	0.00244898	0.0847619	0.0655782	0.0668707	0.00891156	0.00527397	0.042381	0.6	0.05	0.0014966	0.049932
2021-02-04			Spectrum 1	AM77-42a, 42b1-3, 42c1-3/Corn A/Site 1	13.59	2.57	0.99	67.15	0.05	2.96	5.18	0.82	1.12	1.02	0.21	1.32	0.63	0.17	1.69	0.54		0.01	0.010068	0.0129252	0.0710884	0.0214966	0.027551	0.0152381	0.0344218	0.0368707	0.0110884	0.024726	0.062381	0.63	0.17	0.0185034	0.030068
			Spectrum 2	AM77-42a, 42b1-3, 42c1-3/Corn A/Site 1	13.52	2.54	1	67.54	0.08	2.96	5.25	0.81	1.07	0.97	0.21	1.33	0.62	0.03	1.48	0.59		0.08	0.040068	0.00292517	0.318912	0.0085034	0.027551	0.0547619	0.0444218	0.0131293	0.0389116	0.024726	0.072381	0.62	0.03	0.228503	0.080068
			Spectrum 89	AM77-42a, 42b1-3, 42c1-3/Corn A/Site 1	13.6	2.51	0.99	67.6	0.05	2.99	5.2	0.88	1.1	0.98	0.15	1.2	0.5	0.1	1.66	0.5		1.06581e-14	0.070068	0.0129252	0.378912	0.0214966	0.057551	0.0047619	0.0255782	0.0168707	0.0289116	0.035274	0.057619	0.5	0.1	0.0485034	0.00993197
			Spectrum 90	AM77-42a, 42b1-3, 42c1-3/Corn A/Site 1	13.57	2.61	0.99	67.42	0.05	2.94	5.25	0.87	1.08	1.08	0.21	1.15	0.53	0.07	1.72	0.46		0.03	0.029932	0.0129252	0.198912	0.0214966	0.00755102	0.0547619	0.0155782	0.00312925	0.0710884	0.024726	0.107619	0.53	0.07	0.0114966	0.049932
			Spectrum 91	AM77-42a, 42b1-3, 42c1-3/Corn A/Site 1	13.55	2.62	0.96	67.11	0.07	2.91	5.24	0.84	1.05	1.06	0.21	1.23	0.66	0.23	1.69	0.56		0.05	0.039932	0.0429252	0.111088	0.0014966	0.022449	0.0447619	0.0144218	0.0331293	0.0510884	0.024726	0.027619	0.66	0.23	0.0185034	0.050068
			Spectrum 92	AM77-42a, 42b1-3, 42c1-3/Corn A/Site 1	13.44	2.59	1.02	67.17	0.09	2.99	5.26	0.89	1.09	0.96	0.17	1.27	0.63	0.26	1.69	0.5		0.16	0.00993197	0.0170748	0.0510884	0.0185034	0.057551	0.0647619	0.0355782	0.00687075	0.0489116	0.015274	0.012381	0.63	0.26	0.0185034	0.00993197
			Spectrum 93	AM77-42a, 42b1-3, 42c1-3/Corn A/Site 1	13.48	2.52	1	67.14	0.08	2.99	5.23	0.82	1.08	1.03	0.25	1.25	0.67	0.22	1.67	0.57		0.12	0.060068	0.00292517	0.0810884	0.0085034	0.057551	0.0347619	0.0344218	0.00312925	0.0210884	0.064726	0.00761905	0.67	0.22	0.0385034	0.060068
2021-02-09			Spectrum 2	AM77-53b1-3, 53d, 60a1-6/Corn A/Site 1	13.63	2.59	1.01	67.36	0.06	2.98	5.24	0.85	1	1.03	0.18	1.25	0.55	0.13	1.59	0.56		0.03	0.00993197	0.00707483	0.138912	0.0114966	0.047551	0.0447619	0.00442177	0.0831293	0.0210884	0.00527397	0.00761905	0.55	0.13	0.118503	0.050068
			Spectrum 3	AM77-53b1-3, 53d, 60a1-6/Corn A/Site 1	13.55	2.61	0.96	67.11	0.08	2.96	5.18	0.86	1.12	0.96	0.16	1.29	0.7	0.15	1.73	0.57		0.05	0.029932	0.0429252	0.111088	0.0085034	0.027551	0.0152381	0.00557823	0.0368707	0.0489116	0.025274	0.032381	0.7	0.15	0.0214966	0.060068
			Spectrum 4	AM77-53b1-3, 53d, 60a1-6/Corn A/Site 1	13.48	2.52	1.09	67.41	0.06	2.95	5.24	0.85	1.11	1	0.2	1.25	0.63	0.05	1.62	0.54		0.12	0.060068	0.0870748	0.188912	0.0114966	0.017551	0.0447619	0.00442177	0.0268707	0.00891156	0.014726	0.00761905	0.63	0.05	0.0885034	0.030068
			Spectrum 5	AM77-53b1-3, 53d, 60a1-6/Corn A/Site 1	13.64	2.53	0.99	67.35	0.08	2.9	5.21	0.9	1.06	1.04	0.21	1.31	0.7	0.03	1.62	0.44		0.04	0.050068	0.0129252	0.128912	0.0085034	0.032449	0.0147619	0.0455782	0.0231293	0.0310884	0.024726	0.052381	0.7	0.03	0.0885034	0.069932
			Spectrum 6	AM77-53b1-3, 53d, 60a1-6/Corn A/Site 1	13.48	2.57	0.98	67.21	0.08	2.96	5.25	0.85	1.17	1.01	0.13	1.32	0.59	0.2	1.7	0.51		0.12	0.010068	0.0229252	0.0110884	0.0085034	0.027551	0.0547619	0.00442177	0.0868707	0.00108844	0.055274	0.062381	0.59	0.2	0.0085034	6.80272e-05
			Spectrum 116	AM77-53b1-3, 53d, 60a1-6/Corn A/Site 1	13.51	2.58	0.98	67.21	0.08	2.94	5.21	0.9	1.11	0.98	0.23	1.28	0.58	0.12	1.83	0.45		0.09	6.80272e-05	0.0229252	0.0110884	0.0085034	0.00755102	0.0147619	0.0455782	0.0268707	0.0289116	0.044726	0.022381	0.58	0.12	0.121497	0.059932
			Spectrum 117	AM77-53b1-3, 53d, 60a1-6/Corn A/Site 1	13.6	2.52	0.97	67.19	0.06	2.92	5.31	0.87	1.12	1	0.19	1.29	0.64	0.01	1.83	0.47		1.06581e-14	0.060068	0.0329252	0.0310884	0.0114966	0.012449	0.114762	0.0155782	0.0368707	0.00891156	0.00472603	0.032381	0.64	0.01	0.121497	0.039932
			Spectrum 118	AM77-53b1-3, 53d, 60a1-6/Corn A/Site 1	13.59	2.6	1	67.36	0.07	2.88	5.18	0.82	1.07	1.01	0.13	1.33	0.52	0.11	1.77	0.56		0.01	0.019932	0.00292517	0.138912	0.0014966	0.052449	0.0152381	0.0344218	0.0131293	0.00108844	0.055274	0.072381	0.52	0.11	0.0614966	0.050068
			Spectrum 119	AM77-53b1-3, 53d, 60a1-6/Corn A/Site 1	13.48	2.63	0.98	67.11	0.06	2.95	5.22	0.88	1.08	1.01	0.19	1.24	0.62	0.26	1.75	0.54		0.12	0.049932	0.0229252	0.111088	0.0114966	0.017551	0.0247619	0.0255782	0.00312925	0.00108844	0.00472603	0.017619	0.62	0.26	0.0414966	0.030068
			Spectrum 120	AM77-53b1-3, 53d, 60a1-6/Corn A/Site 1	13.54	2.58	1	67.17	0.07	2.98	5.22	0.83	1.1	1.03	0.23	1.38	0.65	0.1	1.57	0.55		0.06	6.80272e-05	0.00292517	0.0510884	0.0014966	0.047551	0.0247619	0.0244218	0.0168707	0.0210884	0.044726	0.122381	0.65	0.1	0.138503	0.040068
2021-02-16			Spectrum 1	AM77-62a1-5, 62b1-6, 62c_NEW/Corn A/Site 1	13.76	2.58	1.03	67.47	0.05	2.88	5.17	0.86	1.05	1.01	0.12	1.24	0.58	0.04	1.67	0.48		0.16	6.80272e-05	0.0270748	0.248912	0.0214966	0.052449	0.0252381	0.00557823	0.0331293	0.00108844	0.065274	0.017619	0.58	0.04	0.0385034	0.029932
			Spectrum 2	AM77-62a1-5, 62b1-6, 62c_NEW/Corn A/Site 1	13.65	2.54	1.04	67.32	0.07	2.86	5.25	0.82	1.02	1	0.19	1.22	0.55	0.13	1.82	0.5		0.05	0.040068	0.0370748	0.0989116	0.0014966	0.072449	0.0547619	0.0344218	0.0631293	0.00891156	0.00472603	0.037619	0.55	0.13	0.111497	0.00993197
			Spectrum 3	AM77-62a1-5, 62b1-6, 62c_NEW/Corn A/Site 1	13.77	2.6	1.01	67.16	0.08	2.86	5.14	0.9	1.04	0.98	0.19	1.21	0.66	0.13	1.76	0.52		0.17	0.019932	0.00707483	0.0610884	0.0085034	0.072449	0.0552381	0.0455782	0.0431293	0.0289116	0.00472603	0.047619	0.66	0.13	0.0514966	0.010068
			Spectrum 4	AM77-62a1-5, 62b1-6, 62c_NEW/Corn A/Site 1	13.63	2.55	1.02	67.28	0.07	2.92	5.13	0.85	1.05	0.97	0.18	1.37	0.57	0.13	1.79	0.51		0.03	0.030068	0.0170748	0.0589116	0.0014966	0.012449	0.0652381	0.00442177	0.0331293	0.0389116	0.00527397	0.112381	0.57	0.13	0.0814966	6.80272e-05
			Spectrum 5	AM77-62a1-5, 62b1-6, 62c_NEW/Corn A/Site 1	13.73	2.6	0.97	67.04	0.07	2.95	5.21	0.85	1.08	1	0.21	1.27	0.59	0.11	1.78	0.53		0.13	0.019932	0.0329252	0.181088	0.0014966	0.017551	0.0147619	0.00442177	0.00312925	0.00891156	0.024726	0.012381	0.59	0.11	0.0714966	0.020068
			Spectrum 133	AM77-62a1-5, 62b1-6, 62c_NEW/Corn A/Site 1	13.69	2.57	1.04	67.26	0.06	2.89	5.19	0.89	1.08	1.03	0.2	1.23	0.69	0.1	1.72	0.37		0.09	0.010068	0.0370748	0.0389116	0.0114966	0.042449	0.0052381	0.0355782	0.00312925	0.0210884	0.014726	0.027619	0.69	0.1	0.0114966	0.139932
			Spectrum 134	AM77-62a1-5, 62b1-6, 62c_NEW/Corn A/Site 1	13.66	2.61	1.02	67.45	0.07	2.94	5.16	0.87	1.09	1.01	0.14	1.22	0.56	0.04	1.61	0.55		0.06	0.029932	0.0170748	0.228912	0.0014966	0.00755102	0.0352381	0.0155782	0.00687075	0.00108844	0.045274	0.037619	0.56	0.04	0.0985034	0.040068
			Spectrum 135	AM77-62a1-5, 62b1-6, 62c_NEW/Corn A/Site 1	13.73	2.59	0.99	67.24	0.07	2.91	5.17	0.83	1.05	0.96	0.18	1.33	0.66	0.01	1.77	0.52		0.13	0.00993197	0.0129252	0.0189116	0.0014966	0.022449	0.0252381	0.0244218	0.0331293	0.0489116	0.00527397	0.072381	0.66	0.01	0.0614966	0.010068
			Spectrum 136	AM77-62a1-5, 62b1-6, 62c_NEW/Corn A/Site 1	13.72	2.56	1.02	67	0.06	2.92	5.14	0.88	1.12	1.02	0.19	1.31	0.7	0.08	1.76	0.52		0.12	0.020068	0.0170748	0.221088	0.0114966	0.012449	0.0552381	0.0255782	0.0368707	0.0110884	0.00472603	0.052381	0.7	0.08	0.0514966	0.010068
			Spectrum 137	AM77-62a1-5, 62b1-6, 62c_NEW/Corn A/Site 1	13.71	2.59	0.98	67.35	0.1	2.98	5.14	0.89	1.08	0.99	0.18	1.3	0.65	0.03	1.59	0.43		0.11	0.00993197	0.0229252	0.128912	0.0285034	0.047551	0.0552381	0.0355782	0.00312925	0.0189116	0.00527397	0.042381	0.65	0.03	0.118503	0.079932
2021-02-18			Spectrum 1	AM78-109, 205, 604a-b, 605, 608, 609a-b/Corn A/Site 1	13.66	2.6	0.98	67.29	0.04	2.97	5.16	0.87	1.11	0.96	0.17	1.25	0.68	0.17	1.65	0.45		0.06	0.019932	0.0229252	0.0689116	0.0314966	0.037551	0.0352381	0.0155782	0.0268707	0.0489116	0.015274	0.00761905	0.68	0.17	0.0585034	0.059932
			Spectrum 2	AM78-109, 205, 604a-b, 605, 608, 609a-b/Corn A/Site 1	13.74	2.59	1	67.1	0.07	2.91	5.14	0.81	1.15	0.97	0.25	1.34	0.66	0.05	1.74	0.47		0.14	0.00993197	0.00292517	0.121088	0.0014966	0.022449	0.0552381	0.0444218	0.0668707	0.0389116	0.064726	0.082381	0.66	0.05	0.0314966	0.039932
			Spectrum 3	AM78-109, 205, 604a-b, 605, 608, 609a-b/Corn A/Site 1	13.76	2.54	1.06	67.31	0.06	2.92	5.13	0.81	1.12	1.06	0.19	1.29	0.48	0.09	1.64	0.56		0.16	0.040068	0.0570748	0.0889116	0.0114966	0.012449	0.0652381	0.0444218	0.0368707	0.0510884	0.00472603	0.032381	0.48	0.09	0.0685034	0.050068
			Spectrum 4	AM78-109, 205, 604a-b, 605, 608, 609a-b/Corn A/Site 1	13.69	2.6	1	67.35	0.05	2.92	5.17	0.85	1.08	1.01	0.11	1.31	0.62	0.06	1.75	0.41		0.09	0.019932	0.00292517	0.128912	0.0214966	0.012449	0.0252381	0.00442177	0.00312925	0.00108844	0.075274	0.052381	0.62	0.06	0.0414966	0.099932
			Spectrum 5	AM78-109, 205, 604a-b, 605, 608, 609a-b/Corn A/Site 1	13.71	2.57	1.02	67.24	0.05	2.91	5.23	0.86	1.05	1.02		1.23	0.64	0.16	1.79	0.51		0.11	0.010068	0.0170748	0.0189116	0.0214966	0.022449	0.0347619	0.00557823	0.0331293	0.0110884	0.185274	0.027619	0.64	0.16	0.0814966	6.80272e-05
			Spectrum 78	AM78-109, 205, 604a-b, 605, 608, 609a-b/Corn A/Site 1	13.72	2.58	1.01	67.52	0.07	2.88	5.21	0.77	1.08	0.9	0.24	1.2	0.68	0	1.53	0.59		0.12	6.80272e-05	0.00707483	0.298912	0.0014966	0.052449	0.0147619	0.0844218	0.00312925	0.108912	0.054726	0.057619	0.68	0	0.178503	0.080068
			Spectrum 79	AM78-109, 205, 604a-b, 605, 608, 609a-b/Corn A/Site 1	13.59	2.6	1.01	67.29	0.08	2.94	5.19	0.9	1.06	0.99	0.17	1.28	0.59	0.14	1.73	0.45		0.01	0.019932	0.00707483	0.0689116	0.0085034	0.00755102	0.0052381	0.0455782	0.0231293	0.0189116	0.015274	0.022381	0.59	0.14	0.0214966	0.059932
			Spectrum 80	AM78-109, 205, 604a-b, 605, 608, 609a-b/Corn A/Site 1	13.76	2.6	1	67.43	0.04	2.92	5.16	0.83	1.06	0.98	0.2	1.25	0.56	0.09	1.65	0.47		0.16	0.019932	0.00292517	0.208912	0.0314966	0.012449	0.0352381	0.0244218	0.0231293	0.0289116	0.014726	0.00761905	0.56	0.09	0.0585034	0.039932
			Spectrum 81	AM78-109, 205, 604a-b, 605, 608, 609a-b/Corn A/Site 1	13.69	2.59	0.96	67.36	0.07	2.9	5.18	0.84	1.1	1	0.17	1.18	0.56	0.14	1.76	0.49		0.09	0.00993197	0.0429252	0.138912	0.0014966	0.032449	0.0152381	0.0144218	0.0168707	0.00891156	0.015274	0.077619	0.56	0.14	0.0514966	0.019932
			Spectrum 82	AM78-109, 205, 604a-b, 605, 608, 609a-b/Corn A/Site 1	13.67	2.61	0.98	67.04	0.09	2.92	5.22	0.84	1.09	1.01	0.19	1.24	0.68	0.17	1.73	0.51		0.07	0.029932	0.0229252	0.181088	0.0185034	0.012449	0.0247619	0.0144218	0.00687075	0.00108844	0.00472603	0.017619	0.68	0.17	0.0214966	6.80272e-05
2021-02-23			Spectrum 1	AM79-23a-b, 534a-d, 539, 540a-c, 541, 544a-b/Corn A/Site 1	13.61	2.65	0.98	67.12	0.08	2.9	5.11	0.84	1.02	1.04	0.15	1.23	0.68	0.24	1.74	0.61		0.01	0.069932	0.0229252	0.101088	0.0085034	0.032449	0.0852381	0.0144218	0.0631293	0.0310884	0.035274	0.027619	0.68	0.24	0.0314966	0.100068
			Spectrum 2	AM79-23a-b, 534a-d, 539, 540a-c, 541, 544a-b/Corn A/Site 1	13.55	2.66	0.98	67.63	0.09	2.94	5.26	0.85	1.01	0.99	0.14	1.28	0.52	0	1.58	0.51		0.05	0.079932	0.0229252	0.408912	0.0185034	0.00755102	0.0647619	0.00442177	0.0731293	0.0189116	0.045274	0.022381	0.52	0	0.128503	6.80272e-05
			Spectrum 3	AM79-23a-b, 534a-d, 539, 540a-c, 541, 544a-b/Corn A/Site 1	13.76	2.58	1	66.94	0.07	2.93	5.23	0.83	1.08	1.04	0.19	1.27	0.67	0.24	1.75	0.41		0.16	6.80272e-05	0.00292517	0.281088	0.0014966	0.00244898	0.0347619	0.0244218	0.00312925	0.0310884	0.00472603	0.012381	0.67	0.24	0.0414966	0.099932
			Spectrum 4	AM79-23a-b, 534a-d, 539, 540a-c, 541, 544a-b/Corn A/Site 1	13.71	2.61	1.02	67.31	0.07	2.9	5.14	0.77	1.08	0.9	0.17	1.28	0.64	0.09	1.69	0.63		0.11	0.029932	0.0170748	0.0889116	0.0014966	0.032449	0.0552381	0.0844218	0.00312925	0.108912	0.015274	0.022381	0.64	0.09	0.0185034	0.120068
			Spectrum 5	AM79-23a-b, 534a-d, 539, 540a-c, 541, 544a-b/Corn A/Site 1	13.64	2.66	0.98	67.22	0.04	2.89	5.26	0.82	1.14	0.98	0.24	1.28	0.54	0	1.73	0.57		0.04	0.079932	0.0229252	0.00108844	0.0314966	0.042449	0.0647619	0.0344218	0.0568707	0.0289116	0.054726	0.022381	0.54	0	0.0214966	0.060068
			Spectrum 106	AM79-23a-b, 534a-d, 539, 540a-c, 541, 544a-b/Corn A/Site 1	13.66	2.6	1.05	67.21	0.06	2.89	5.18	0.81	1.07	1	0.22	1.19	0.6	0.07	1.76	0.63		0.06	0.019932	0.0470748	0.0110884	0.0114966	0.042449	0.0152381	0.0444218	0.0131293	0.00891156	0.034726	0.067619	0.6	0.07	0.0514966	0.120068
			Spectrum 107	AM79-23a-b, 534a-d, 539, 540a-c, 541, 544a-b/Corn A/Site 1	13.81	2.58	0.96	67.43	0.07	2.88	5.18	0.83	1.11	0.99	0.15	1.25	0.63	0.01	1.68	0.44		0.21	6.80272e-05	0.0429252	0.208912	0.0014966	0.052449	0.0152381	0.0244218	0.0268707	0.0189116	0.035274	0.00761905	0.63	0.01	0.0285034	0.069932
			Spectrum 108	AM79-23a-b, 534a-d, 539, 540a-c, 541, 544a-b/Corn A/Site 1	13.65	2.6	1.05	67.24	0.04	2.89	5.17	0.94	1.08	0.99	0.21	1.27	0.62	0.13	1.68	0.43		0.05	0.019932	0.0470748	0.0189116	0.0314966	0.042449	0.0252381	0.0855782	0.00312925	0.0189116	0.024726	0.012381	0.62	0.13	0.0285034	0.079932
			Spectrum 109	AM79-23a-b, 534a-d, 539, 540a-c, 541, 544a-b/Corn A/Site 1	13.71	2.6	0.97	67.28	0.05	2.98	5.19	0.88	1.08	0.97	0.2	1.19	0.65	0.19	1.65	0.41		0.11	0.019932	0.0329252	0.0589116	0.0214966	0.047551	0.0052381	0.0255782	0.00312925	0.0389116	0.014726	0.067619	0.65	0.19	0.0585034	0.099932
			Spectrum 110	AM79-23a-b, 534a-d, 539, 540a-c, 541, 544a-b/Corn A/Site 1	13.63	2.65	1.01	67.2	0.07	2.9	5.18	0.93	1.05	0.92	0.2	1.28	0.61	0.15	1.78	0.44		0.03	0.069932	0.00707483	0.0210884	0.0014966	0.032449	0.0152381	0.0755782	0.0331293	0.0889116	0.014726	0.022381	0.61	0.15	0.0714966	0.069932
2021-02-25			Spectrum 1	AM79-545, 547, 547b, 552, 553, 555/Corn A/Site 1	13.53	2.62	0.99	67.05	0.09	2.95	5.19	0.89	1.08	0.98	0.18	1.3	0.7	0.23	1.74	0.49		0.07	0.039932	0.0129252	0.171088	0.0185034	0.017551	0.0052381	0.0355782	0.00312925	0.0289116	0.00527397	0.042381	0.7	0.23	0.0314966	0.019932
			Spectrum 2	AM79-545, 547, 547b, 552, 553, 555/Corn A/Site 1	13.68	2.57	0.98	67.11	0.07	2.87	5.29	0.83	1.09	0.97	0.23	1.17	0.59	0.1	1.92	0.52		0.08	0.010068	0.0229252	0.111088	0.0014966	0.062449	0.0947619	0.0244218	0.00687075	0.0389116	0.044726	0.087619	0.59	0.1	0.211497	0.010068
			Spectrum 3	AM79-545, 547, 547b, 552, 553, 555/Corn A/Site 1	13.58	2.54	1.03	67.31	0.05	2.96	5.2	0.81	1.06	1.06	0.17	1.24	0.65	0.05	1.72	0.56		0.02	0.040068	0.0270748	0.0889116	0.0214966	0.027551	0.0047619	0.0444218	0.0231293	0.0510884	0.015274	0.017619	0.65	0.05	0.0114966	0.050068
			Spectrum 4	AM79-545, 547, 547b, 552, 553, 555/Corn A/Site 1	13.58	2.54	1	67.44	0.08	2.94	5.21	0.93	1.11	0.99	0.15	1.29	0.55	0.06	1.67	0.45		0.02	0.040068	0.00292517	0.218912	0.0085034	0.00755102	0.0147619	0.0755782	0.0268707	0.0189116	0.035274	0.032381	0.55	0.06	0.0385034	0.059932
			Spectrum 5	AM79-545, 547, 547b, 552, 553, 555/Corn A/Site 1	13.62	2.6	0.98	67.16	0.08	2.91	5.24	0.87	1.07	1.02	0.19	1.3	0.57	0.05	1.84	0.51		0.02	0.019932	0.0229252	0.0610884	0.0085034	0.022449	0.0447619	0.0155782	0.0131293	0.0110884	0.00472603	0.042381	0.57	0.05	0.131497	6.80272e-05
			Spectrum 74	AM81-82_576a-c, 586a, 587a-c, 591a, 593a-b, 95a-b, 114, 119/Corn A/Site 1	13.53	2.59	0.97	66.95	0.06	2.9	5.22	0.83	1.05	1.05	0.17	1.4	0.85	0.12	1.76	0.56		0.07	0.00993197	0.0329252	0.271088	0.0114966	0.032449	0.0247619	0.0244218	0.0331293	0.0410884	0.015274	0.142381	0.85	0.12	0.0514966	0.050068
			Spectrum 75	AM81-82_576a-c, 586a, 587a-c, 591a, 593a-b, 95a-b, 114, 119/Corn A/Site 1	13.53	2.55	1.03	67.03	0.08	2.92	5.21	0.81	1.1	1.02	0.23	1.2	0.86	0.16	1.68	0.59		0.07	0.030068	0.0270748	0.191088	0.0085034	0.012449	0.0147619	0.0444218	0.0168707	0.0110884	0.044726	0.057619	0.86	0.16	0.0285034	0.080068
			Spectrum 76	AM81-82_576a-c, 586a, 587a-c, 591a, 593a-b, 95a-b, 114, 119/Corn A/Site 1	13.57	2.62	1.03	67.16	0.08	2.94	5.14	0.85	1.12	0.99	0.16	1.24	0.91	0.06	1.62	0.52		0.03	0.039932	0.0270748	0.0610884	0.0085034	0.00755102	0.0552381	0.00442177	0.0368707	0.0189116	0.025274	0.017619	0.91	0.06	0.0885034	0.010068
			Spectrum 77	AM81-82_576a-c, 586a, 587a-c, 591a, 593a-b, 95a-b, 114, 119/Corn A/Site 1	13.57	2.56	1.01	67.1	0.08	2.88	5.19	0.87	1.08	0.96	0.21	1.2	0.88	0.11	1.7	0.57		0.03	0.020068	0.00707483	0.121088	0.0085034	0.052449	0.0052381	0.0155782	0.00312925	0.0489116	0.024726	0.057619	0.88	0.11	0.0085034	0.060068
			Spectrum 78	AM81-82_576a-c, 586a, 587a-c, 591a, 593a-b, 95a-b, 114, 119/Corn A/Site 1	13.52	2.51	1.03	67.08	0.07	2.9	5.17	0.9	1.1	1	0.2	1.26	0.96	0.07	1.76	0.46		0.08	0.070068	0.0270748	0.141088	0.0014966	0.032449	0.0252381	0.0455782	0.0168707	0.00891156	0.014726	0.00238095	0.96	0.07	0.0514966	0.049932
2021-03-02			Spectrum 2	AM83-2i1-2, 2th, 16a-c, 34a-b, 39, 45, 47, 56a-c/Corn A/Site 1	13.62	2.55	0.98	66.97	0.06	2.96	5.09	0.91	1.12	0.95	0.15	1.25	0.82	0.27	1.81	0.49		0.02	0.030068	0.0229252	0.251088	0.0114966	0.027551	0.105238	0.0555782	0.0368707	0.0589116	0.035274	0.00761905	0.82	0.27	0.101497	0.019932
			Spectrum 3	AM83-2i1-2, 2th, 16a-c, 34a-b, 39, 45, 47, 56a-c/Corn A/Site 1	13.64	2.56	1.06	67.07	0.07	2.95	5.21	0.72	1.01	0.98	0.21	1.27	0.92	0.05	1.68	0.62		0.04	0.020068	0.0570748	0.151088	0.0014966	0.017551	0.0147619	0.134422	0.0731293	0.0289116	0.024726	0.012381	0.92	0.05	0.0285034	0.110068
			Spectrum 4	AM83-2i1-2, 2th, 16a-c, 34a-b, 39, 45, 47, 56a-c/Corn A/Site 1	13.62	2.61	1.03	67.07	0.08	2.92	5.16	0.82	1.11	0.94	0.19	1.32	0.85	0.15	1.68	0.47		0.02	0.029932	0.0270748	0.151088	0.0085034	0.012449	0.0352381	0.0344218	0.0268707	0.0689116	0.00472603	0.062381	0.85	0.15	0.0285034	0.039932
			Spectrum 5	AM83-2i1-2, 2th, 16a-c, 34a-b, 39, 45, 47, 56a-c/Corn A/Site 1	13.54	2.59	0.95	67.09	0.08	2.92	5.15	0.85	1.01	1.11	0.19	1.29	0.83	0.2	1.79	0.42		0.06	0.00993197	0.0529252	0.131088	0.0085034	0.012449	0.0452381	0.00442177	0.0731293	0.101088	0.00472603	0.032381	0.83	0.2	0.0814966	0.089932
			Spectrum 6	AM83-2i1-2, 2th, 16a-c, 34a-b, 39, 45, 47, 56a-c/Corn A/Site 1	13.57	2.67	1.12	66.94	0.08	2.88	5.12	0.81	1.09	1.11	0.15	1.33	0.86	0.19	1.63	0.45		0.03	0.089932	0.117075	0.281088	0.0085034	0.052449	0.0752381	0.0444218	0.00687075	0.101088	0.035274	0.072381	0.86	0.19	0.0785034	0.059932
			Spectrum 112	AM83-2i1-2, 2th, 16a-c, 34a-b, 39, 45, 47, 56a-c/Corn A/Site 1	13.6	2.56	0.97	67.19	0.06	2.92	5.23	0.93	1.06	1	0.15	1.2	0.91	0.08	1.73	0.42		1.06581e-14	0.020068	0.0329252	0.0310884	0.0114966	0.012449	0.0347619	0.0755782	0.0231293	0.00891156	0.035274	0.057619	0.91	0.08	0.0214966	0.089932
			Spectrum 113	AM83-2i1-2, 2th, 16a-c, 34a-b, 39, 45, 47, 56a-c/Corn A/Site 1	13.55	2.62	1	67.05	0.06	2.9	5.17	0.84	1.09	1.07	0.17	1.23	0.87	0.14	1.7	0.55		0.05	0.039932	0.00292517	0.171088	0.0114966	0.032449	0.0252381	0.0144218	0.00687075	0.0610884	0.015274	0.027619	0.87	0.14	0.0085034	0.040068
			Spectrum 114	AM83-2i1-2, 2th, 16a-c, 34a-b, 39, 45, 47, 56a-c/Corn A/Site 1	13.54	2.56	1	67.21	0.09	2.96	5.15	0.9	1.12	1	0.24	1.25	0.88	0.04	1.62	0.44		0.06	0.020068	0.00292517	0.0110884	0.0185034	0.027551	0.0452381	0.0455782	0.0368707	0.00891156	0.054726	0.00761905	0.88	0.04	0.0885034	0.069932
			Spectrum 115	AM83-2i1-2, 2th, 16a-c, 34a-b, 39, 45, 47, 56a-c/Corn A/Site 1	13.59	2.58	1.02	67.12	0.08	2.93	5.15	0.84	1.11	1.03	0.22	1.25	0.91	0.07	1.58	0.52		0.01	6.80272e-05	0.0170748	0.101088	0.0085034	0.00244898	0.0452381	0.0144218	0.0268707	0.0210884	0.034726	0.00761905	0.91	0.07	0.128503	0.010068
			Spectrum 116	AM83-2i1-2, 2th, 16a-c, 34a-b, 39, 45, 47, 56a-c/Corn A/Site 1	13.59	2.57	1.02	67.26	0.1	2.91	5.23	0.84	1.12	1.01	0.18	1.23	0.83	0.03	1.63	0.46		0.01	0.010068	0.0170748	0.0389116	0.0285034	0.022449	0.0347619	0.0144218	0.0368707	0.00108844	0.00527397	0.027619	0.83	0.03	0.0785034	0.049932
2021-03-09			Spectrum 1	AM84-4a1-3, 4b1-3, 4c, 4d, 4e1-3, 4f1-5/Corn A/Site 1	13.68	2.55	1.01	67.07	0.07	2.88	5.13	0.87	1.08	1	0.11	1.26	0.83	0.14	1.77	0.54		0.08	0.030068	0.00707483	0.151088	0.0014966	0.052449	0.0652381	0.0155782	0.00312925	0.00891156	0.075274	0.00238095	0.83	0.14	0.0614966	0.030068
			Spectrum 2	AM84-4a1-3, 4b1-3, 4c, 4d, 4e1-3, 4f1-5/Corn A/Site 1	13.7	2.57	1.01	67.03	0.05	2.91	5.11	0.84	1.12	1.02	0.15	1.25	0.9	0.13	1.7	0.53		0.1	0.010068	0.00707483	0.191088	0.0214966	0.022449	0.0852381	0.0144218	0.0368707	0.0110884	0.035274	0.00761905	0.9	0.13	0.0085034	0.020068
			Spectrum 3	AM84-4a1-3, 4b1-3, 4c, 4d, 4e1-3, 4f1-5/Corn A/Site 1	13.63	2.59	0.98	66.88	0.09	3.03	5.07	0.88	1.03	1.01	0.23	1.25	0.94	0.23	1.64	0.52		0.03	0.00993197	0.0229252	0.341088	0.0185034	0.097551	0.125238	0.0255782	0.0531293	0.00108844	0.044726	0.00761905	0.94	0.23	0.0685034	0.010068
			Spectrum 4	AM84-4a1-3, 4b1-3, 4c, 4d, 4e1-3, 4f1-5/Corn A/Site 1	13.63	2.58	1.02	66.9	0.08	2.93	5.16	0.8	1.02	1.04	0.2	1.3	0.83	0.17	1.83	0.52		0.03	6.80272e-05	0.0170748	0.321088	0.0085034	0.00244898	0.0352381	0.0544218	0.0631293	0.0310884	0.014726	0.042381	0.83	0.17	0.121497	0.010068
			Spectrum 5	AM84-4a1-3, 4b1-3, 4c, 4d, 4e1-3, 4f1-5/Corn A/Site 1	13.66	2.57	1	67.04	0.08	2.94	5.14	0.84	1.07	0.99	0.14	1.27	0.77	0.19	1.73	0.56		0.06	0.010068	0.00292517	0.181088	0.0085034	0.00755102	0.0552381	0.0144218	0.0131293	0.0189116	0.045274	0.012381	0.77	0.19	0.0214966	0.050068
			Spectrum 113	AM84-4a1-3, 4b1-3, 4c, 4d, 4e1-3, 4f1-5/Corn A/Site 1	13.67	2.59	0.99	66.94	0.07	2.91	5.12	0.89	1.12	1.04	0.18	1.18	0.85	0.26	1.73	0.46		0.07	0.00993197	0.0129252	0.281088	0.0014966	0.022449	0.0752381	0.0355782	0.0368707	0.0310884	0.00527397	0.077619	0.85	0.26	0.0214966	0.049932
			Spectrum 114	AM84-4a1-3, 4b1-3, 4c, 4d, 4e1-3, 4f1-5/Corn A/Site 1	13.63	2.56	1	66.9	0.09	2.93	5.15	0.84	1.05	1.01	0.22	1.18	0.89	0.21	1.78	0.57		0.03	0.020068	0.00292517	0.321088	0.0185034	0.00244898	0.0452381	0.0144218	0.0331293	0.00108844	0.034726	0.077619	0.89	0.21	0.0714966	0.060068
			Spectrum 115	AM84-4a1-3, 4b1-3, 4c, 4d, 4e1-3, 4f1-5/Corn A/Site 1	13.65	2.58	1.07	67.18	0.08	2.89	5.23	0.92	1.04	0.99	0.18	1.21	0.86	0	1.72	0.41		0.05	6.80272e-05	0.0670748	0.0410884	0.0085034	0.042449	0.0347619	0.0655782	0.0431293	0.0189116	0.00527397	0.047619	0.86	0	0.0114966	0.099932
			Spectrum 116	AM84-4a1-3, 4b1-3, 4c, 4d, 4e1-3, 4f1-5/Corn A/Site 1	13.61	2.57	1.03	67.2	0.06	2.95	5.15	0.82	1.09	1	0.19	1.25	0.75	0.23	1.58	0.51		0.01	0.010068	0.0270748	0.0210884	0.0114966	0.017551	0.0452381	0.0344218	0.00687075	0.00891156	0.00472603	0.00761905	0.75	0.23	0.128503	6.80272e-05
			Spectrum 117	AM84-4a1-3, 4b1-3, 4c, 4d, 4e1-3, 4f1-5/Corn A/Site 1	13.61	2.64	1.01	67.12	0.09	2.93	5.1	0.9	1.09	1.01	0.2	1.29	0.91	0	1.68	0.43		0.01	0.059932	0.00707483	0.101088	0.0185034	0.00244898	0.0952381	0.0455782	0.00687075	0.00108844	0.014726	0.032381	0.91	0	0.0285034	0.079932
2021-03-18				AM84-31a-b, 55a-e, 66a-c/Corn A/Site 1	13.55	2.56	1.07	67.21	0.05	2.97	5.17	0.87	1	1.06	0.19	1.27	0.87	0.01	1.71	0.45		0.05	0.020068	0.0670748	0.0110884	0.0214966	0.037551	0.0252381	0.0155782	0.0831293	0.0510884	0.00472603	0.012381	0.87	0.01	0.0014966	0.059932
				AM84-31a-b, 55a-e, 66a-c/Corn A/Site 1	13.48	2.59	1.01	67.05	0.05	2.97	5.27	0.86	1.03	1.02	0.17	1.21	0.9	0.13	1.75	0.52		0.12	0.00993197	0.00707483	0.171088	0.0214966	0.037551	0.0747619	0.00557823	0.0531293	0.0110884	0.015274	0.047619	0.9	0.13	0.0414966	0.010068
				AM84-31a-b, 55a-e, 66a-c/Corn A/Site 1	13.45	2.53	0.98	67.25	0.06	2.96	5.17	0.86	1.09	1.02	0.18	1.21	0.75	0.24	1.7	0.55		0.15	0.050068	0.0229252	0.0289116	0.0114966	0.027551	0.0252381	0.00557823	0.00687075	0.0110884	0.00527397	0.047619	0.75	0.24	0.0085034	0.040068
				AM84-31a-b, 55a-e, 66a-c/Corn A/Site 1	13.53	2.55	1.07	67.09	0.07	2.95	5.16	0.84	1.04	1.04	0.15	1.28	0.84	0.21	1.66	0.52		0.07	0.030068	0.0670748	0.131088	0.0014966	0.017551	0.0352381	0.0144218	0.0431293	0.0310884	0.035274	0.022381	0.84	0.21	0.0485034	0.010068
				AM84-31a-b, 55a-e, 66a-c/Corn A/Site 1	13.52	2.53	0.99	67.2	0.06	2.97	5.24	0.83	1.07	0.93	0.15	1.27	0.91	0.15	1.61	0.55		0.08	0.050068	0.0129252	0.0210884	0.0114966	0.037551	0.0447619	0.0244218	0.0131293	0.0789116	0.035274	0.012381	0.91	0.15	0.0985034	0.040068
				AM84-31a-b, 55a-e, 66a-c/Corn A/Site 1	13.53	2.55	1.02	67.17	0.08	2.89	5.22	0.86	1.05	1.02	0.21	1.26	0.87	0.04	1.72	0.48		0.07	0.030068	0.0170748	0.0510884	0.0085034	0.042449	0.0247619	0.00557823	0.0331293	0.0110884	0.024726	0.00238095	0.87	0.04	0.0114966	0.029932
				AM84-31a-b, 55a-e, 66a-c/Corn A/Site 1	13.47	2.57	1.01	67.06	0.07	2.91	5.19	0.93	1.06	0.99	0.18	1.24	0.95	0.24	1.73	0.4		0.13	0.010068	0.00707483	0.161088	0.0014966	0.022449	0.0052381	0.0755782	0.0231293	0.0189116	0.00527397	0.017619	0.95	0.24	0.0214966	0.109932
				AM84-31a-b, 55a-e, 66a-c/Corn A/Site 1	13.51	2.6	0.99	67.12	0.08	2.94	5.18	0.86	1.09	0.99	0.22	1.31	0.84	0.06	1.69	0.51		0.09	0.019932	0.0129252	0.101088	0.0085034	0.00755102	0.0152381	0.00557823	0.00687075	0.0189116	0.034726	0.052381	0.84	0.06	0.0185034	6.80272e-05
				AM84-31a-b, 55a-e, 66a-c/Corn A/Site 1	13.61	2.61	0.95	66.94	0.06	2.97	5.18	0.89	1.08	1.01	0.19	1.26	0.94	0.21	1.65	0.45		0.01	0.029932	0.0529252	0.281088	0.0114966	0.037551	0.0152381	0.0355782	0.00312925	0.00108844	0.00472603	0.00238095	0.94	0.21	0.0585034	0.059932
				AM84-31a-b, 55a-e, 66a-c/Corn A/Site 1	13.55	2.56	1.01	67.16	0.05	2.92	5.26	0.78	1.08	0.93	0.16	1.13	0.87	0.19	1.75	0.6		0.05	0.020068	0.00707483	0.0610884	0.0214966	0.012449	0.0647619	0.0744218	0.00312925	0.0789116	0.025274	0.127619	0.87	0.19	0.0414966	0.090068
2021-03-23			Spectrum 2	AM85-124c1-2, 125.1-3, 125a1-3/Corn A/Site 1	13.61	2.62	0.97	66.99	0.07	2.93	5.18	0.86	1.08	1.03	0.21	1.29	0.6	0.18	1.86	0.51		0.01	0.039932	0.0329252	0.231088	0.0014966	0.00244898	0.0152381	0.00557823	0.00312925	0.0210884	0.024726	0.032381	0.6	0.18	0.151497	6.80272e-05
			Spectrum 3	AM85-124c1-2, 125.1-3, 125a1-3/Corn A/Site 1	13.6	2.53	1.06	67.24	0.07	2.95	5.17	0.82	1.08	0.95	0.2	1.23	0.58	0.18	1.7	0.63		1.06581e-14	0.050068	0.0570748	0.0189116	0.0014966	0.017551	0.0252381	0.0344218	0.00312925	0.0589116	0.014726	0.027619	0.58	0.18	0.0085034	0.120068
			Spectrum 4	AM85-124c1-2, 125.1-3, 125a1-3/Corn A/Site 1	13.7	2.6	0.96	67.66	0.07	2.92	5.22	0.85	1.11	1	0.19	1.18	0.51	0	1.58	0.44		0.1	0.019932	0.0429252	0.438912	0.0014966	0.012449	0.0247619	0.00442177	0.0268707	0.00891156	0.00472603	0.077619	0.51	0	0.128503	0.069932
			Spectrum 5	AM85-124c1-2, 125.1-3, 125a1-3/Corn A/Site 1	13.69	2.62	1.04	67.31	0.06	2.98	5.14	0.8	1.12	0.98	0.17	1.2	0.48	0.21	1.65	0.54		0.09	0.039932	0.0370748	0.0889116	0.0114966	0.047551	0.0552381	0.0544218	0.0368707	0.0289116	0.015274	0.057619	0.48	0.21	0.0585034	0.030068
			Spectrum 6	AM85-124c1-2, 125.1-3, 125a1-3/Corn A/Site 1	13.56	2.64	1.01	67.47	0.07	2.95	5.16	0.79	1.07	1.02	0.19	1.28	0.52	0.07	1.61	0.58		0.04	0.059932	0.00707483	0.248912	0.0014966	0.017551	0.0352381	0.0644218	0.0131293	0.0110884	0.00472603	0.022381	0.52	0.07	0.0985034	0.070068
			Spectrum 76	AM85-124c1-2, 125.1-3, 125a1-3/Corn A/Site 1	13.57	2.59	1	67.27	0.08	2.93	5.23	0.85	1.09	0.98	0.19	1.19	0.61	0.13	1.79	0.49		0.03	0.00993197	0.00292517	0.0489116	0.0085034	0.00244898	0.0347619	0.00442177	0.00687075	0.0289116	0.00472603	0.067619	0.61	0.13	0.0814966	0.019932
			Spectrum 77	AM85-124c1-2, 125.1-3, 125a1-3/Corn A/Site 1	13.54	2.61	1.02	67.23	0.07	2.94	5.19	0.86	1.06	1	0.23	1.15	0.63	0.15	1.83	0.48		0.06	0.029932	0.0170748	0.00891156	0.0014966	0.00755102	0.0052381	0.00557823	0.0231293	0.00891156	0.044726	0.107619	0.63	0.15	0.121497	0.029932
			Spectrum 78	AM85-124c1-2, 125.1-3, 125a1-3/Corn A/Site 1	13.59	2.55	0.98	67.62	0.04	2.91	5.2	0.84	1.08	1.05	0.17	1.18	0.58	0	1.69	0.51		0.01	0.030068	0.0229252	0.398912	0.0314966	0.022449	0.0047619	0.0144218	0.00312925	0.0410884	0.015274	0.077619	0.58	0	0.0185034	6.80272e-05
			Spectrum 79	AM85-124c1-2, 125.1-3, 125a1-3/Corn A/Site 1	13.62	2.59	1.01	67.05	0.07	2.93	5.21	0.8	1.06	1.02	0.17	1.19	0.7	0.22	1.85	0.52		0.02	0.00993197	0.00707483	0.171088	0.0014966	0.00244898	0.0147619	0.0544218	0.0231293	0.0110884	0.015274	0.067619	0.7	0.22	0.141497	0.010068
			Spectrum 80	AM85-124c1-2, 125.1-3, 125a1-3/Corn A/Site 1	13.56	2.67	0.98	67.41	0.06	2.93	5.25	0.84	1.07	1.06	0.16	1.23	0.56	0	1.68	0.55		0.04	0.089932	0.0229252	0.188912	0.0114966	0.00244898	0.0547619	0.0144218	0.0131293	0.0510884	0.025274	0.027619	0.56	0	0.0285034	0.040068
2021-03-30			Spectrum 1	AM85-126-133-134.1-3, 135, 149.1-5, 178/Corn A/Site 1	13.69	2.6	0.99	67.2	0.07	2.92	5.23	0.82	1.08	1.01	0.13	1.29	0.59	0.06	1.76	0.57		0.09	0.019932	0.0129252	0.0210884	0.0014966	0.012449	0.0347619	0.0344218	0.00312925	0.00108844	0.055274	0.032381	0.59	0.06	0.0514966	0.060068
			Spectrum 2	AM85-126-133-134.1-3, 135, 149.1-5, 178/Corn A/Site 1	13.69	2.58	1.01	67.3	0.07	2.93	5.2	0.82	1.12	1	0.2	1.27	0.57	0.09	1.63	0.53		0.09	6.80272e-05	0.00707483	0.0789116	0.0014966	0.00244898	0.0047619	0.0344218	0.0368707	0.00891156	0.014726	0.012381	0.57	0.09	0.0785034	0.020068
			Spectrum 3	AM85-126-133-134.1-3, 135, 149.1-5, 178/Corn A/Site 1	13.6	2.57	1.01	67.34	0.08	2.94	5.22	0.82	1.07	1.01	0.17	1.24	0.56	0.13	1.69	0.55		1.06581e-14	0.010068	0.00707483	0.118912	0.0085034	0.00755102	0.0247619	0.0344218	0.0131293	0.00108844	0.015274	0.017619	0.56	0.13	0.0185034	0.040068
			Spectrum 4	AM85-126-133-134.1-3, 135, 149.1-5, 178/Corn A/Site 1	13.66	2.56	1.02	67.31	0.06	2.87	5.18	0.89	1.07	1	0.19	1.21	0.61	0.06	1.77	0.54		0.06	0.020068	0.0170748	0.0889116	0.0114966	0.062449	0.0152381	0.0355782	0.0131293	0.00891156	0.00472603	0.047619	0.61	0.06	0.0614966	0.030068
			Spectrum 5	AM85-126-133-134.1-3, 135, 149.1-5, 178/Corn A/Site 1	13.58	2.62	0.99	67.11	0.08	2.98	5.19	0.88	1.12	1.04	0.21	1.26	0.58	0.16	1.7	0.49		0.02	0.039932	0.0129252	0.111088	0.0085034	0.047551	0.0052381	0.0255782	0.0368707	0.0310884	0.024726	0.00238095	0.58	0.16	0.0085034	0.019932
			Spectrum 86	AM85-126-133-134.1-3, 135, 149.1-5, 178/Corn A/Site 1	13.61	2.59	1	67.36	0.08	2.91	5.2	0.88	1.04	1.05	0.18	1.23	0.59	0.14	1.66	0.48		0.01	0.00993197	0.00292517	0.138912	0.0085034	0.022449	0.0047619	0.0255782	0.0431293	0.0410884	0.00527397	0.027619	0.59	0.14	0.0485034	0.029932
			Spectrum 87	AM85-126-133-134.1-3, 135, 149.1-5, 178/Corn A/Site 1	13.62	2.63	0.98	67.33	0.09	2.96	5.19	0.85	1.1	1.02	0.14	1.26	0.68	0.09	1.53	0.53		0.02	0.049932	0.0229252	0.108912	0.0185034	0.027551	0.0052381	0.00442177	0.0168707	0.0110884	0.045274	0.00238095	0.68	0.09	0.178503	0.020068
			Spectrum 88	AM85-126-133-134.1-3, 135, 149.1-5, 178/Corn A/Site 1	13.6	2.56	0.99	67.16	0.05	2.96	5.19	0.91	1.1	1.05	0.2	1.33	0.55	0.17	1.72	0.46		1.06581e-14	0.020068	0.0129252	0.0610884	0.0214966	0.027551	0.0052381	0.0555782	0.0168707	0.0410884	0.014726	0.072381	0.55	0.17	0.0114966	0.049932
			Spectrum 89	AM85-126-133-134.1-3, 135, 149.1-5, 178/Corn A/Site 1	13.65	2.57	0.98	67.2	0.07	2.98	5.13	0.91	1.08	1.03	0.2	1.24	0.76	0.17	1.61	0.43		0.05	0.010068	0.0229252	0.0210884	0.0014966	0.047551	0.0652381	0.0555782	0.00312925	0.0210884	0.014726	0.017619	0.76	0.17	0.0985034	0.079932
			Spectrum 90	AM85-126-133-134.1-3, 135, 149.1-5, 178/Corn A/Site 1	13.51	2.58	0.96	67.31	0.06	2.92	5.27	0.82	1.15	0.95	0.22	1.23	0.61	0.09	1.7	0.62		0.09	6.80272e-05	0.0429252	0.0889116	0.0114966	0.012449	0.0747619	0.0344218	0.0668707	0.0589116	0.034726	0.027619	0.61	0.09	0.0085034	0.110068
2021-04-05			Spectrum 1	AM89-89_7-8-9.1-3, 25.1-4, 34a1-4, 34b1-2, 39.1-2, 103/Corn A/Site 1	13.57	2.58	1.02	67.37	0.08	2.9	5.28	0.81	1.14	0.98	0.13	1.22	0.5	0.08	1.75	0.59		0.03	6.80272e-05	0.0170748	0.148912	0.0085034	0.032449	0.0847619	0.0444218	0.0568707	0.0289116	0.055274	0.037619	0.5	0.08	0.0414966	0.080068
			Spectrum 2	AM89-89_7-8-9.1-3, 25.1-4, 34a1-4, 34b1-2, 39.1-2, 103/Corn A/Site 1	13.62	2.56	1.07	67.33	0.04	2.9	5.22	0.87	1.13	1.02	0.17	1.2	0.59	0.13	1.69	0.45		0.02	0.020068	0.0670748	0.108912	0.0314966	0.032449	0.0247619	0.0155782	0.0468707	0.0110884	0.015274	0.057619	0.59	0.13	0.0185034	0.059932
			Spectrum 3	AM89-89_7-8-9.1-3, 25.1-4, 34a1-4, 34b1-2, 39.1-2, 103/Corn A/Site 1	13.54	2.62	1.03	67.56	0.05	2.94	5.14	0.8	1.09	1.01	0.18	1.19	0.64	0.13	1.55	0.52		0.06	0.039932	0.0270748	0.338912	0.0214966	0.00755102	0.0552381	0.0544218	0.00687075	0.00108844	0.00527397	0.067619	0.64	0.13	0.158503	0.010068
			Spectrum 4	AM89-89_7-8-9.1-3, 25.1-4, 34a1-4, 34b1-2, 39.1-2, 103/Corn A/Site 1	13.52	2.57	1.02	67.44	0.05	2.93	5.22	0.86	1.1	1.01	0.15	1.25	0.59	0.08	1.6	0.59		0.08	0.010068	0.0170748	0.218912	0.0214966	0.00244898	0.0247619	0.00557823	0.0168707	0.00108844	0.035274	0.00761905	0.59	0.08	0.108503	0.080068
			Spectrum 5	AM89-89_7-8-9.1-3, 25.1-4, 34a1-4, 34b1-2, 39.1-2, 103/Corn A/Site 1	13.48	2.6	1.07	67.15	0.07	2.93	5.23	0.91	1.07	0.95	0.21	1.34	0.57	0.24	1.71	0.48		0.12	0.019932	0.0670748	0.0710884	0.0014966	0.00244898	0.0347619	0.0555782	0.0131293	0.0589116	0.024726	0.082381	0.57	0.24	0.0014966	0.029932
			Spectrum 110	AM89-89_7-8-9.1-3, 25.1-4, 34a1-4, 34b1-2, 39.1-2, 103/Corn A/Site 1	13.71	2.58	1.01	67.06	0.14	2.96	5.12	0.87	1.11	1.01	0.23	1.3	0.59	0.1	1.7	0.51		0.11	6.80272e-05	0.00707483	0.161088	0.0685034	0.027551	0.0752381	0.0155782	0.0268707	0.00108844	0.044726	0.042381	0.59	0.1	0.0085034	6.80272e-05
			Spectrum 111	AM89-89_7-8-9.1-3, 25.1-4, 34a1-4, 34b1-2, 39.1-2, 103/Corn A/Site 1	13.56	2.63	0.95	67.29	0.14	2.95	5.23	0.86	1.09	1.06	0.2	1.18	0.64	0.11	1.59	0.52		0.04	0.049932	0.0529252	0.0689116	0.0685034	0.017551	0.0347619	0.00557823	0.00687075	0.0510884	0.014726	0.077619	0.64	0.11	0.118503	0.010068
			Spectrum 112	AM89-89_7-8-9.1-3, 25.1-4, 34a1-4, 34b1-2, 39.1-2, 103/Corn A/Site 1	13.56	2.58	0.98	67.28	0.15	2.92	5.2	0.85	1.06	1.02	0.16	1.26	0.64	0.1	1.63	0.61		0.04	6.80272e-05	0.0229252	0.0589116	0.0785034	0.012449	0.0047619	0.00442177	0.0231293	0.0110884	0.025274	0.00238095	0.64	0.1	0.0785034	0.100068
			Spectrum 113	AM89-89_7-8-9.1-3, 25.1-4, 34a1-4, 34b1-2, 39.1-2, 103/Corn A/Site 1	13.58	2.61	0.98	67.17	0.15	2.94	5.16	0.85	1.02	1.05	0.17	1.27	0.58	0.18	1.74	0.55		0.02	0.029932	0.0229252	0.0510884	0.0785034	0.00755102	0.0352381	0.00442177	0.0631293	0.0410884	0.015274	0.012381	0.58	0.18	0.0314966	0.040068
			Spectrum 114	AM89-89_7-8-9.1-3, 25.1-4, 34a1-4, 34b1-2, 39.1-2, 103/Corn A/Site 1	13.62	2.6	1	67.16	0.15	2.95	5.18	0.81	1.1	1	0.18	1.29	0.61	0.17	1.7	0.47		0.02	0.019932	0.00292517	0.0610884	0.0785034	0.017551	0.0152381	0.0444218	0.0168707	0.00891156	0.00527397	0.032381	0.61	0.17	0.0085034	0.039932
				Corn A (n=147)	Na2O	MgO	Al2O3	SiO2	SO3	K2O	CaO	TiO2	MnO	FeO	CoO	CuO	SrO	SnO	Sb2O5	BaO
				Measured	13.6	2.58007	1.00293	67.2211	0.0714966	2.93245	5.19524	0.854422	1.08313	1.00891	0.185274	1.25762			1.7085	0.509932
				Published	14.3	2.66	1	66.56	0.14	2.87	5.03	0.79	1	0.98	0.17	1.17			1.75	0.46
				Error	-4.8951	-3.00496	0.292517	0.993222	-48.931	2.17592	3.28505	8.15465	8.31293	2.95016	8.98469	7.48881			-2.37123	10.8548
				Presicion	0.0653061	0.0275589	0.0229349	0.127609	0.0126827	0.0262391	0.0384775	0.0307548	0.0259401	0.0279874	0.0247148	0.037564			0.0615679	0.0460641

## Sheet: Corn B
															Fe203
															0.34
					17	1.03	4.36	61.55	0.82	0.49	0.16	1	8.56	0.25	0.305694	2.66	0.19	0.46	0.61
			Spectrum Label	Project Path	Na2O	MgO	Al2O3	SiO2	P2O5	SO3	Cl	K2O	CaO	MnO	FeO	CuO	ZnO	Sb2O5	PbO		Na2O	MgO	Al2O3	SiO2	P2O5	SO3	Cl	K2O	CaO	MnO	FeO	CuO	ZnO	Sb2O5	PbO
2021-01-28			Spectrum 6	AM77-28j, 28n, 36a-b, 37b, 37d/Corn B/Site 1	16.13	1.04	4.25	62.44	0.78	0.22	0.13	1.08	8.88	0.32	0.34	3.03	0.21	0.54	0.6		0.0040411	0.00917808	0.0104795	0.221164	0.0193151	0.029726	0.0329452	0.0188356	0.0591781	0.0565753	0.0160274	0.101918	0.0105517	0.0893836	0.0735616
			Spectrum 7	AM77-28j, 28n, 36a-b, 37b, 37d/Corn B/Site 1	16.22	1.06	4.21	62.66	0.73	0.24	0.15	1.05	8.97	0.28	0.34	2.94	0.16	0.38	0.59		0.0940411	0.0108219	0.0295205	0.00116438	0.0693151	0.00972603	0.0129452	0.0111644	0.0308219	0.0165753	0.0160274	0.0119178	0.0605517	0.0706164	0.0635616
			Spectrum 8	AM77-28j, 28n, 36a-b, 37b, 37d/Corn B/Site 1	16.08	1.02	4.26	62.82	0.78	0.23	0.19	1.07	8.93	0.28	0.28	2.96	0.11	0.47	0.51		0.0459589	0.0291781	0.0204795	0.158836	0.0193151	0.019726	0.0270548	0.00883562	0.00917808	0.0165753	0.0439726	0.0319178	0.110552	0.0193836	0.0164384
			Spectrum 9	AM77-28j, 28n, 36a-b, 37b, 37d/Corn B/Site 1	16.17	1.06	4.27	62.56	0.79	0.24	0.19	1.06	8.98	0.26	0.34	2.94	0.24	0.4	0.5		0.0440411	0.0108219	0.0304795	0.101164	0.00931507	0.00972603	0.0270548	0.00116438	0.0408219	0.00342466	0.0160274	0.0119178	0.0194483	0.0506164	0.0264384
			Spectrum 10	AM77-28j, 28n, 36a-b, 37b, 37d/Corn B/Site 1	16.25	1.06	4.22	62.62	0.85	0.23	0.17	1.03	8.89	0.29	0.32	2.85	0.26	0.42	0.52		0.124041	0.0108219	0.0195205	0.0411644	0.0506849	0.019726	0.00705479	0.0311644	0.0491781	0.0265753	0.0039726	0.0780822	0.0394483	0.0306164	0.00643836
			Spectrum 76	AM77-28j, 28n, 36a-b, 37b, 37d/Corn B/Site 1	16.24	1.05	4.19	62.77	0.8	0.23	0.16	1.06	8.94	0.24	0.31	2.9	0.15	0.38	0.58		0.114041	0.000821918	0.0495205	0.108836	0.000684932	0.019726	0.00294521	0.00116438	0.000821918	0.0234247	0.0139726	0.0280822	0.0705517	0.0706164	0.0535616
			Spectrum 77	AM77-28j, 28n, 36a-b, 37b, 37d/Corn B/Site 1	16.15	1.07	4.22	62.76	0.8	0.25	0.16	1.06	8.93	0.24	0.26	2.96	0.2	0.44	0.5		0.0240411	0.0208219	0.0195205	0.0988356	0.000684932	0.000273973	0.00294521	0.00116438	0.00917808	0.0234247	0.0639726	0.0319178	0.0205517	0.0106164	0.0264384
			Spectrum 78	AM77-28j, 28n, 36a-b, 37b, 37d/Corn B/Site 1	16.25	1.01	4.23	62.69	0.81	0.23	0.16	1.07	8.91	0.25	0.34	2.88	0.25	0.4	0.53		0.124041	0.0391781	0.00952055	0.0288356	0.0106849	0.019726	0.00294521	0.00883562	0.0291781	0.0134247	0.0160274	0.0480822	0.0294483	0.0506164	0.00356164
			Spectrum 79	AM77-28j, 28n, 36a-b, 37b, 37d/Corn B/Site 1	16.16	1.08	4.22	62.57	0.75	0.27	0.16	1.07	8.91	0.29	0.31	2.93	0.2	0.46	0.61		0.0340411	0.0308219	0.0195205	0.0911644	0.0493151	0.020274	0.00294521	0.00883562	0.0291781	0.0265753	0.0139726	0.00191781	0.0205517	0.00938356	0.0835616
			Spectrum 80	AM77-28j, 28n, 36a-b, 37b, 37d/Corn B/Site 1	16.16	1.03	4.27	62.71	0.77	0.23	0.18	1.08	9.01	0.3	0.3	2.85	0.26	0.35	0.51		0.0340411	0.0191781	0.0304795	0.0488356	0.0293151	0.019726	0.0170548	0.0188356	0.0708219	0.0365753	0.0239726	0.0780822	0.0394483	0.100616	0.0164384
2021-02-02			Spectrum 6	AM77-38a1-5, 39b1-4/Corn B/Site 1	16.11	1	4.25	62.9	0.79	0.23	0.17	1.06	8.87	0.28	0.3	2.83	0.19	0.46	0.55		0.0159589	0.0491781	0.0104795	0.238836	0.00931507	0.019726	0.00705479	0.00116438	0.0691781	0.0165753	0.0239726	0.0980822	0.0305517	0.00938356	0.0235616
			Spectrum 7	AM77-38a1-5, 39b1-4/Corn B/Site 1	15.89	1.02	4.24	62.84	0.81	0.22	0.2	1.02	8.96	0.22	0.29	2.95	0.28	0.53	0.53		0.235959	0.0291781	0.000479452	0.178836	0.0106849	0.029726	0.0370548	0.0411644	0.0208219	0.0434247	0.0339726	0.0219178	0.0594483	0.0793836	0.00356164
			Spectrum 8	AM77-38a1-5, 39b1-4/Corn B/Site 1	16.04	1.04	4.24	62.84	0.77	0.25	0.17	1.07	8.93	0.26	0.36	3.02	0.21	0.33	0.47		0.0859589	0.00917808	0.000479452	0.178836	0.0293151	0.000273973	0.00705479	0.00883562	0.00917808	0.00342466	0.0360274	0.0919178	0.0105517	0.120616	0.0564384
			Spectrum 9	AM77-38a1-5, 39b1-4/Corn B/Site 1	16.11	1.04	4.25	62.58	0.74	0.24	0.17	1.09	8.99	0.29	0.28	2.95	0.22	0.54	0.5		0.0159589	0.00917808	0.0104795	0.0811644	0.0593151	0.00972603	0.00705479	0.0288356	0.0508219	0.0265753	0.0439726	0.0219178	0.000551724	0.0893836	0.0264384
			Spectrum 10	AM77-38a1-5, 39b1-4/Corn B/Site 1	16.07	1.07	4.18	62.7	0.74	0.24	0.17	1.06	8.98	0.27	0.38	2.92	0.18	0.57	0.48		0.0559589	0.0208219	0.0595205	0.0388356	0.0593151	0.00972603	0.00705479	0.00116438	0.0408219	0.00657534	0.0560274	0.00808219	0.0405517	0.119384	0.0464384
			Spectrum 82	AM77-38a1-5, 39b1-4/Corn B/Site 1	16.08	1.04	4.25	62.49	0.86	0.24	0.17	1.04	9.04	0.31	0.31	2.97	0.23	0.47	0.51		0.0459589	0.00917808	0.0104795	0.171164	0.0606849	0.00972603	0.00705479	0.0211644	0.100822	0.0465753	0.0139726	0.0419178	0.00944828	0.0193836	0.0164384
			Spectrum 83	AM77-38a1-5, 39b1-4/Corn B/Site 1	15.99	1.03	4.26	62.62	0.8	0.21	0.11	1.07	9.08	0.29	0.34	2.98	0.31	0.49	0.42		0.135959	0.0191781	0.0204795	0.0411644	0.000684932	0.039726	0.0529452	0.00883562	0.140822	0.0265753	0.0160274	0.0519178	0.0894483	0.0393836	0.106438
			Spectrum 84	AM77-38a1-5, 39b1-4/Corn B/Site 1	16.1	1.09	4.26	62.63	0.82	0.22	0.15	1.06	8.94	0.26	0.32	2.94	0.21	0.45	0.54		0.0259589	0.0408219	0.0204795	0.0311644	0.0206849	0.029726	0.0129452	0.00116438	0.000821918	0.00342466	0.0039726	0.0119178	0.0105517	0.000616438	0.0135616
			Spectrum 85	AM77-38a1-5, 39b1-4/Corn B/Site 1	16.02	1.03	4.24	62.73	0.8	0.21	0.12	1.04	9	0.29	0.31	2.91	0.27	0.45	0.59		0.105959	0.0191781	0.000479452	0.0688356	0.000684932	0.039726	0.0429452	0.0211644	0.0608219	0.0265753	0.0139726	0.0180822	0.0494483	0.000616438	0.0635616
			Spectrum 86	AM77-38a1-5, 39b1-4/Corn B/Site 1	15.85	1.06	4.23	62.7	0.83	0.2	0.14	1.08	9.05	0.27	0.31	2.97	0.22	0.58	0.5		0.275959	0.0108219	0.00952055	0.0388356	0.0306849	0.049726	0.0229452	0.0188356	0.110822	0.00657534	0.0139726	0.0419178	0.000551724	0.129384	0.0264384
2021-02-04			Spectrum 6	AM77-39a, 39b1-3, 39c1-3/Corn B/Site 1	16	1.07	4.27	62.66	0.77	0.27	0.16	1.07	9	0.27	0.33	2.95	0.18	0.51	0.51		0.125959	0.0208219	0.0304795	0.00116438	0.0293151	0.020274	0.00294521	0.00883562	0.0608219	0.00657534	0.0060274	0.0219178	0.0405517	0.0593836	0.0164384
			Spectrum 7	AM77-39a, 39b1-3, 39c1-3/Corn B/Site 1	16.12	1.07	4.18	62.67	0.8	0.23	0.18	1.06	8.97	0.27	0.37	2.9	0.15	0.48	0.55		0.0059589	0.0208219	0.0595205	0.00883562	0.000684932	0.019726	0.0170548	0.00116438	0.0308219	0.00657534	0.0460274	0.0280822	0.0705517	0.0293836	0.0235616
			Spectrum 8	AM77-39a, 39b1-3, 39c1-3/Corn B/Site 1	16.06	1.04	4.26	62.52	0.8	0.25	0.18	1.08	8.97	0.31	0.35	2.91	0.19	0.47	0.61		0.0659589	0.00917808	0.0204795	0.141164	0.000684932	0.000273973	0.0170548	0.0188356	0.0308219	0.0465753	0.0260274	0.0180822	0.0305517	0.0193836	0.0835616
			Spectrum 9	AM77-39a, 39b1-3, 39c1-3/Corn B/Site 1	16.05	1.03	4.2	62.6	0.76	0.24	0.16	1.02	9	0.21	0.29	3.09	0.27	0.63	0.47		0.0759589	0.0191781	0.0395205	0.0611644	0.0393151	0.00972603	0.00294521	0.0411644	0.0608219	0.0534247	0.0339726	0.161918	0.0494483	0.179384	0.0564384
			Spectrum 10	AM77-39a, 39b1-3, 39c1-3/Corn B/Site 1	16	1.09	4.17	62.51	0.78	0.25	0.19	1.05	8.94	0.28	0.34	3.08	0.23	0.54	0.57		0.125959	0.0408219	0.0695205	0.151164	0.0193151	0.000273973	0.0270548	0.0111644	0.000821918	0.0165753	0.0160274	0.151918	0.00944828	0.0893836	0.0435616
			Spectrum 59	AM77-39a, 39b1-3, 39c1-3/Corn B/Site 1	16.03	1.02	4.23	62.64	0.78	0.23	0.2	1.07	8.95	0.26	0.27	2.95	0.31	0.54	0.52		0.0959589	0.0291781	0.00952055	0.0211644	0.0193151	0.019726	0.0370548	0.00883562	0.0108219	0.00342466	0.0539726	0.0219178	0.0894483	0.0893836	0.00643836
			Spectrum 60	AM77-39a, 39b1-3, 39c1-3/Corn B/Site 1	15.8	1.1	4.25	62.73	0.78	0.24	0.16	1.07	9.14	0.27	0.32	2.89	0.29	0.44	0.52		0.325959	0.0508219	0.0104795	0.0688356	0.0193151	0.00972603	0.00294521	0.00883562	0.200822	0.00657534	0.0039726	0.0380822	0.0694483	0.0106164	0.00643836
			Spectrum 61	AM77-39a, 39b1-3, 39c1-3/Corn B/Site 1	16.04	1.02	4.22	62.52	0.77	0.22	0.16	1.06	9.01	0.23	0.32	2.99	0.22	0.62	0.6		0.0859589	0.0291781	0.0195205	0.141164	0.0293151	0.029726	0.00294521	0.00116438	0.0708219	0.0334247	0.0039726	0.0619178	0.000551724	0.169384	0.0735616
			Spectrum 62	AM77-39a, 39b1-3, 39c1-3/Corn B/Site 1	16.08	1.03	4.23	62.66	0.77	0.25	0.18	1.06	9	0.27	0.34	2.91	0.23	0.51	0.49		0.0459589	0.0191781	0.00952055	0.00116438	0.0293151	0.000273973	0.0170548	0.00116438	0.0608219	0.00657534	0.0160274	0.0180822	0.00944828	0.0593836	0.0364384
			Spectrum 63	AM77-39a, 39b1-3, 39c1-3/Corn B/Site 1	15.97	1.08	4.2	62.67	0.79	0.23	0.14	1.04	9.04	0.2	0.32	2.98	0.23	0.56	0.54		0.155959	0.0308219	0.0395205	0.00883562	0.00931507	0.019726	0.0229452	0.0211644	0.100822	0.0634247	0.0039726	0.0519178	0.00944828	0.109384	0.0135616
2021-02-04			Spectrum 3	AM77-42a, 42b1-3, 42c1-3/Corn B/Site 1	16.2	1.02	4.19	62.57	0.79	0.24	0.18	1.06	8.99	0.26	0.31	2.94	0.19	0.47	0.58		0.0740411	0.0291781	0.0495205	0.0911644	0.00931507	0.00972603	0.0170548	0.00116438	0.0508219	0.00342466	0.0139726	0.0119178	0.0305517	0.0193836	0.0535616
			Spectrum 4	AM77-42a, 42b1-3, 42c1-3/Corn B/Site 1	16.06	1.04	4.23	62.78	0.79	0.24	0.18	1.09	9	0.23	0.33	2.94	0.14	0.43	0.52		0.0659589	0.00917808	0.00952055	0.118836	0.00931507	0.00972603	0.0170548	0.0288356	0.0608219	0.0334247	0.0060274	0.0119178	0.0805517	0.0206164	0.00643836
			Spectrum 85	AM77-42a, 42b1-3, 42c1-3/Corn B/Site 1	16.12	1.03	4.22	62.54	0.82	0.25	0.21	1.08	9.04	0.28	0.29	2.98	0.18	0.41	0.54		0.0059589	0.0191781	0.0195205	0.121164	0.0206849	0.000273973	0.0470548	0.0188356	0.100822	0.0165753	0.0339726	0.0519178	0.0405517	0.0406164	0.0135616
			Spectrum 86	AM77-42a, 42b1-3, 42c1-3/Corn B/Site 1	16.07	1.05	4.22	62.68	0.77	0.25	0.18	1.07	9.03	0.23	0.33	2.97	0.27	0.45	0.43		0.0559589	0.000821918	0.0195205	0.0188356	0.0293151	0.000273973	0.0170548	0.00883562	0.0908219	0.0334247	0.0060274	0.0419178	0.0494483	0.000616438	0.0964384
			Spectrum 87	AM77-42a, 42b1-3, 42c1-3/Corn B/Site 1	16.16	1.07	4.2	62.47	0.85	0.27	0.18	1.06	8.98	0.23	0.37	2.92	0.28	0.46	0.5		0.0340411	0.0208219	0.0395205	0.191164	0.0506849	0.020274	0.0170548	0.00116438	0.0408219	0.0334247	0.0460274	0.00808219	0.0594483	0.00938356	0.0264384
			Spectrum 88	AM77-42a, 42b1-3, 42c1-3/Corn B/Site 1	16.01	1.02	4.18	62.69	0.78	0.25	0.18	1.06	9	0.27	0.38	3.02	0.17	0.47	0.52		0.115959	0.0291781	0.0595205	0.0288356	0.0193151	0.000273973	0.0170548	0.00116438	0.0608219	0.00657534	0.0560274	0.0919178	0.0505517	0.0193836	0.00643836
2021-02-09			Spectrum 7	AM77-53b1-3, 53d, 60a1-6/Corn B/Site 1	16.01	1.03	4.25	62.67	0.76	0.22	0.19	1.07	8.98	0.25	0.32	2.88	0.22	0.57	0.58		0.115959	0.0191781	0.0104795	0.00883562	0.0393151	0.029726	0.0270548	0.00883562	0.0408219	0.0134247	0.0039726	0.0480822	0.000551724	0.119384	0.0535616
			Spectrum 8	AM77-53b1-3, 53d, 60a1-6/Corn B/Site 1	16.03	1.07	4.21	62.77	0.78	0.25	0.17	1.04	8.93	0.3	0.3	3	0.19	0.46	0.5		0.0959589	0.0208219	0.0295205	0.108836	0.0193151	0.000273973	0.00705479	0.0211644	0.00917808	0.0365753	0.0239726	0.0719178	0.0305517	0.00938356	0.0264384
			Spectrum 9	AM77-53b1-3, 53d, 60a1-6/Corn B/Site 1	16.2	1.04	4.17	62.66	0.88	0.25	0.17	1.04	8.98	0.24	0.31	2.88	0.19	0.56	0.42		0.0740411	0.00917808	0.0695205	0.00116438	0.0806849	0.000273973	0.00705479	0.0211644	0.0408219	0.0234247	0.0139726	0.0480822	0.0305517	0.109384	0.106438
			Spectrum 10	AM77-53b1-3, 53d, 60a1-6/Corn B/Site 1	16.07	1.03	4.29	62.56	0.79	0.24	0.16	1.07	8.93	0.27	0.31	2.98	0.26	0.47	0.58		0.0559589	0.0191781	0.0504795	0.101164	0.00931507	0.00972603	0.00294521	0.00883562	0.00917808	0.00657534	0.0139726	0.0519178	0.0394483	0.0193836	0.0535616
			Spectrum 11	AM77-53b1-3, 53d, 60a1-6/Corn B/Site 1	16.37	1.05	4.23	62.61	0.8	0.24	0.17	1.07	8.96	0.26	0.33	2.98		0.41	0.53		0.244041	0.000821918	0.00952055	0.0511644	0.000684932	0.00972603	0.00705479	0.00883562	0.0208219	0.00342466	0.0060274	0.0519178	0.220552	0.0406164	0.00356164
			Spectrum 111	AM77-53b1-3, 53d, 60a1-6/Corn B/Site 1	16.14	1.06	4.24	62.47	0.83	0.23	0.18	1.09	8.95	0.26	0.29	2.9	0.29	0.46	0.59		0.0140411	0.0108219	0.000479452	0.191164	0.0306849	0.019726	0.0170548	0.0288356	0.0108219	0.00342466	0.0339726	0.0280822	0.0694483	0.00938356	0.0635616
			Spectrum 112	AM77-53b1-3, 53d, 60a1-6/Corn B/Site 1	16	1.04	4.21	62.93	0.78	0.19	0.11	1.05	8.99	0.29	0.34	2.95	0.21	0.42	0.5		0.125959	0.00917808	0.0295205	0.268836	0.0193151	0.059726	0.0529452	0.0111644	0.0508219	0.0265753	0.0160274	0.0219178	0.0105517	0.0306164	0.0264384
			Spectrum 113	AM77-53b1-3, 53d, 60a1-6/Corn B/Site 1	16.13	1.07	4.22	62.68	0.81	0.25	0.17	1.07	8.97	0.27	0.31	2.98	0.16	0.42	0.5		0.0040411	0.0208219	0.0195205	0.0188356	0.0106849	0.000273973	0.00705479	0.00883562	0.0308219	0.00657534	0.0139726	0.0519178	0.0605517	0.0306164	0.0264384
			Spectrum 114	AM77-53b1-3, 53d, 60a1-6/Corn B/Site 1	16.01	1.04	4.21	62.82	0.77	0.21	0.12	1.04	9.01	0.25	0.33	2.93	0.24	0.51	0.51		0.115959	0.00917808	0.0295205	0.158836	0.0293151	0.039726	0.0429452	0.0211644	0.0708219	0.0134247	0.0060274	0.00191781	0.0194483	0.0593836	0.0164384
			Spectrum 115	AM77-53b1-3, 53d, 60a1-6/Corn B/Site 1	16.05	1.06	4.23	62.76	0.81	0.2	0.12	1.1	8.93	0.29	0.34	3.05	0.27	0.3	0.49		0.0759589	0.0108219	0.00952055	0.0988356	0.0106849	0.049726	0.0429452	0.0388356	0.00917808	0.0265753	0.0160274	0.121918	0.0494483	0.150616	0.0364384
2021-02-16			Spectrum 6	AM77-62a1-5, 62b1-6, 62c_NEW/Corn B/Site 1	16.22	1.07	4.3	62.53	0.88	0.21	0.16	1.04	8.84	0.22	0.3	2.89	0.29	0.49	0.54		0.0940411	0.0208219	0.0604795	0.131164	0.0806849	0.039726	0.00294521	0.0211644	0.0991781	0.0434247	0.0239726	0.0380822	0.0694483	0.0393836	0.0135616
			Spectrum 7	AM77-62a1-5, 62b1-6, 62c_NEW/Corn B/Site 1	16.07	1.06	4.27	62.68	0.78	0.24	0.17	1.05	8.86	0.31	0.31	2.97	0.21	0.55	0.47		0.0559589	0.0108219	0.0304795	0.0188356	0.0193151	0.00972603	0.00705479	0.0111644	0.0791781	0.0465753	0.0139726	0.0419178	0.0105517	0.0993836	0.0564384
			Spectrum 8	AM77-62a1-5, 62b1-6, 62c_NEW/Corn B/Site 1	16.11	1.08	4.22	62.67	0.74	0.25	0.17	1.05	8.91	0.32	0.33	2.92	0.17	0.48	0.56		0.0159589	0.0308219	0.0195205	0.00883562	0.0593151	0.000273973	0.00705479	0.0111644	0.0291781	0.0565753	0.0060274	0.00808219	0.0505517	0.0293836	0.0335616
			Spectrum 9	AM77-62a1-5, 62b1-6, 62c_NEW/Corn B/Site 1	16.19	1.08	4.3	62.59	0.81	0.24	0.18	1.07	8.88	0.27	0.31	2.88	0.24	0.35	0.61		0.0640411	0.0308219	0.0604795	0.0711644	0.0106849	0.00972603	0.0170548	0.00883562	0.0591781	0.00657534	0.0139726	0.0480822	0.0194483	0.100616	0.0835616
			Spectrum 10	AM77-62a1-5, 62b1-6, 62c_NEW/Corn B/Site 1	16.26	1.06	4.2	62.72	0.8	0.23	0.18	1.09	8.88	0.23	0.31	2.92	0.18	0.42	0.52		0.134041	0.0108219	0.0395205	0.0588356	0.000684932	0.019726	0.0170548	0.0288356	0.0591781	0.0334247	0.0139726	0.00808219	0.0405517	0.0306164	0.00643836
			Spectrum 129	AM77-62a1-5, 62b1-6, 62c_NEW/Corn B/Site 1	16.14	1.06	4.27	62.77	0.82	0.23	0.11	1.09	8.97	0.27	0.34	2.87	0.28	0.36	0.42		0.0140411	0.0108219	0.0304795	0.108836	0.0206849	0.019726	0.0529452	0.0288356	0.0308219	0.00657534	0.0160274	0.0580822	0.0594483	0.0906164	0.106438
			Spectrum 130	AM77-62a1-5, 62b1-6, 62c_NEW/Corn B/Site 1	16.27	1.07	4.22	62.62	0.72	0.24	0.15	1.05	8.98	0.26	0.32	2.89	0.16	0.43	0.62		0.144041	0.0208219	0.0195205	0.0411644	0.0793151	0.00972603	0.0129452	0.0111644	0.0408219	0.00342466	0.0039726	0.0380822	0.0605517	0.0206164	0.0935616
			Spectrum 131	AM77-62a1-5, 62b1-6, 62c_NEW/Corn B/Site 1	16.11	1.06	4.24	62.76	0.78	0.19	0.12	1.06	8.93	0.26	0.33	2.88	0.18	0.51	0.61		0.0159589	0.0108219	0.000479452	0.0988356	0.0193151	0.059726	0.0429452	0.00116438	0.00917808	0.00342466	0.0060274	0.0480822	0.0405517	0.0593836	0.0835616
			Spectrum 132	AM77-62a1-5, 62b1-6, 62c_NEW/Corn B/Site 1	16.12	1.05	4.2	62.86	0.72	0.21	0.11	1.06	9	0.24	0.32	2.87	0.28	0.45	0.49		0.0059589	0.000821918	0.0395205	0.198836	0.0793151	0.039726	0.0529452	0.00116438	0.0608219	0.0234247	0.0039726	0.0580822	0.0594483	0.000616438	0.0364384
			Spectrum 128	AM77-62a1-5, 62b1-6, 62c_NEW/Corn B/Site 1	16.18	1.04	4.18	62.71	0.81	0.23	0.16	1.04	8.92	0.28	0.34	2.98	0.24	0.37	0.53		0.0540411	0.00917808	0.0595205	0.0488356	0.0106849	0.019726	0.00294521	0.0211644	0.0191781	0.0165753	0.0160274	0.0519178	0.0194483	0.0806164	0.00356164
2021-02-18			Spectrum 6	AM78-109, 205, 604a-b, 605, 608, 609a-b/Corn B/Site 1	16.26	1.06	4.23	62.68	0.81	0.22	0.17	1.07	8.84	0.27	0.32	2.9	0.23	0.51	0.43		0.134041	0.0108219	0.00952055	0.0188356	0.0106849	0.029726	0.00705479	0.00883562	0.0991781	0.00657534	0.0039726	0.0280822	0.00944828	0.0593836	0.0964384
			Spectrum 7	AM78-109, 205, 604a-b, 605, 608, 609a-b/Corn B/Site 1	16.3	1.09	4.23	62.61	0.79	0.26	0.16	1.07	8.83	0.26	0.29	2.93	0.21	0.5	0.49		0.174041	0.0408219	0.00952055	0.0511644	0.00931507	0.010274	0.00294521	0.00883562	0.109178	0.00342466	0.0339726	0.00191781	0.0105517	0.0493836	0.0364384
			Spectrum 8	AM78-109, 205, 604a-b, 605, 608, 609a-b/Corn B/Site 1	16.26	1.03	4.23	62.59	0.79	0.24	0.15	1.06	8.85	0.26	0.33	2.9	0.25	0.46	0.58		0.134041	0.0191781	0.00952055	0.0711644	0.00931507	0.00972603	0.0129452	0.00116438	0.0891781	0.00342466	0.0060274	0.0280822	0.0294483	0.00938356	0.0535616
			Spectrum 9	AM78-109, 205, 604a-b, 605, 608, 609a-b/Corn B/Site 1	16.22	1.06	4.29	62.53	0.8	0.24	0.18	1.08	8.85	0.26	0.35	2.91	0.2	0.52	0.51		0.0940411	0.0108219	0.0504795	0.131164	0.000684932	0.00972603	0.0170548	0.0188356	0.0891781	0.00342466	0.0260274	0.0180822	0.0205517	0.0693836	0.0164384
			Spectrum 10	AM78-109, 205, 604a-b, 605, 608, 609a-b/Corn B/Site 1	16.36	1.05	4.24	62.56	0.83	0.24	0.16	1.03	8.89	0.26	0.32	2.9	0.21	0.43	0.51		0.234041	0.000821918	0.000479452	0.101164	0.0306849	0.00972603	0.00294521	0.0311644	0.0491781	0.00342466	0.0039726	0.0280822	0.0105517	0.0206164	0.0164384
			Spectrum 73	AM78-109, 205, 604a-b, 605, 608, 609a-b/Corn B/Site 1	16.35	1.04	4.27	62.6	0.79	0.23	0.17	1.03	8.8	0.22	0.3	2.89	0.29	0.46	0.54		0.224041	0.00917808	0.0304795	0.0611644	0.00931507	0.019726	0.00705479	0.0311644	0.139178	0.0434247	0.0239726	0.0380822	0.0694483	0.00938356	0.0135616
			Spectrum 74	AM78-109, 205, 604a-b, 605, 608, 609a-b/Corn B/Site 1	16.19	1.07	4.34	62.45	0.74	0.24	0.19	1.05	8.85	0.29	0.34	2.87	0.29	0.44	0.63		0.0640411	0.0208219	0.100479	0.211164	0.0593151	0.00972603	0.0270548	0.0111644	0.0891781	0.0265753	0.0160274	0.0580822	0.0694483	0.0106164	0.103562
			Spectrum 75	AM78-109, 205, 604a-b, 605, 608, 609a-b/Corn B/Site 1	16.24	1.03	4.29	62.66	0.78	0.26	0.18	1.05	8.86	0.26	0.31	2.88	0.2	0.47	0.54		0.114041	0.0191781	0.0504795	0.00116438	0.0193151	0.010274	0.0170548	0.0111644	0.0791781	0.00342466	0.0139726	0.0480822	0.0205517	0.0193836	0.0135616
			Spectrum 76	AM78-109, 205, 604a-b, 605, 608, 609a-b/Corn B/Site 1	16.3	1.09	4.26	62.51	0.84	0.24	0.2	1.06	8.88	0.3	0.28	2.9	0.23	0.45	0.47		0.174041	0.0408219	0.0204795	0.151164	0.0406849	0.00972603	0.0370548	0.00116438	0.0591781	0.0365753	0.0439726	0.0280822	0.00944828	0.000616438	0.0564384
			Spectrum 77	AM78-109, 205, 604a-b, 605, 608, 609a-b/Corn B/Site 1	16.37	1.04	4.19	62.73	0.77	0.23	0.16	1.01	8.86	0.29	0.34	2.9	0.2	0.46	0.44		0.244041	0.00917808	0.0495205	0.0688356	0.0293151	0.019726	0.00294521	0.0511644	0.0791781	0.0265753	0.0160274	0.0280822	0.0205517	0.00938356	0.0864384
2021-02-23			Spectrum 6	AM79-23a-b, 534a-d, 539, 540a-c, 541, 544a-b/Corn B/Site 1	16.17	1.03	4.31	62.67	0.85	0.24	0.15	1.04	9.01	0.29	0.35	2.77	0.21	0.57	0.35		0.0440411	0.0191781	0.0704795	0.00883562	0.0506849	0.00972603	0.0129452	0.0211644	0.0708219	0.0265753	0.0260274	0.158082	0.0105517	0.119384	0.176438
			Spectrum 7	AM79-23a-b, 534a-d, 539, 540a-c, 541, 544a-b/Corn B/Site 1	16.17	1.11	4.28	62.6	0.75	0.23	0.2	1.08	8.77	0.27	0.29	2.89	0.27	0.46	0.65		0.0440411	0.0608219	0.0404795	0.0611644	0.0493151	0.019726	0.0370548	0.0188356	0.169178	0.00657534	0.0339726	0.0380822	0.0494483	0.00938356	0.123562
			Spectrum 8	AM79-23a-b, 534a-d, 539, 540a-c, 541, 544a-b/Corn B/Site 1	16.17	1.01	4.31	62.62	0.86	0.23	0.17	1.03	8.89	0.25	0.38	2.89	0.22	0.56	0.4		0.0440411	0.0391781	0.0704795	0.0411644	0.0606849	0.019726	0.00705479	0.0311644	0.0491781	0.0134247	0.0560274	0.0380822	0.000551724	0.109384	0.126438
			Spectrum 9	AM79-23a-b, 534a-d, 539, 540a-c, 541, 544a-b/Corn B/Site 1	16.23	1.07	4.27	62.52	0.79	0.25	0.16	1	8.89	0.24	0.36	2.92	0.34	0.42	0.53		0.104041	0.0208219	0.0304795	0.141164	0.00931507	0.000273973	0.00294521	0.0611644	0.0491781	0.0234247	0.0360274	0.00808219	0.119448	0.0306164	0.00356164
			Spectrum 10	AM79-23a-b, 534a-d, 539, 540a-c, 541, 544a-b/Corn B/Site 1	16.32	1.02	4.19	62.73	0.83	0.22	0.16	1.08	8.79	0.23	0.3	2.91	0.23	0.33	0.65		0.194041	0.0291781	0.0495205	0.0688356	0.0306849	0.029726	0.00294521	0.0188356	0.149178	0.0334247	0.0239726	0.0180822	0.00944828	0.120616	0.123562
			Spectrum 101	AM79-23a-b, 534a-d, 539, 540a-c, 541, 544a-b/Corn B/Site 1	16.26	1.07	4.24	62.67	0.76	0.23	0.16	1.08	8.86	0.24	0.28	2.93	0.21	0.52	0.5		0.134041	0.0208219	0.000479452	0.00883562	0.0393151	0.019726	0.00294521	0.0188356	0.0791781	0.0234247	0.0439726	0.00191781	0.0105517	0.0693836	0.0264384
			Spectrum 102	AM79-23a-b, 534a-d, 539, 540a-c, 541, 544a-b/Corn B/Site 1	16.24	1.04	4.2	62.64	0.75	0.24	0.17	1.07	8.91	0.29	0.35	2.93	0.19	0.48	0.51		0.114041	0.00917808	0.0395205	0.0211644	0.0493151	0.00972603	0.00705479	0.00883562	0.0291781	0.0265753	0.0260274	0.00191781	0.0305517	0.0293836	0.0164384
			Spectrum 103	AM79-23a-b, 534a-d, 539, 540a-c, 541, 544a-b/Corn B/Site 1	16.21	1.03	4.25	62.78	0.77	0.21	0.16	1.04	8.94	0.22	0.35	2.91	0.16	0.42	0.55		0.0840411	0.0191781	0.0104795	0.118836	0.0293151	0.039726	0.00294521	0.0211644	0.000821918	0.0434247	0.0260274	0.0180822	0.0605517	0.0306164	0.0235616
			Spectrum 104	AM79-23a-b, 534a-d, 539, 540a-c, 541, 544a-b/Corn B/Site 1	16.35	1.05	4.2	62.68	0.79	0.24	0.14	1.06	8.96	0.25	0.3	2.91	0.13	0.37	0.56		0.224041	0.000821918	0.0395205	0.0188356	0.00931507	0.00972603	0.0229452	0.00116438	0.0208219	0.0134247	0.0239726	0.0180822	0.0905517	0.0806164	0.0335616
			Spectrum 105	AM79-23a-b, 534a-d, 539, 540a-c, 541, 544a-b/Corn B/Site 1	16.12	1.05	4.21	62.78	0.8	0.21	0.11	1.05	8.94	0.29	0.3	2.89	0.23	0.4	0.62		0.0059589	0.000821918	0.0295205	0.118836	0.000684932	0.039726	0.0529452	0.0111644	0.000821918	0.0265753	0.0239726	0.0380822	0.00944828	0.0506164	0.0935616
2021-02-25			Spectrum 6	AM79-545, 547, 547b, 552, 553, 555/Corn B/Site 1	16.16	1.06	4.22	62.66	0.79	0.25	0.18	1.06	8.93	0.24	0.34	2.91	0.24	0.41	0.55		0.0340411	0.0108219	0.0195205	0.00116438	0.00931507	0.000273973	0.0170548	0.00116438	0.00917808	0.0234247	0.0160274	0.0180822	0.0194483	0.0406164	0.0235616
			Spectrum 7	AM79-545, 547, 547b, 552, 553, 555/Corn B/Site 1	16.23	1.05	4.2	62.74	0.79	0.23	0.16	1.09	8.93	0.26	0.3	2.92	0.19	0.37	0.54		0.104041	0.000821918	0.0395205	0.0788356	0.00931507	0.019726	0.00294521	0.0288356	0.00917808	0.00342466	0.0239726	0.00808219	0.0305517	0.0806164	0.0135616
			Spectrum 8	AM79-545, 547, 547b, 552, 553, 555/Corn B/Site 1	16.16	1.02	4.21	62.8	0.81	0.23	0.16	1.07	8.96	0.24	0.31	2.93	0.2	0.42	0.49		0.0340411	0.0291781	0.0295205	0.138836	0.0106849	0.019726	0.00294521	0.00883562	0.0208219	0.0234247	0.0139726	0.00191781	0.0205517	0.0306164	0.0364384
			Spectrum 9	AM79-545, 547, 547b, 552, 553, 555/Corn B/Site 1	16.14	1.06	4.25	62.66	0.85	0.24	0.19	1.05	8.92	0.29	0.31	2.91	0.23	0.44	0.46		0.0140411	0.0108219	0.0104795	0.00116438	0.0506849	0.00972603	0.0270548	0.0111644	0.0191781	0.0265753	0.0139726	0.0180822	0.00944828	0.0106164	0.0664384
			Spectrum 10	AM79-545, 547, 547b, 552, 553, 555/Corn B/Site 1	16.14	1	4.27	62.49	0.77	0.25	0.17	1.05	8.95	0.28	0.37	2.92	0.27	0.56	0.52		0.0140411	0.0491781	0.0304795	0.171164	0.0293151	0.000273973	0.00705479	0.0111644	0.0108219	0.0165753	0.0460274	0.00808219	0.0494483	0.109384	0.00643836
			Spectrum 69	AM81-82_576a-c, 586a, 587a-c, 591a, 593a-b, 95a-b, 114, 119/Corn B/Site 1	16.08	1.03	4.2	62.63	0.85	0.25	0.19	1.08	8.98	0.32	0.31	2.88	0.25	0.36	0.57		0.0459589	0.0191781	0.0395205	0.0311644	0.0506849	0.000273973	0.0270548	0.0188356	0.0408219	0.0565753	0.0139726	0.0480822	0.0294483	0.0906164	0.0435616
			Spectrum 70	AM81-82_576a-c, 586a, 587a-c, 591a, 593a-b, 95a-b, 114, 119/Corn B/Site 1	16.03	1.02	4.22	62.5	0.79	0.25	0.17	1.07	8.97	0.28	0.35	2.94	0.31	0.54	0.55		0.0959589	0.0291781	0.0195205	0.161164	0.00931507	0.000273973	0.00705479	0.00883562	0.0308219	0.0165753	0.0260274	0.0119178	0.0894483	0.0893836	0.0235616
			Spectrum 71	AM81-82_576a-c, 586a, 587a-c, 591a, 593a-b, 95a-b, 114, 119/Corn B/Site 1	15.92	0.99	4.25	62.74	0.84	0.22	0.12	1.06	9.05	0.28	0.34	2.96	0.26	0.34	0.62		0.205959	0.0591781	0.0104795	0.0788356	0.0406849	0.029726	0.0429452	0.00116438	0.110822	0.0165753	0.0160274	0.0319178	0.0394483	0.110616	0.0935616
			Spectrum 72	AM81-82_576a-c, 586a, 587a-c, 591a, 593a-b, 95a-b, 114, 119/Corn B/Site 1	15.98	1.06	4.23	62.72	0.82	0.22	0.18	1.07	8.93	0.29	0.33	3.01	0.24	0.39	0.54		0.145959	0.0108219	0.00952055	0.0588356	0.0206849	0.029726	0.0170548	0.00883562	0.00917808	0.0265753	0.0060274	0.0819178	0.0194483	0.0606164	0.0135616
			Spectrum 73	AM81-82_576a-c, 586a, 587a-c, 591a, 593a-b, 95a-b, 114, 119/Corn B/Site 1	15.87	1.03	4.23	62.78	0.85	0.19	0.11	1.07	9.11	0.24	0.36	2.9	0.23	0.47	0.55		0.255959	0.0191781	0.00952055	0.118836	0.0506849	0.059726	0.0529452	0.00883562	0.170822	0.0234247	0.0360274	0.0280822	0.00944828	0.0193836	0.0235616
2021-03-02			Spectrum 7	AM83-2i1-2, 2th, 16a-c, 34a-b, 39, 45, 47, 56a-c/Corn B/Site 1	16.18	1.07	4.19	63	0.8	0.26	0.18	1.09	8.88	0.2	0.28	2.85	0.15	0.38	0.48		0.0540411	0.0208219	0.0495205	0.338836	0.000684932	0.010274	0.0170548	0.0288356	0.0591781	0.0634247	0.0439726	0.0780822	0.0705517	0.0706164	0.0464384
			Spectrum 8	AM83-2i1-2, 2th, 16a-c, 34a-b, 39, 45, 47, 56a-c/Corn B/Site 1	16.1	1.06	4.25	62.72	0.89	0.24	0.17	1.09	8.79	0.28	0.37	2.85	0.2	0.46	0.51		0.0259589	0.0108219	0.0104795	0.0588356	0.0906849	0.00972603	0.00705479	0.0288356	0.149178	0.0165753	0.0460274	0.0780822	0.0205517	0.00938356	0.0164384
			Spectrum 9	AM83-2i1-2, 2th, 16a-c, 34a-b, 39, 45, 47, 56a-c/Corn B/Site 1	16.1	1.08	4.14	62.86	0.91	0.2	0.17	1.14	8.89	0.29	0.37	2.94	0.14	0.21	0.55		0.0259589	0.0308219	0.0995205	0.198836	0.110685	0.049726	0.00705479	0.0788356	0.0491781	0.0265753	0.0460274	0.0119178	0.0805517	0.240616	0.0235616
			Spectrum 10	AM83-2i1-2, 2th, 16a-c, 34a-b, 39, 45, 47, 56a-c/Corn B/Site 1	16.08	1.06	4.32	62.55	0.9	0.22	0.19	1.01	8.89	0.22	0.32	2.86	0.3	0.54	0.54		0.0459589	0.0108219	0.0804795	0.111164	0.100685	0.029726	0.0270548	0.0511644	0.0491781	0.0434247	0.0039726	0.0680822	0.0794483	0.0893836	0.0135616
			Spectrum 11	AM83-2i1-2, 2th, 16a-c, 34a-b, 39, 45, 47, 56a-c/Corn B/Site 1	16.12	1.13	4.25	62.45	0.86	0.21	0.15	1.09	8.92	0.31	0.29	2.97	0.19	0.5	0.56		0.0059589	0.0808219	0.0104795	0.211164	0.0606849	0.039726	0.0129452	0.0288356	0.0191781	0.0465753	0.0339726	0.0419178	0.0305517	0.0493836	0.0335616
			Spectrum 107	AM83-2i1-2, 2th, 16a-c, 34a-b, 39, 45, 47, 56a-c/Corn B/Site 1	16.1	1.08	4.27	62.54	0.83	0.22	0.19	1.07	8.91	0.29	0.32	3.04	0.24	0.4	0.51		0.0259589	0.0308219	0.0304795	0.121164	0.0306849	0.029726	0.0270548	0.00883562	0.0291781	0.0265753	0.0039726	0.111918	0.0194483	0.0506164	0.0164384
			Spectrum 108	AM83-2i1-2, 2th, 16a-c, 34a-b, 39, 45, 47, 56a-c/Corn B/Site 1	16.08	1.01	4.23	62.73	0.83	0.24	0.18	1.05	9.02	0.22	0.34	2.9	0.17	0.55	0.46		0.0459589	0.0391781	0.00952055	0.0688356	0.0306849	0.00972603	0.0170548	0.0111644	0.0808219	0.0434247	0.0160274	0.0280822	0.0505517	0.0993836	0.0664384
			Spectrum 109	AM83-2i1-2, 2th, 16a-c, 34a-b, 39, 45, 47, 56a-c/Corn B/Site 1	16.13	1.06	4.21	62.6	0.83	0.23	0.18	1.08	8.94	0.29	0.32	2.9	0.28	0.39	0.57		0.0040411	0.0108219	0.0295205	0.0611644	0.0306849	0.019726	0.0170548	0.0188356	0.000821918	0.0265753	0.0039726	0.0280822	0.0594483	0.0606164	0.0435616
			Spectrum 110	AM83-2i1-2, 2th, 16a-c, 34a-b, 39, 45, 47, 56a-c/Corn B/Site 1	15.99	1.04	4.25	62.75	0.78	0.23	0.18	1.08	8.95	0.26	0.36	2.91	0.2	0.42	0.61		0.135959	0.00917808	0.0104795	0.0888356	0.0193151	0.019726	0.0170548	0.0188356	0.0108219	0.00342466	0.0360274	0.0180822	0.0205517	0.0306164	0.0835616
			Spectrum 111	AM83-2i1-2, 2th, 16a-c, 34a-b, 39, 45, 47, 56a-c/Corn B/Site 1	16.1	1.09	4.17	62.64	0.8	0.24	0.17	1.05	8.97	0.3	0.3	2.93	0.26	0.52	0.47		0.0259589	0.0408219	0.0695205	0.0211644	0.000684932	0.00972603	0.00705479	0.0111644	0.0308219	0.0365753	0.0239726	0.00191781	0.0394483	0.0693836	0.0564384
2021-03-09				AM84-4a1-3, 4b1-3, 4c, 4d, 4e1-3, 4f1-5/Corn B/Site 1	16.19	1.07	4.28	62.6	0.78	0.22	0.18	1.06	8.86	0.25	0.32	2.9	0.23	0.42	0.62		0.0640411	0.0208219	0.0404795	0.0611644	0.0193151	0.029726	0.0170548	0.00116438	0.0791781	0.0134247	0.0039726	0.0280822	0.00944828	0.0306164	0.0935616
				AM84-4a1-3, 4b1-3, 4c, 4d, 4e1-3, 4f1-5/Corn B/Site 1	16.33	1.02	4.24	62.68	0.81	0.25	0.17	1.09	8.8	0.21	0.27	2.91	0.21	0.46	0.54		0.204041	0.0291781	0.000479452	0.0188356	0.0106849	0.000273973	0.00705479	0.0288356	0.139178	0.0534247	0.0539726	0.0180822	0.0105517	0.00938356	0.0135616
				AM84-4a1-3, 4b1-3, 4c, 4d, 4e1-3, 4f1-5/Corn B/Site 1	16.21	1.04	4.22	62.53	0.83	0.23	0.17	1.05	8.95	0.24	0.28	2.96	0.23	0.48	0.59		0.0840411	0.00917808	0.0195205	0.131164	0.0306849	0.019726	0.00705479	0.0111644	0.0108219	0.0234247	0.0439726	0.0319178	0.00944828	0.0293836	0.0635616
				AM84-4a1-3, 4b1-3, 4c, 4d, 4e1-3, 4f1-5/Corn B/Site 1	16.18	1.06	4.21	62.8	0.73	0.25	0.17	1.07	8.84	0.28	0.3	2.96	0.18	0.46	0.49		0.0540411	0.0108219	0.0295205	0.138836	0.0693151	0.000273973	0.00705479	0.00883562	0.0991781	0.0165753	0.0239726	0.0319178	0.0405517	0.00938356	0.0364384
				AM84-4a1-3, 4b1-3, 4c, 4d, 4e1-3, 4f1-5/Corn B/Site 1	16.17	1.07	4.27	62.68	0.86	0.24	0.18	1.07	8.88	0.31	0.34	2.85	0.19	0.35	0.55		0.0440411	0.0208219	0.0304795	0.0188356	0.0606849	0.00972603	0.0170548	0.00883562	0.0591781	0.0465753	0.0160274	0.0780822	0.0305517	0.100616	0.0235616
				AM84-4a1-3, 4b1-3, 4c, 4d, 4e1-3, 4f1-5/Corn B/Site 1	16.13	1.05	4.29	62.62	0.86	0.25	0.15	1.06	8.88	0.27	0.35	2.93	0.18	0.46	0.52		0.0040411	0.000821918	0.0504795	0.0411644	0.0606849	0.000273973	0.0129452	0.00116438	0.0591781	0.00657534	0.0260274	0.00191781	0.0405517	0.00938356	0.00643836
				AM84-4a1-3, 4b1-3, 4c, 4d, 4e1-3, 4f1-5/Corn B/Site 1	16.28	1.05	4.27	62.58	0.81	0.22	0.16	1.07	8.91	0.22	0.34	2.94	0.17	0.42	0.55		0.154041	0.000821918	0.0304795	0.0811644	0.0106849	0.029726	0.00294521	0.00883562	0.0291781	0.0434247	0.0160274	0.0119178	0.0505517	0.0306164	0.0235616
				AM84-4a1-3, 4b1-3, 4c, 4d, 4e1-3, 4f1-5/Corn B/Site 1	16.1	1.1	4.26	62.85	0.78	0.23	0.13	1.05	8.98	0.26	0.32	2.86	0.18	0.37	0.53		0.0259589	0.0508219	0.0204795	0.188836	0.0193151	0.019726	0.0329452	0.0111644	0.0408219	0.00342466	0.0039726	0.0680822	0.0405517	0.0806164	0.00356164
				AM84-4a1-3, 4b1-3, 4c, 4d, 4e1-3, 4f1-5/Corn B/Site 1	16.16	1.04	4.27	62.72	0.8	0.24	0.17	1.04	8.86	0.25	0.31	3.02	0.19	0.48	0.46		0.0340411	0.00917808	0.0304795	0.0588356	0.000684932	0.00972603	0.00705479	0.0211644	0.0791781	0.0134247	0.0139726	0.0919178	0.0305517	0.0293836	0.0664384
				AM84-4a1-3, 4b1-3, 4c, 4d, 4e1-3, 4f1-5/Corn B/Site 1	16.2	1.04	4.23	62.74	0.8	0.22	0.14	1.06	8.98	0.28	0.29	2.92	0.19	0.38	0.53		0.0740411	0.00917808	0.00952055	0.0788356	0.000684932	0.029726	0.0229452	0.00116438	0.0408219	0.0165753	0.0339726	0.00808219	0.0305517	0.0706164	0.00356164
2021-03-18				AM84-31a-b, 55a-e, 66a-c/Corn B/Site 1	16.06	1.02	4.24	62.68	0.83	0.23	0.17	1.05	8.94	0.24	0.28	2.89	0.22	0.63	0.51		0.0659589	0.0291781	0.000479452	0.0188356	0.0306849	0.019726	0.00705479	0.0111644	0.000821918	0.0234247	0.0439726	0.0380822	0.000551724	0.179384	0.0164384
				AM84-31a-b, 55a-e, 66a-c/Corn B/Site 1	16.09	1.11	4.18	62.6	0.81	0.23	0.18	1.06	8.94	0.19	0.35	2.96	0.22	0.5	0.58		0.0359589	0.0608219	0.0595205	0.0611644	0.0106849	0.019726	0.0170548	0.00116438	0.000821918	0.0734247	0.0260274	0.0319178	0.000551724	0.0493836	0.0535616
				AM84-31a-b, 55a-e, 66a-c/Corn B/Site 1	16.14	1.1	4.29	62.57	0.8	0.23	0.17	1.06	8.85	0.25	0.29	2.96	0.28	0.46	0.53		0.0140411	0.0508219	0.0504795	0.0911644	0.000684932	0.019726	0.00705479	0.00116438	0.0891781	0.0134247	0.0339726	0.0319178	0.0594483	0.00938356	0.00356164
				AM84-31a-b, 55a-e, 66a-c/Corn B/Site 1	15.99	1.08	4.26	62.46	0.79	0.24	0.16	1.09	9	0.25	0.34	2.93	0.25	0.55	0.61		0.135959	0.0308219	0.0204795	0.201164	0.00931507	0.00972603	0.00294521	0.0288356	0.0608219	0.0134247	0.0160274	0.00191781	0.0294483	0.0993836	0.0835616
				AM84-31a-b, 55a-e, 66a-c/Corn B/Site 1	16.2	1.03	4.22	62.59	0.82	0.23	0.17	1.05	8.88	0.27	0.34	2.96	0.23	0.43	0.58		0.0740411	0.0191781	0.0195205	0.0711644	0.0206849	0.019726	0.00705479	0.0111644	0.0591781	0.00657534	0.0160274	0.0319178	0.00944828	0.0206164	0.0535616
				AM84-31a-b, 55a-e, 66a-c/Corn B/Site 1	16.06	1.06	4.32	62.68	0.87	0.22	0.12	1.07	9.08	0.24	0.3	2.91	0.19	0.4	0.48		0.0659589	0.0108219	0.0804795	0.0188356	0.0706849	0.029726	0.0429452	0.00883562	0.140822	0.0234247	0.0239726	0.0180822	0.0305517	0.0506164	0.0464384
				AM84-31a-b, 55a-e, 66a-c/Corn B/Site 1	15.99	1.03	4.28	62.68	0.78	0.21	0.1	1.04	8.95	0.32	0.35	3.02	0.25	0.46	0.54		0.135959	0.0191781	0.0404795	0.0188356	0.0193151	0.039726	0.0629452	0.0211644	0.0108219	0.0565753	0.0260274	0.0919178	0.0294483	0.00938356	0.0135616
				AM84-31a-b, 55a-e, 66a-c/Corn B/Site 1	15.92	1.06	4.23	62.77	0.84	0.23	0.13	1.04	9.11	0.23	0.36	2.88	0.19	0.47	0.52		0.205959	0.0108219	0.00952055	0.108836	0.0406849	0.019726	0.0329452	0.0211644	0.170822	0.0334247	0.0360274	0.0480822	0.0305517	0.0193836	0.00643836
				AM84-31a-b, 55a-e, 66a-c/Corn B/Site 1	16.01	1.04	4.29	62.85	0.76	0.19	0.13	1.08	8.87	0.26	0.32	3.02	0.26	0.34	0.59		0.115959	0.00917808	0.0504795	0.188836	0.0393151	0.059726	0.0329452	0.0188356	0.0691781	0.00342466	0.0039726	0.0919178	0.0394483	0.110616	0.0635616
				AM84-31a-b, 55a-e, 66a-c/Corn B/Site 1	16.05	1.03	4.28	62.78	0.83	0.23	0.11	1.07	9.05	0.23	0.3	2.95	0.24	0.35	0.5		0.0759589	0.0191781	0.0404795	0.118836	0.0306849	0.019726	0.0529452	0.00883562	0.110822	0.0334247	0.0239726	0.0219178	0.0194483	0.100616	0.0264384
2021-03-23			Spectrum 7	AM85-124c1-2, 125.1-3, 125a1-3/Corn B/Site 1	16.2	1.09	4.2	62.76	0.78	0.23	0.16	1.08	8.87	0.25	0.31	2.92	0.17	0.44	0.55		0.0740411	0.0408219	0.0395205	0.0988356	0.0193151	0.019726	0.00294521	0.0188356	0.0691781	0.0134247	0.0139726	0.00808219	0.0505517	0.0106164	0.0235616
			Spectrum 8	AM85-124c1-2, 125.1-3, 125a1-3/Corn B/Site 1	16.14	1.05	4.19	62.71	0.8	0.22	0.18	1.07	8.94	0.24	0.33	2.93	0.18	0.51	0.52		0.0140411	0.000821918	0.0495205	0.0488356	0.000684932	0.029726	0.0170548	0.00883562	0.000821918	0.0234247	0.0060274	0.00191781	0.0405517	0.0593836	0.00643836
			Spectrum 9	AM85-124c1-2, 125.1-3, 125a1-3/Corn B/Site 1	16.11	1.07	4.2	62.7	0.89	0.24	0.18	1.04	8.92	0.26	0.35	2.86	0.18	0.5	0.5		0.0159589	0.0208219	0.0395205	0.0388356	0.0906849	0.00972603	0.0170548	0.0211644	0.0191781	0.00342466	0.0260274	0.0680822	0.0405517	0.0493836	0.0264384
			Spectrum 10	AM85-124c1-2, 125.1-3, 125a1-3/Corn B/Site 1	16.12	1.04	4.24	62.62	0.82	0.25	0.18	1.07	8.9	0.28	0.33	2.95	0.16	0.53	0.52		0.0059589	0.00917808	0.000479452	0.0411644	0.0206849	0.000273973	0.0170548	0.00883562	0.0391781	0.0165753	0.0060274	0.0219178	0.0605517	0.0793836	0.00643836
			Spectrum 11	AM85-124c1-2, 125.1-3, 125a1-3/Corn B/Site 1	16.16	1	4.21	62.85	0.72	0.25	0.16	1.05	9.01	0.27	0.35	2.85	0.28	0.38	0.46		0.0340411	0.0491781	0.0295205	0.188836	0.0793151	0.000273973	0.00294521	0.0111644	0.0708219	0.00657534	0.0260274	0.0780822	0.0594483	0.0706164	0.0664384
			Spectrum 71	AM85-124c1-2, 125.1-3, 125a1-3/Corn B/Site 1	16.23	1.01	4.25	62.84	0.79	0.24	0.17	1.07	8.86	0.24	0.31	2.87	0.21	0.46	0.44		0.104041	0.0391781	0.0104795	0.178836	0.00931507	0.00972603	0.00705479	0.00883562	0.0791781	0.0234247	0.0139726	0.0580822	0.0105517	0.00938356	0.0864384
			Spectrum 72	AM85-124c1-2, 125.1-3, 125a1-3/Corn B/Site 1	16.1	1.04	4.25	62.8	0.76	0.25	0.17	1.04	8.99	0.26	0.3	2.9	0.25	0.39	0.5		0.0259589	0.00917808	0.0104795	0.138836	0.0393151	0.000273973	0.00705479	0.0211644	0.0508219	0.00342466	0.0239726	0.0280822	0.0294483	0.0606164	0.0264384
			Spectrum 73	AM85-124c1-2, 125.1-3, 125a1-3/Corn B/Site 1	16.24	1.05	4.21	62.64	0.77	0.23	0.17	1.06	8.95	0.25	0.36	2.98	0.15	0.4	0.53		0.114041	0.000821918	0.0295205	0.0211644	0.0293151	0.019726	0.00705479	0.00116438	0.0108219	0.0134247	0.0360274	0.0519178	0.0705517	0.0506164	0.00356164
			Spectrum 74	AM85-124c1-2, 125.1-3, 125a1-3/Corn B/Site 1	16.11	1.03	4.27	62.71	0.8	0.23	0.18	1.05	8.95	0.23	0.3	2.91	0.18	0.5	0.56		0.0159589	0.0191781	0.0304795	0.0488356	0.000684932	0.019726	0.0170548	0.0111644	0.0108219	0.0334247	0.0239726	0.0180822	0.0405517	0.0493836	0.0335616
			Spectrum 75	AM85-124c1-2, 125.1-3, 125a1-3/Corn B/Site 1	16.02	1.03	4.29	62.65	0.81	0.24	0.16	1.07	8.97	0.29	0.32	2.91	0.25	0.49	0.5		0.105959	0.0191781	0.0504795	0.0111644	0.0106849	0.00972603	0.00294521	0.00883562	0.0308219	0.0265753	0.0039726	0.0180822	0.0294483	0.0393836	0.0264384
2021-03-30			Spectrum 6	AM85-126-133-134.1-3, 135, 149.1-5, 178/Corn B/Site 1	16.14	1.05	4.27	62.6	0.81	0.25	0.17	1.05	8.95	0.22	0.31	2.98	0.29	0.43	0.47		0.0140411	0.000821918	0.0304795	0.0611644	0.0106849	0.000273973	0.00705479	0.0111644	0.0108219	0.0434247	0.0139726	0.0519178	0.0694483	0.0206164	0.0564384
			Spectrum 7	AM85-126-133-134.1-3, 135, 149.1-5, 178/Corn B/Site 1	16.12	1.05	4.25	62.67	0.81	0.24	0.18	1.05	8.91	0.28	0.38	2.92	0.25	0.39	0.51		0.0059589	0.000821918	0.0104795	0.00883562	0.0106849	0.00972603	0.0170548	0.0111644	0.0291781	0.0165753	0.0560274	0.00808219	0.0294483	0.0606164	0.0164384
			Spectrum 8	AM85-126-133-134.1-3, 135, 149.1-5, 178/Corn B/Site 1	16.22	0.99	4.25	62.6	0.78	0.26	0.17	1.05	8.98	0.26	0.34	3	0.21	0.38	0.51		0.0940411	0.0591781	0.0104795	0.0611644	0.0193151	0.010274	0.00705479	0.0111644	0.0408219	0.00342466	0.0160274	0.0719178	0.0105517	0.0706164	0.0164384
			Spectrum 9	AM85-126-133-134.1-3, 135, 149.1-5, 178/Corn B/Site 1	16.18	1.05	4.28	62.7	0.76	0.24	0.16	1.05	8.94	0.31	0.3	2.85	0.18	0.45	0.55		0.0540411	0.000821918	0.0404795	0.0388356	0.0393151	0.00972603	0.00294521	0.0111644	0.000821918	0.0465753	0.0239726	0.0780822	0.0405517	0.000616438	0.0235616
			Spectrum 10	AM85-126-133-134.1-3, 135, 149.1-5, 178/Corn B/Site 1	16.2	1.02	4.23	62.69	0.82	0.22	0.16	1.05	8.92	0.32	0.35	2.86	0.2	0.39	0.57		0.0740411	0.0291781	0.00952055	0.0288356	0.0206849	0.029726	0.00294521	0.0111644	0.0191781	0.0565753	0.0260274	0.0680822	0.0205517	0.0606164	0.0435616
			Spectrum 81	AM85-126-133-134.1-3, 135, 149.1-5, 178/Corn B/Site 1	16.09	1.04	4.27	62.65	0.78	0.23	0.15	1.07	8.96	0.3	0.32	2.93	0.21	0.47	0.54		0.0359589	0.00917808	0.0304795	0.0111644	0.0193151	0.019726	0.0129452	0.00883562	0.0208219	0.0365753	0.0039726	0.00191781	0.0105517	0.0193836	0.0135616
			Spectrum 82	AM85-126-133-134.1-3, 135, 149.1-5, 178/Corn B/Site 1	16.11	1.05	4.32	62.74	0.75	0.21	0.11	1.04	8.98	0.28	0.27	2.95	0.31	0.39	0.51		0.0159589	0.000821918	0.0804795	0.0788356	0.0493151	0.039726	0.0529452	0.0211644	0.0408219	0.0165753	0.0539726	0.0219178	0.0894483	0.0606164	0.0164384
			Spectrum 83	AM85-126-133-134.1-3, 135, 149.1-5, 178/Corn B/Site 1	16.02	1.03	4.21	63.15	0.73	0.17	0.12	1.08	9	0.22	0.37	2.92	0.2	0.28	0.51		0.105959	0.0191781	0.0295205	0.488836	0.0693151	0.079726	0.0429452	0.0188356	0.0608219	0.0434247	0.0460274	0.00808219	0.0205517	0.170616	0.0164384
			Spectrum 84	AM85-126-133-134.1-3, 135, 149.1-5, 178/Corn B/Site 1	16.17	1.05	4.24	62.74	0.79	0.24	0.17	1.06	8.97	0.21	0.34	2.87	0.24	0.41	0.49		0.0440411	0.000821918	0.000479452	0.0788356	0.00931507	0.00972603	0.00705479	0.00116438	0.0308219	0.0534247	0.0160274	0.0580822	0.0194483	0.0406164	0.0364384
			Spectrum 85	AM85-126-133-134.1-3, 135, 149.1-5, 178/Corn B/Site 1	16.02	1.01	4.26	62.87	0.84	0.21	0.12	1.04	8.98	0.25	0.32	3.01	0.23	0.3	0.54		0.105959	0.0391781	0.0204795	0.208836	0.0406849	0.039726	0.0429452	0.0211644	0.0408219	0.0134247	0.0039726	0.0819178	0.00944828	0.150616	0.0135616
2021-04-05			Spectrum 6	AM89-89_7-8-9.1-3, 25.1-4, 34a1-4, 34b1-2, 39.1-2, 103/Corn B/Site 1	16.2	1.01	4.27	62.37	0.82	0.49	0.18	1.1	8.97	0.24	0.31	2.92	0.16	0.46	0.5		0.0740411	0.0391781	0.0304795	0.291164	0.0206849	0.240274	0.0170548	0.0388356	0.0308219	0.0234247	0.0139726	0.00808219	0.0605517	0.00938356	0.0264384
			Spectrum 7	AM89-89_7-8-9.1-3, 25.1-4, 34a1-4, 34b1-2, 39.1-2, 103/Corn B/Site 1	16	1.06	4.26	62.55	0.78	0.5	0.17	1.06	8.89	0.3	0.32	2.88	0.25	0.52	0.47		0.125959	0.0108219	0.0204795	0.111164	0.0193151	0.250274	0.00705479	0.00116438	0.0491781	0.0365753	0.0039726	0.0480822	0.0294483	0.0693836	0.0564384
			Spectrum 8	AM89-89_7-8-9.1-3, 25.1-4, 34a1-4, 34b1-2, 39.1-2, 103/Corn B/Site 1	16	1.03	4.29	62.59	0.77	0.47	0.18	1.06	8.96	0.25	0.32	2.96	0.21	0.4	0.49		0.125959	0.0191781	0.0504795	0.0711644	0.0293151	0.220274	0.0170548	0.00116438	0.0208219	0.0134247	0.0039726	0.0319178	0.0105517	0.0506164	0.0364384
			Spectrum 9	AM89-89_7-8-9.1-3, 25.1-4, 34a1-4, 34b1-2, 39.1-2, 103/Corn B/Site 1	16.19	1.05	4.26	62.49	0.79	0.46	0.18	1.01	8.88	0.28	0.36	2.9	0.23	0.5	0.44		0.0640411	0.000821918	0.0204795	0.171164	0.00931507	0.210274	0.0170548	0.0511644	0.0591781	0.0165753	0.0360274	0.0280822	0.00944828	0.0493836	0.0864384
			Spectrum 10	AM89-89_7-8-9.1-3, 25.1-4, 34a1-4, 34b1-2, 39.1-2, 103/Corn B/Site 1	16.16	1.07	4.18	62.35	0.81	0.51	0.19	1.04	8.95	0.26	0.36	2.92	0.24	0.41	0.55		0.0340411	0.0208219	0.0595205	0.311164	0.0106849	0.260274	0.0270548	0.0211644	0.0108219	0.00342466	0.0360274	0.00808219	0.0194483	0.0406164	0.0235616
			Spectrum 105	AM89-89_7-8-9.1-3, 25.1-4, 34a1-4, 34b1-2, 39.1-2, 103/Corn B/Site 1	16.06	1.08	4.27	62.46	0.78	0.47	0.17	1.06	8.86	0.26	0.33	3.04	0.2	0.51	0.47		0.0659589	0.0308219	0.0304795	0.201164	0.0193151	0.220274	0.00705479	0.00116438	0.0791781	0.00342466	0.0060274	0.111918	0.0205517	0.0593836	0.0564384
			Spectrum 106	AM89-89_7-8-9.1-3, 25.1-4, 34a1-4, 34b1-2, 39.1-2, 103/Corn B/Site 1	16.06	1.07	4.22	62.48	0.83	0.46	0.16	1.09	8.95	0.24	0.34	2.93	0.22	0.41	0.55		0.0659589	0.0208219	0.0195205	0.181164	0.0306849	0.210274	0.00294521	0.0288356	0.0108219	0.0234247	0.0160274	0.00191781	0.000551724	0.0406164	0.0235616
			Spectrum 107	AM89-89_7-8-9.1-3, 25.1-4, 34a1-4, 34b1-2, 39.1-2, 103/Corn B/Site 1	16.05	1.03	4.2	62.43	0.8	0.47	0.18	1.06	8.91	0.3	0.3	2.97	0.23	0.49	0.58		0.0759589	0.0191781	0.0395205	0.231164	0.000684932	0.220274	0.0170548	0.00116438	0.0291781	0.0365753	0.0239726	0.0419178	0.00944828	0.0393836	0.0535616
			Spectrum 108	AM89-89_7-8-9.1-3, 25.1-4, 34a1-4, 34b1-2, 39.1-2, 103/Corn B/Site 1	16.13	1.01	4.28	62.61	0.75	0.5	0.15	1.08	8.88	0.26	0.39	2.9	0.21	0.34	0.52		0.0040411	0.0391781	0.0404795	0.0511644	0.0493151	0.250274	0.0129452	0.0188356	0.0591781	0.00342466	0.0660274	0.0280822	0.0105517	0.110616	0.00643836
			Spectrum 109	AM89-89_7-8-9.1-3, 25.1-4, 34a1-4, 34b1-2, 39.1-2, 103/Corn B/Site 1	16.08	1.08	4.28	62.5	0.8	0.48	0.15	1.08	8.9	0.28	0.34	2.92	0.22	0.4	0.5		0.0459589	0.0308219	0.0404795	0.161164	0.000684932	0.230274	0.0129452	0.0188356	0.0391781	0.0165753	0.0160274	0.00808219	0.000551724	0.0506164	0.0264384
				Corn B (n=146)	Na2O	MgO	Al2O3	SiO2	P2O5	SO3	Cl	K2O	CaO	MnO	FeO	CuO	ZnO	Sb2O5	PbO
				Measured	16.126	1.04918	4.23952	62.6612	0.799315	0.249726	0.162945	1.06116	8.93918	0.263425	0.323973	2.92808	0.220552	0.450616	0.526438
				Published	17	1.03	4.36	61.55	0.82	0.49	0.16	1	8.56	0.25	0.31	2.66	0.19	0.46	0.61
				Error	-5.14142	1.86195	-2.76329	1.8053	-2.52255	-49.0355	1.84075	6.11644	4.42965	5.36986	4.50729	10.0783	16.0799	-2.0399	-13.6986
				Presicion	0.0819309	0.0206155	0.0299578	0.095258	0.0283749	0.0331676	0.0173363	0.0151436	0.0518596	0.0230644	0.0222443	0.0395947	0.0362173	0.056079	0.0403134

## Sheet: Bulk analysis (1)
			Spectrum Label	Project Path	Na	Mg	Al	Si	P	S	Cl	K	Ca	Ti	Mn	Fe				Project Path	Na2O	MgO	Al2O3	SiO2	P2O5	SO3	Cl	K2O	CaO	TiO2	MnO	FeO
																				AM77-42a	13.826	0.61	3.154	70.602	0.078	0.07	0.696	0.776	9.624	0.102	0.014	0.448
			Spectrum 5	AM77-42a/Site 1	13.8	0.6	3.23	70.73	0.11	0.06	0.7	0.78	9.44	0.11	0.01	0.44				AM77-42b1	14.41	0.99	2.72	72.488	0.01	0.052	0.788	0.526	7.528	0.102	0.012	0.378
			Spectrum 6	AM77-42a/Site 1	13.92	0.63	3.12	70.46	0.07	0.08	0.67	0.75	9.75	0.09	0.01	0.44				AM77-42b2	13.88	1.402	2.696	71.618	0.012	0.048	0.706	0.518	8.6	0.116	0.022	0.394
			Spectrum 7	AM77-42a/Site 1	13.75	0.58	3.16	70.81	0.05	0.06	0.75	0.79	9.51	0.07	0	0.47				AM77-42b3	14.054	1.18	2.702	72.152	0.018	0.048	0.744	0.53	8.054	0.114	0.024	0.378
			Spectrum 8	AM77-42a/Site 1	13.88	0.6	3.14	70.49	0.08	0.07	0.68	0.79	9.7	0.13	0.02	0.42				AM77-42c1	12.8483	1.68667	2.69333	71.025	0.0133333	0.0416667	0.663333	0.508333	10.0133	0.0916667	0.0183333	0.4
			Spectrum 9	AM77-42a/Site 1	13.78	0.64	3.12	70.52	0.08	0.08	0.68	0.77	9.72	0.11	0.03	0.47				AM77-42c2	15.23	0.76	2.754	72.196	0.03	0.072	0.884	0.592	7.02	0.082	0.012	0.37
																				AM77-42c3	14.228	0.816	2.836	71.86	0.012	0.058	0.818	0.762	8.008	0.092	0.052	0.458
				AM77-42a	13.826	0.61	3.154	70.602	0.078	0.07	0.696	0.776	9.624	0.102	0.014	0.448
			Spectrum 41	AM77-42b1/Site 1	14.42	0.95	2.7	72.65	0.02	0.05	0.8	0.5	7.44	0.1	0	0.37
			Spectrum 42	AM77-42b1/Site 1	14.46	0.99	2.71	72.42	0	0.07	0.78	0.53	7.56	0.07	0	0.41
			Spectrum 43	AM77-42b1/Site 1	14.34	0.95	2.71	72.67	0	0.05	0.79	0.55	7.41	0.13	0	0.4
			Spectrum 44	AM77-42b1/Site 1	14.43	1.01	2.72	72.4	0.03	0.06	0.78	0.54	7.56	0.09	0.04	0.33
			Spectrum 45	AM77-42b1/Site 1	14.4	1.05	2.76	72.3	0	0.03	0.79	0.51	7.67	0.12	0.02	0.38
				AM77-42b1	14.41	0.99	2.72	72.488	0.01	0.052	0.788	0.526	7.528	0.102	0.012	0.378
			Spectrum 46	AM77-42b2/Site 1	13.9	1.41	2.65	71.57	0.02	0.06	0.72	0.52	8.57	0.12	0.06	0.41
			Spectrum 47	AM77-42b2/Site 1	13.83	1.39	2.74	71.69	0.02	0.03	0.69	0.51	8.58	0.11	0.02	0.4
			Spectrum 48	AM77-42b2/Site 1	13.91	1.42	2.68	71.54	0.02	0.05	0.7	0.5	8.67	0.14	0.01	0.38
			Spectrum 49	AM77-42b2/Site 1	13.89	1.34	2.71	71.73	0	0.05	0.7	0.54	8.53	0.13	0	0.39
			Spectrum 50	AM77-42b2/Site 1	13.87	1.45	2.7	71.56	0	0.05	0.72	0.52	8.65	0.08	0.02	0.39
				AM77-42b2	13.88	1.402	2.696	71.618	0.012	0.048	0.706	0.518	8.6	0.116	0.022	0.394
			Spectrum 51	AM77-42b3/Site 1	14.08	1.15	2.77	72.08	0.01	0.04	0.72	0.52	8.08	0.09	0.03	0.43
			Spectrum 52	AM77-42b3/Site 1	13.98	1.26	2.68	72.04	0.02	0.06	0.74	0.53	8.18	0.11	0.02	0.38
			Spectrum 53	AM77-42b3/Site 1	14.05	1.19	2.71	72.18	0.02	0.04	0.75	0.54	8	0.12	0.01	0.38
			Spectrum 54	AM77-42b3/Site 1	14.12	1.12	2.68	72.16	0	0.04	0.75	0.55	8.05	0.15	0	0.37
			Spectrum 55	AM77-42b3/Site 1	14.04	1.18	2.67	72.3	0.04	0.06	0.76	0.51	7.96	0.1	0.06	0.33
				AM77-42b3	14.054	1.18	2.702	72.152	0.018	0.048	0.744	0.53	8.054	0.114	0.024	0.378
			Spectrum 65	AM77-42c1/Site 1	13.3	1.62	2.71	70.92	0.02	0.04	0.67	0.5	9.71	0.1	0.04	0.38
			Spectrum 66	AM77-42c1/Site 1	13.19	1.66	2.68	70.95	0	0.04	0.67	0.5	9.87	0.09	0	0.36
			Spectrum 67	AM77-42c1/Site 1	13	1.73	2.72	70.69	0	0.06	0.65	0.5	10.13	0.06	0.02	0.44
			Spectrum 68	AM77-42c1/Site 1	13.33	1.55	2.69	70.91	0	0.03	0.67	0.5	9.81	0.12	0.02	0.38
			Spectrum 69	AM77-42c1/Site 1	11.37	1.78	2.67	71.96	0.01	0.04	0.67	0.51	10.41	0.09	0.02	0.45
			Spectrum 70	AM77-42c1/Site 1	12.9	1.78	2.69	70.72	0.05	0.04	0.65	0.54	10.15	0.09	0.01	0.39
				AM77-42c1	12.8483	1.68667	2.69333	71.025	0.0133333	0.0416667	0.663333	0.508333	10.0133	0.0916667	0.0183333	0.4
			Spectrum 71	AM77-42c2/Site 1	15.16	0.83	2.71	72.13	0.05	0.08	0.85	0.6	7.16	0.09	0	0.35
			Spectrum 72	AM77-42c2/Site 1	14.99	0.75	2.7	72.54	0.08	0.04	0.88	0.57	7.02	0.04	0.01	0.38
			Spectrum 73	AM77-42c2/Site 1	14.83	0.7	2.73	73.08	0.02	0.07	0.87	0.56	6.63	0.09	0.01	0.4
			Spectrum 74	AM77-42c2/Site 1	16.22	0.63	2.89	71.08	0	0.08	1.01	0.63	7	0.08	0.02	0.37
			Spectrum 75	AM77-42c2/Site 1	14.95	0.89	2.74	72.15	0	0.09	0.81	0.6	7.29	0.11	0.02	0.35
				AM77-42c2	15.23	0.76	2.754	72.196	0.03	0.072	0.884	0.592	7.02	0.082	0.012	0.37
			Spectrum 76	AM77-42c3/Site 1	14.33	0.78	2.85	71.93	0.01	0.06	0.84	0.79	7.84	0.12	0.04	0.43
			Spectrum 77	AM77-42c3/Site 1	14.29	0.86	2.77	71.71	0	0.06	0.82	0.75	8.08	0.09	0.05	0.51
			Spectrum 78	AM77-42c3/Site 1	14.3	0.81	2.79	71.87	0.01	0.06	0.83	0.73	8.04	0.08	0.06	0.42
			Spectrum 79	AM77-42c3/Site 1	14.14	0.8	2.89	71.84	0	0.05	0.8	0.77	8.11	0.1	0.06	0.44
			Spectrum 80	AM77-42c3/Site 1	14.08	0.83	2.88	71.95	0.04	0.06	0.8	0.77	7.97	0.07	0.05	0.49
				AM77-42c3	14.228	0.816	2.836	71.86	0.012	0.058	0.818	0.762	8.008	0.092	0.052	0.458

## Sheet: Bulk analysis (2)
		Spectrum Label	Project Path	Na	Mg	Al	Si	P	S	Cl	K	Ca	Ti	Mn	Fe				Project Path	NaO	MgO	Al2O3	SiO2	P2O5	SO3	Cl	K2O	CaO	TiO2	MnO	FeO
		Spectrum 11	AM78-109/Site 1	14.63	0.44	2.68	71.81	0.02	0.05	0.79	0.87	8.28	0.07	0.07	0.28				AM78-109	14.764	0.444	2.696	71.648	0.024	0.05	0.802	0.886	8.312	0.05	0.048	0.274
		Spectrum 12	AM78-109/Site 1	14.76	0.44	2.69	71.61	0.05	0.04	0.8	0.89	8.33	0.06	0.05	0.28				AM78-205	18.08	0.884	2.184	68.808	0.036	0.128	1.086	0.434	6.462	0.144	0.774	0.982
		Spectrum 13	AM78-109/Site 1	14.74	0.47	2.69	71.59	0.02	0.05	0.82	0.91	8.37	0.04	0.01	0.28				AM78-604a	19.68	0.828	2.192	65.298	0.084	0.168	0.984	0.566	7.154	0.218	1.43	1.392
		Spectrum 14	AM78-109/Site 1	14.82	0.44	2.72	71.53	0.03	0.04	0.8	0.88	8.35	0.04	0.07	0.28				AM78-604b	12.814	0.618	3.342	69.31	0.124	0.028	0.81	0.75	11.654	0.114	0.03	0.568
		Spectrum 15	AM78-109/Site 1	14.87	0.43	2.7	71.7	0	0.07	0.8	0.88	8.23	0.04	0.04	0.25				AM78-605	13.4	0.62	3.2	70.996	0.148	0.062	0.664	0.99	9.328	0.114	0.02	0.462
																			AM78-608	14.354	0.676	3.236	70.62	0.0375	0.02	0.966	0.61	8.996	0.085	0.0175	0.422
			AM78-109	14.764	0.444	2.696	71.648	0.024	0.05	0.802	0.886	8.312	0.05	0.048	0.274				AM78-609a	14.33	0.76	3.076	68.228	0.096	0.038	0.808	0.61	11.384	0.11	0.014	0.538
																			AM78-609b	14.298	0.766	3.078	68.244	0.11	0.028	0.814	0.618	11.408	0.094	0.036	0.504
		Spectrum 16	AM78-205/Site 1	18.09	0.9	2.16	68.82	0.04	0.13	1.07	0.44	6.47	0.16	0.75	0.97
		Spectrum 17	AM78-205/Site 1	18.12	0.89	2.18	68.78	0.04	0.12	1.1	0.42	6.46	0.11	0.81	0.97
		Spectrum 18	AM78-205/Site 1	18.08	0.89	2.22	68.78	0.03	0.13	1.07	0.44	6.49	0.12	0.77	0.99
		Spectrum 19	AM78-205/Site 1	18.04	0.89	2.16	68.86	0.03	0.13	1.09	0.44	6.44	0.15	0.78	0.99
		Spectrum 20	AM78-205/Site 1	18.07	0.85	2.2	68.8	0.04	0.13	1.1	0.43	6.45	0.18	0.76	0.99
			AM78-205	18.08	0.884	2.184	68.808	0.036	0.128	1.086	0.434	6.462	0.144	0.774	0.982
		Spectrum 21	AM78-604a/Site 1	19.71	0.84	2.16	65.3	0.1	0.17	0.98	0.54	7.16	0.19	1.46	1.37
		Spectrum 22	AM78-604a/Site 1	19.74	0.84	2.18	65.25	0.04	0.19	1	0.55	7.15	0.25	1.4	1.4
		Spectrum 23	AM78-604a/Site 1	19.64	0.82	2.17	65.35	0.12	0.17	0.98	0.59	7.13	0.22	1.44	1.37
		Spectrum 24	AM78-604a/Site 1	19.71	0.83	2.22	65.26	0.07	0.17	0.98	0.56	7.21	0.17	1.42	1.41
		Spectrum 25	AM78-604a/Site 1	19.6	0.81	2.23	65.33	0.09	0.14	0.98	0.59	7.12	0.26	1.43	1.41
			AM78-604a	19.68	0.828	2.192	65.298	0.084	0.168	0.984	0.566	7.154	0.218	1.43	1.392
		Spectrum 26	AM78-604b/Site 1	13.02	0.57	3.29	69.58	0.11	0.02	0.8	0.71	11.11	0.12	0.07	0.59
		Spectrum 27	AM78-604b/Site 1	12.71	0.63	3.4	69.18	0.13	0.03		0.74	12.42	0.12		0.61
		Spectrum 28	AM78-604b/Site 1	12.93	0.64	3.32	69.66	0.09	0.04	0.79	0.73	11.15	0.12	0.03	0.5
		Spectrum 29	AM78-604b/Site 1	12.87	0.58	3.32	69.54	0.12	0.03	0.82	0.82	11.25	0.1	0.01	0.54
		Spectrum 30	AM78-604b/Site 1	12.54	0.67	3.38	68.59	0.17	0.02	0.83	0.75	12.34	0.11	0.01	0.6
			AM78-604b	12.814	0.618	3.342	69.31	0.124	0.028	0.81	0.75	11.654	0.114	0.03	0.568
		Spectrum 51	AM78-605/Site 1	13.42	0.61	3.2	70.94	0.15	0.07	0.67	1.01	9.35	0.09	0.01	0.47
		Spectrum 52	AM78-605/Site 1	13.39	0.62	3.24	70.92	0.19	0.06	0.67	1.01	9.33	0.12	0.02	0.44
		Spectrum 53	AM78-605/Site 1	13.39	0.61	3.2	71.06	0.14	0.06	0.65	0.98	9.31	0.11	0.03	0.46
		Spectrum 54	AM78-605/Site 1	13.43	0.64	3.16	70.99	0.1	0.05	0.66	0.98	9.36	0.13	0.04	0.46
		Spectrum 55	AM78-605/Site 1	13.37	0.62	3.2	71.07	0.16	0.07	0.67	0.97	9.29	0.12	0	0.48
			AM78-605	13.4	0.62	3.2	70.996	0.148	0.062	0.664	0.99	9.328	0.114	0.02	0.462
		Spectrum 58	AM78-608/Site 1	14.39	0.69	3.25	70.67	0.03	0.03	0.94	0.61	8.97	0.06	0	0.37
		Spectrum 59	AM78-608/Site 1	14.38	0.66	3.21	70.66			0.98	0.61	9.06			0.45
		Spectrum 60	AM78-608/Site 1	14.32	0.67	3.24	70.59	0.03	0.01	0.98	0.61	9	0.1	0.02	0.44
		Spectrum 61	AM78-608/Site 1	14.35	0.7	3.26	70.51	0.07	0.02	0.97	0.6	8.95	0.1	0.05	0.43
		Spectrum 62	AM78-608/Site 1	14.33	0.66	3.22	70.67	0.02	0.02	0.96	0.62	9	0.08	0	0.42
			AM78-608	14.354	0.676	3.236	70.62	0.0375	0.02	0.966	0.61	8.996	0.085	0.0175	0.422
		Spectrum 63	AM78-609a/Site 1	14.38	0.73	3.1	68.14	0.13	0.04	0.81	0.63	11.36	0.13	0.01	0.52
		Spectrum 64	AM78-609a/Site 1	14.27	0.79	3.1	68.34	0.09	0.04	0.8	0.61	11.32	0.1	0	0.53
		Spectrum 65	AM78-609a/Site 1	14.24	0.76	3.1	68.2	0.08	0.02	0.79	0.61	11.5	0.13	0	0.56
		Spectrum 66	AM78-609a/Site 1	14.44	0.77	3	68.24	0.08	0.04	0.82	0.6	11.33	0.07	0.03	0.57
		Spectrum 67	AM78-609a/Site 1	14.32	0.75	3.08	68.22	0.1	0.05	0.82	0.6	11.41	0.12	0.03	0.51
			AM78-609a	14.33	0.76	3.076	68.228	0.096	0.038	0.808	0.61	11.384	0.11	0.014	0.538
		Spectrum 68	AM78-609b/Site 1	14.36	0.76	3.12	68.02	0.13	0.03	0.83	0.6	11.48	0.12	0.04	0.5
		Spectrum 69	AM78-609b/Site 1	14.28	0.73	3.06	68.42	0.1	0.04	0.81	0.62	11.35	0.08	0.02	0.49
		Spectrum 70	AM78-609b/Site 1	14.35	0.78	3.09	68.2	0.11	0.03	0.83	0.64	11.34	0.08	0.05	0.51
		Spectrum 71	AM78-609b/Site 1	14.28	0.79	3.06	68.27	0.08	0.02	0.79	0.61	11.46	0.12	0.01	0.52
		Spectrum 72	AM78-609b/Site 1	14.22	0.77	3.06	68.31	0.13	0.02	0.81	0.62	11.41	0.07	0.06	0.5
			AM78-609b	14.298	0.766	3.078	68.244	0.11	0.028	0.814	0.618	11.408	0.094	0.036	0.504

## Sheet: Bulk analysis (3)
			Na2O	MgO	Al2O3	SiO2	P2O5	SO3	Cl	K2O	CaO	TiO2	MnO	FeO	Total				Na2O	MgO	Al2O3	SiO2	P2O5	SO3	Cl	K2O	CaO	TiO2	MnO	FeO	Total
		AM77-28j/Site	15.05	0.77	3.14	70.79	0	0.04	0.92	0.49	8.27	0.11	0.02	0.42
		AM77-28j/Site	15.02	0.82	3.11	70.79	0.02	0.08	0.93	0.49	8.33	0.08	0	0.35				AM77-28j	15.03	0.796	3.106	70.778	0.004	0.06	0.924	0.502	8.326	0.09	0.026	0.382
		AM77-28j/Site	14.99	0.82	3.11	70.79	0	0.05	0.92	0.49	8.34	0.08	0.05	0.35				AM77-28n	18.396	0.956	2.188	65.526	0.076	0.182	0.874	0.624	8.248	0.138	1.938	0.86	100
		AM77-28j/Site	15	0.79	3.09	70.85	0	0.06	0.92	0.53	8.29	0.09	0.01	0.37				AM77-36a	14.726	0.9	2.74	72.302	0.016	0.056	0.814	0.578	7.386	0.088	0.014	0.382	100
		AM77-28j/Site	15.09	0.78	3.08	70.67	0	0.07	0.93	0.51	8.4		0.05	0.42				AM77-36b	13.572	1.618	2.666	71.066	0.014	0.042	0.61	0.514	9.376	0.108	0.008	0.406	100
																		AM77-37b	14.57	0.914	2.734	72.638	0.016	0.06	0.822	0.516	7.232	0.116	0.01	0.364	100
		AM77-28j	15.03	0.796	3.106	70.778	0.004	0.06	0.924	0.502	8.326	0.09	0.026	0.382				AM77-37d	12.04	0.782	2.9375	71.448	0.064	0.032	0.692	0.958	10.114	0.112	0.096	0.528	99.216
		AM77-28n/Site 1	18.39	0.93	2.2	65.64	0.1	0.18	0.87	0.62	8.22	0.13	1.87	0.87	100
		AM77-28n/Site 1	18.43	0.99	2.17	65.52	0.07	0.18	0.88	0.61	8.22	0.13	1.96	0.84	100
		AM77-28n/Site 1	18.41	0.97	2.2	65.5	0.08	0.17	0.88	0.64	8.23	0.16	1.92	0.85	100
		AM77-28n/Site 1	18.39	0.94	2.17	65.47	0.06	0.19	0.86	0.63	8.25	0.16	1.98	0.89	100
		AM77-28n/Site 1	18.36	0.95	2.2	65.5	0.07	0.19	0.88	0.62	8.32	0.11	1.96	0.85	100
		AM77-28n	18.396	0.956	2.188	65.526	0.076	0.182	0.874	0.624	8.248	0.138	1.938	0.86	100
		AM77-36a/Site 1	14.72	0.85	2.73	72.44	0.02	0.06	0.8	0.56	7.37	0.1	0.01	0.34	100
		AM77-36a/Site 1	14.65	0.98	2.81	72.08	0.01	0.04	0.79	0.57	7.53	0.11	0	0.42	100
		AM77-36a/Site 1	14.77	0.9	2.7	72.17	0.03	0.06	0.82	0.59	7.46	0.06	0.01	0.45	100
		AM77-36a/Site 1	14.65	0.97	2.73	72.17	0	0.08	0.8	0.6	7.47	0.1	0.04	0.39	100
		AM77-36a/Site 1	14.84	0.8	2.73	72.65	0.02	0.04	0.86	0.57	7.1	0.07	0.01	0.31	100
		AM77-36a	14.726	0.9	2.74	72.302	0.016	0.056	0.814	0.578	7.386	0.088	0.014	0.382	100
		AM77-36b/Site 1	13.66	1.58	2.66	70.98	0.03	0.04	0.59	0.51	9.43	0.11	0	0.4	100
		AM77-36b/Site 1	13.52	1.61	2.63	71.11	0.02	0.04	0.61	0.49	9.44	0.12	0.01	0.4	100
		AM77-36b/Site 1	13.55	1.63	2.66	71.09	0	0.05	0.63	0.53	9.33	0.12	0	0.43	100
		AM77-36b/Site 1	13.55	1.65	2.69	70.99	0.02	0.04	0.61	0.51	9.41	0.1	0.03	0.39	100
		AM77-36b/Site 1	13.58	1.62	2.69	71.16	0	0.04	0.61	0.53	9.27	0.09	0	0.41	100
		AM77-36b	13.572	1.618	2.666	71.066	0.014	0.042	0.61	0.514	9.376	0.108	0.008	0.406	100
		AM77-37b/Site 1	14.64	0.9	2.71	72.69	0	0.05	0.82	0.52	7.19	0.11	0	0.36	100
		AM77-37b/Site 1	14.49	0.9	2.71	72.61	0.03	0.06	0.84	0.49	7.32	0.13	0.01	0.4	100
		AM77-37b/Site 1	14.61	0.9	2.75	72.6	0.01	0.07	0.82	0.54	7.21	0.13	0	0.35	100
		AM77-37b/Site 1	14.62	0.92	2.76	72.63	0.03	0.06	0.81	0.5	7.22	0.12	0	0.33	100
		AM77-37b/Site 1	14.49	0.95	2.74	72.66	0.01	0.06	0.82	0.53	7.22	0.09	0.04	0.38	100
		AM77-37b	14.57	0.914	2.734	72.638	0.016	0.06	0.822	0.516	7.232	0.116	0.01	0.364	100
		AM77-37d/Site 1	12.07	0.71	2.46	71.41	0.06	0.04	0.71	0.97	10.17	0.11	0.06	0.53	99.3
		AM77-37d/Site 1	12.1	0.81	3.12	71.32	0.07	0.01	0.71	0.95	10.15	0.1	0.14	0.52	100
		AM77-37d/Site 1	12.1	0.82	3.05	71.36	0.11	0.03	0.69	0.96	10.1	0.12	0.13	0.53	100
		AM77-37d/Site 1	12.1	0.8	3.12	71.36	0.02	0.03	0.66	0.97	10.18	0.11	0.1	0.54	100
		AM77-37d/Site 1	11.83	0.77		71.79	0.06	0.05	0.69	0.94	9.97	0.12	0.05	0.52	96.78
		AM77-37d	12.04	0.782	2.9375	71.448	0.064	0.032	0.692	0.958	10.114	0.112	0.096	0.528	99.216

## Sheet: Bulk analysis (4)
				Spectrum Label	Project Path	Na2O	MgO	Al2O3	SiO2	P2O5	SO3	Cl	K2O	CaO	TiO2	MnO	FeO	Total				Na2O	MgO	Al2O3	SiO2	P2O5	SO3	Cl	K2O	CaO	TiO2	MnO	FeO
																					AM77-38a1	14.676	0.626	3.036	70.21	0.072	0.048	0.832	0.686	9.334	0.072	0.018	0.392
					AM77_38a1/Site	14.72	0.61	3.02	70.4	0.1	0.04	0.84	0.69	9.1	0.08	0	0.39				AM77-38a2	14.8	0.578	3.16	70.448	0.022	0.076	0.794	0.426	9.198	0.078	0.016	0.4
					AM77_38a1/Site	14.71	0.62	2.98	70.14	0.09	0.05	0.83	0.68	9.45	0.06	0	0.39				AM77-38a3	16.19	0.612	2.972	68.722	0.11	0.074	0.812	0.646	9.422	0.056	0.024	0.354
					AM77_38a1/Site	14.7	0.64	3.08	70.21	0.02	0.06	0.86	0.7	9.18	0.09	0.04	0.42				AM77-38a4	14.604	0.576	3.168	70.59	0.018	0.08	0.824	0.436	9.158	0.11	0.03	0.408
					AM77_38a1/Site	14.64	0.62	3.05	70.13	0.06	0.05	0.81	0.69	9.49	0.07	0.01	0.38				AM77-38a5	14.358	0.708	3.272	70.244	0.016	0.048	0.94	0.388	9.504	0.088	0.02	0.412
					AM77_38a1/Site	14.61	0.64	3.05	70.17	0.09	0.04	0.82	0.67	9.45	0.06	0.04	0.38				AM77-38b1	18.674	0.904	2.254	66.062	0.056	0.184	0.884	0.622	8.13	0.132	1.45	0.65
																					AM77-38b2	17.98	1.036	2.51	66.428	0.104	0.17	0.85	0.782	7.242	0.198	1.926	0.778
					AM77-38a1	14.676	0.626	3.036	70.21	0.072	0.048	0.832	0.686	9.334	0.072	0.018	0.392				AM77-38b3	14.938	0.532	3.178	70.672	0.004	0.06	0.818	0.392	8.8	0.11	0.024	0.474
																					AM77-38b4	11.487	0.783	3.112	72.026	0.066	0.041	0.65	0.993	10.15	0.088	0.089	0.515
				Spectrum 21	AM77_38a2/Site 1	14.83	0.55	3.16	70.4	0.03	0.08	0.8	0.42	9.23	0.08	0.03	0.39	100
				Spectrum 22	AM77_38a2/Site 1	14.84	0.58	3.12	70.55	0	0.07	0.79	0.42	9.17	0.08	0.01	0.38	100
				Spectrum 23	AM77_38a2/Site 1	14.73	0.56	3.17	70.49	0.02	0.08	0.79	0.41	9.26	0.08	0.01	0.4	100
				Spectrum 24	AM77_38a2/Site 1	14.76	0.61	3.16	70.48	0.03	0.07	0.77	0.44	9.16	0.09	0.01	0.4	100
				Spectrum 25	AM77_38a2/Site 1	14.84	0.59	3.19	70.32	0.03	0.08	0.82	0.44	9.17	0.06	0.02	0.43	100
					AM77-38a2	14.8	0.578	3.16	70.448	0.022	0.076	0.794	0.426	9.198	0.078	0.016	0.4
				Spectrum 29	AM77_38a3/Site 1	16.17	0.58	2.99	68.74	0.11	0.08	0.81	0.65	9.45	0.06	0.01	0.33	100
				Spectrum 30	AM77_38a3/Site 1	16.23	0.59	2.96	68.82	0.06	0.06	0.83	0.66	9.38	0.04	0.03	0.35	100
				Spectrum 31	AM77_38a3/Site 1	16.19	0.64	2.98	68.66	0.13	0.09	0.81	0.63	9.45	0.05	0.02	0.35	100
				Spectrum 32	AM77_38a3/Site 1	16.18	0.63	2.98	68.69	0.13	0.07	0.81	0.65	9.42	0.07	0	0.37	100
				Spectrum 33	AM77_38a3/Site 1	16.18	0.62	2.95	68.7	0.12	0.07	0.8	0.64	9.41	0.06	0.06	0.37	100
					AM77-38a3	16.19	0.612	2.972	68.722	0.11	0.074	0.812	0.646	9.422	0.056	0.024	0.354
				Spectrum 38	AM77_38a4/Site 1	14.68	0.58	3.23	70.49	0.04	0.08	0.81	0.43	9.12	0.11	0.03	0.41	100
				Spectrum 39	AM77_38a4/Site 1	14.56	0.59	3.16	70.54	0.01	0.08	0.84	0.41	9.31	0.09	0.04	0.36	100
				Spectrum 40	AM77_38a4/Site 1	14.55	0.59	3.14	70.62	0.02	0.09	0.83	0.44	9.11	0.11	0.06	0.44	100
				Spectrum 41	AM77_38a4/Site 1	14.66	0.57	3.11	70.66	0.01	0.06	0.82	0.45	9.12	0.12	0.01	0.41	100
				Spectrum 42	AM77_38a4/Site 1	14.57	0.55	3.2	70.64	0.01	0.09	0.82	0.45	9.13	0.12	0.01	0.42	100
					AM77-38a4	14.604	0.576	3.168	70.59	0.018	0.08	0.824	0.436	9.158	0.11	0.03	0.408
				Spectrum 43	AM77_38a5/Site 1	14.28	0.68	3.32	70.37	0.01	0.05	0.91	0.39	9.46	0.12	0	0.42	100
				Spectrum 44	AM77_38a5/Site 1	14.48	0.71	3.28	70.09	0.02	0.06	0.95	0.39	9.56	0.05	0.01	0.4	100
				Spectrum 45	AM77_38a5/Site 1	14.31	0.73	3.25	70.26	0.05	0.03	0.98	0.39	9.49	0.09	0.01	0.4	100
				Spectrum 46	AM77_38a5/Site 1	14.3	0.72	3.29	70.38	0	0.05	0.92	0.38	9.39	0.08	0.05	0.44	100
				Spectrum 47	AM77_38a5/Site 1	14.42	0.7	3.22	70.12	0	0.05	0.94	0.39	9.62	0.1	0.03	0.4	100
					AM77-38a5	14.358	0.708	3.272	70.244	0.016	0.048	0.94	0.388	9.504	0.088	0.02	0.412
				Spectrum 48	AM77_38b1/Site 1	18.69	0.87	2.27	66.09	0.05	0.19	0.88	0.61	8.16	0.13	1.42	0.64	100
				Spectrum 49	AM77_38b1/Site 1	18.71	0.88	2.27	66.07	0.08	0.17	0.88	0.64	8.08	0.17	1.41	0.64	100
				Spectrum 50	AM77_38b1/Site 1	18.61	0.91	2.21	66.22	0.05	0.18	0.88	0.59	8.12	0.13	1.45	0.65	100
				Spectrum 51	AM77_38b1/Site 1	18.75	0.95	2.28	65.9	0.03	0.19	0.89	0.61	8.11	0.12	1.53	0.65	100
				Spectrum 52	AM77_38b1/Site 1	18.61	0.91	2.24	66.03	0.07	0.19	0.89	0.66	8.18	0.11	1.44	0.67	100
					AM77-38b1	18.674	0.904	2.254	66.062	0.056	0.184	0.884	0.622	8.13	0.132	1.45	0.65
				Spectrum 53	AM77_38b2/Site 1	17.96	1.04	2.51	66.44	0.11	0.17	0.83	0.77	7.23	0.19	1.98	0.77	100
				Spectrum 54	AM77_38b2/Site 1	18.03	0.99	2.52	66.48	0.14	0.16	0.87	0.8	7.18	0.18	1.88	0.77	100
				Spectrum 55	AM77_38b2/Site 1	17.96	1.05	2.48	66.51	0.1	0.16	0.85	0.78	7.22	0.21	1.94	0.75	100
				Spectrum 56	AM77_38b2/Site 1	18.02	1.04	2.5	66.39	0.09	0.18	0.85	0.8	7.26	0.2	1.89	0.8	100
				Spectrum 57	AM77_38b2/Site 1	17.93	1.06	2.54	66.32	0.08	0.18	0.85	0.76	7.32	0.21	1.94	0.8	100
					AM77-38b2	17.98	1.036	2.51	66.428	0.104	0.17	0.85	0.782	7.242	0.198	1.926	0.778
				Spectrum 58	AM77_38b3/Site 1	14.93	0.51	3.22	70.67	0	0.06	0.8	0.4	8.82	0.12	0.01	0.47	100
				Spectrum 59	AM77_38b3/Site 1	14.94	0.54	3.17	70.64	0	0.06	0.82	0.39	8.83	0.09	0.02	0.51	100
				Spectrum 60	AM77_38b3/Site 1	14.91	0.51	3.16	70.67	0.01	0.08	0.82	0.4	8.8	0.12	0.06	0.46	100
				Spectrum 61	AM77_38b3/Site 1	15	0.53	3.15	70.68	0.01	0.04	0.83	0.39	8.75	0.11	0.01	0.49	100
				Spectrum 62	AM77_38b3/Site 1	14.91	0.57	3.19	70.7	0	0.06	0.82	0.38	8.8	0.11	0.02	0.44	100
					AM77-38b3	14.938	0.532	3.178	70.672	0.004	0.06	0.818	0.392	8.8	0.11	0.024	0.474
				Spectrum 63	AM77_38b4/Site 1	11.97	0.8	3.09	71.42	0.04	0.05	0.69	0.96	10.28	0.05	0.12	0.54	100
				Spectrum 64	AM77_38b4/Site 1	11.76	0.77	3.07	71.54	0.08	0.04	0.65	0.97	10.38	0.08	0.12	0.54	100
				Spectrum 65	AM77_38b4/Site 1	11.53	0.77	3.15	72.11	0.06	0.06	0.67	0.97	10.01	0.1	0.09	0.5	100
				Spectrum 66	AM77_38b4/Site 1	11.52	0.79	3.07	72.11	0.07	0.04	0.64	1	10.07	0.11	0.09	0.48	100
				Spectrum 67	AM77_38b4/Site 1	11.55	0.81	3.09	71.91	0.06	0.02	0.63	0.99	10.15	0.11	0.1	0.58	100
				Spectrum 77	AM77_38b4/Site 4	11.41	0.76	3.17	72.1	0.1	0.03	0.63	1	10.1	0.09	0.09	0.5	100
				Spectrum 78	AM77_38b4/Site 4	11.35	0.8	3.12	72.15	0.07	0.05	0.66	0.99	10.19	0.06	0.06	0.52	100
				Spectrum 79	AM77_38b4/Site 4	11.25	0.77	3.09	72.29	0.11	0.03	0.64	1.02	10.12	0.08	0.06	0.54	100
				Spectrum 80	AM77_38b4/Site 4	11.24	0.78	3.12	72.36	0.06	0.05	0.64	1.01	10.1	0.09	0.09	0.46	100
				Spectrum 81	AM77_38b4/Site 4	11.29	0.78	3.15	72.27	0.01	0.04	0.65	1.02	10.1	0.11	0.07	0.49	100
					AM77-38b4	11.487	0.783	3.112	72.026	0.066	0.041	0.65	0.993	10.15	0.088	0.089	0.515

## Sheet: Bulk analysis (5)
			Spectrum Label	Project Path	Na2O	MgO	Al2O3	SiO2	P2O5	SO3	Cl	K2O	CaO	TiO2	MnO	FeO
			Spectrum 11	AM77-39a/Site 1	18.09	0.98	2.18	65.63	0.05	0.19	0.89	0.66	8.34	0.16	2	0.83
			Spectrum 12	AM77-39a/Site 1	18.12	0.93	2.16	65.8	0.08	0.18	0.87	0.65	8.32	0.14	1.9	0.85			Project Path	Na2O	MgO	Al2O3	SiO2	P2O5	SO3	Cl	K2O	CaO	TiO2	MnO	FeO
			Spectrum 13	AM77-39a/Site 1	18.19	0.96	2.12	65.8	0.07	0.17	0.88	0.62	8.24	0.12	1.96	0.88			AM77-39a	18.17	0.95	2.16	65.752	0.054	0.176	0.88	0.626	8.288	0.152	1.946	0.85
			Spectrum 14	AM77-39a/Site 1	18.16	0.95	2.19	65.81	0.04	0.16	0.87	0.6	8.26	0.19	1.92	0.86			AM77-39b1	15.627	0.55	3.144	70.246	0.004	0.05	0.934	0.76	8.195	0.088	0.024	0.378
			Spectrum 15	AM77-39a/Site 1	18.29	0.93	2.15	65.72	0.03	0.18	0.89	0.6	8.28	0.15	1.95	0.83			AM77-39b2	15.76	0.57	3.118	70.756	0.006	0.054	1.012	0.508	7.68	0.088	0.035	0.42
																			AM77-39b3	17.416	1.156	2.436	66.334	0.072	0.152	0.924	0.636	7.932	0.154	1.9	0.886
				AM77-39a	18.17	0.95	2.16	65.752	0.054	0.176	0.88	0.626	8.288	0.152	1.946	0.85			AM77-39c1	16.968	0.988	2.424	67.434	0.04	0.142	0.858	0.65	8.2	0.162	1.326	0.818
																			AM77-39c2	15.39	0.858	2.956	69.34	0.09	0.068	0.928	0.782	8.964	0.088	0.038	0.49
				AM77-39b1/Site 1	15.69	0.55	3.12	70.26	0	0.05	0.94	0.73	8.16	0.07	0.03	0.39			AM77-39c3	14.29	0.676	2.886	68.542	0.1175	0.06	0.638	0.748	11.454	0.126	0.0425	0.454
				AM77-39b1/Site 1	15.56	0.51	3.12	70.34	0	0.06	0.94	0.79	8.24	0.1	0	0.36
				AM77-39b1/Site 1	15.63	0.54	3.16	70.22	0.01	0.05	0.95	0.74	8.23	0.09	0.04	0.34
				AM77-39b1/Site 1	15.64	0.58	3.15	70.28	0	0.06	0.92	0.76	8.13	0.07	0.01	0.39
				AM77-39b1/Site 1	15.64	0.51	3.12	70.23	0.02	0.05	0.94	0.79	8.14	0.13	0.04	0.38
				AM77-39b1/Site 2	15.68	0.57	3.16	70.23	0	0.03	0.93	0.76	8.2	0.04	0	0.4
				AM77-39b1/Site 2	15.59	0.53	3.17	70.26	0	0.05	0.94	0.76	8.22	0.1	0.03	0.35
				AM77-39b1/Site 2	15.71	0.54	3.17	70.21	0	0.04	0.95	0.76	8.15	0.06	0.03	0.38
				AM77-39b1/Site 2	15.56	0.59	3.11	70.24	0	0.05	0.92	0.73	8.25	0.14	0.02	0.39
				AM77-39b1/Site 2	15.57	0.58	3.16	70.19	0.01	0.06	0.91	0.78	8.23	0.08	0.04	0.4
				AM77-39b1	15.627	0.55	3.144	70.246	0.004	0.05	0.934	0.76	8.195	0.088	0.024	0.378
			Spectrum 26	AM77-39b2/Site 1	15.78	0.55	3.08	70.89	0	0.06	1.01	0.5	7.6	0.08	0	0.45
			Spectrum 27	AM77-39b2/Site 1	16.17	0.55	3.09	70.59	0	0.06	1.09	0.48	7.52	0.04	0.05	0.37
			Spectrum 28	AM77-39b2/Site 1	15.36	0.6	3.17	70.81	0.02	0.02	0.97	0.53	7.89	0.11	0.08	0.45
			Spectrum 29	AM77-39b2/Site 1	15.87	0.55	3.13	70.64	0.01	0.08	0.99	0.52	7.66	0.1	0.01	0.42
			Spectrum 30	AM77-39b2/Site 1	15.62	0.6	3.12	70.85	0	0.05	1	0.51	7.73	0.11		0.41
				AM77-39b2	15.76	0.57	3.118	70.756	0.006	0.054	1.012	0.508	7.68	0.088	0.035	0.42
			Spectrum 31	AM77-39b3/Site 1	17.44	1.19	2.47	66.3	0.07	0.14	0.93	0.64	7.92	0.17	1.87	0.87
			Spectrum 32	AM77-39b3/Site 1	17.48	1.15	2.44	66.34	0.06	0.15	0.91	0.64	7.86	0.16	1.91	0.9
			Spectrum 33	AM77-39b3/Site 1	17.3	1.11	2.42	66.39	0.07	0.17	0.9	0.64	7.99	0.16	1.98	0.86
			Spectrum 34	AM77-39b3/Site 1	17.42	1.13	2.45	66.33	0.06	0.15	0.96	0.61	7.94	0.15	1.88	0.9
			Spectrum 35	AM77-39b3/Site 1	17.44	1.2	2.4	66.31	0.1	0.15	0.92	0.65	7.95	0.13	1.86	0.9
				AM77-39b3	17.416	1.156	2.436	66.334	0.072	0.152	0.924	0.636	7.932	0.154	1.9	0.886
			Spectrum 43	AM77-39c1/Site 1	17.01	0.97	2.44	67.42	0.06	0.13	0.85	0.65	8.23	0.16	1.25	0.85
			Spectrum 44	AM77-39c1/Site 1	16.98	0.99	2.41	67.42	0.04	0.15	0.86	0.66	8.17	0.16	1.39	0.77
			Spectrum 45	AM77-39c1/Site 1	16.96	1	2.4	67.52	0.05	0.14	0.86	0.62	8.2	0.15	1.26	0.83
			Spectrum 46	AM77-39c1/Site 1	17.04	0.98	2.45	67.38	0.01	0.16	0.84	0.68	8.22	0.15	1.27	0.82
			Spectrum 47	AM77-39c1/Site 1	16.85	1	2.42	67.43		0.13	0.88	0.64	8.18	0.19	1.46	0.82
				AM77-39c1	16.968	0.988	2.424	67.434	0.04	0.142	0.858	0.65	8.2	0.162	1.326	0.818
			Spectrum 49	AM77-39c2/Site 1	15.48	0.85	2.92	69.27	0.12	0.07	0.94	0.78	8.92	0.09	0.01	0.54
			Spectrum 50	AM77-39c2/Site 1	15.38	0.86	2.96	69.46	0.07	0.06	0.91	0.76	8.96	0.06	0.05	0.47
			Spectrum 51	AM77-39c2/Site 1	15.37	0.9	2.9	69.47	0.11	0.06	0.91	0.81	8.91	0.07	0	0.48
			Spectrum 52	AM77-39c2/Site 1	15.35	0.85	3.01	69.19	0.08	0.08	0.94	0.78	9.06	0.1	0.04	0.51
			Spectrum 53	AM77-39c2/Site 1	15.37	0.83	2.99	69.31	0.07	0.07	0.94	0.78	8.97	0.12	0.09	0.45
				AM77-39c2	15.39	0.858	2.956	69.34	0.09	0.068	0.928	0.782	8.964	0.088	0.038	0.49
			Spectrum 54	AM77-39c3/Site 1	14.25	0.72	2.89	68.63	0.09	0.05	0.64	0.72	11.43	0.1	0.04	0.46
			Spectrum 55	AM77-39c3/Site 1	14.23	0.64	2.88	68.61	0.1	0.05	0.67	0.78	11.41	0.1	0.05	0.47
			Spectrum 56	AM77-39c3/Site 1	14.38	0.65	2.86	68.48		0.08	0.62	0.74	11.59	0.14		0.46
			Spectrum 57	AM77-39c3/Site 1	14.33	0.72	2.88	68.4	0.15	0.06	0.63	0.74	11.4	0.18	0.05	0.46
			Spectrum 58	AM77-39c3/Site 1	14.26	0.65	2.92	68.59	0.13	0.06	0.63	0.76	11.44	0.11	0.03	0.42
				AM77-39c3	14.29	0.676	2.886	68.542	0.1175	0.06	0.638	0.748	11.454	0.126	0.0425	0.454

## Sheet: Bulk analysis (6)
		Spectrum Label	Project Path	Na	Mg	Al	Si	P	S	Cl	K	Ca	Ti	Mn	Fe				Project Path	Na2O	MgO	Al2O3	SiO2	P2O5	SO3	Cl	K2O	CaO	TiO2	MnO	FeO
																			AM77-53d	18.302	0.954	2.168	65.616	0.054	0.176	0.892	0.638	8.238	0.164	1.928	0.87
		Spectrum 12	AM77-53d/Site 1	18.35	0.97	2.19	65.59	0.07	0.18	0.87	0.65	8.23	0.14	1.95	0.81				AM77-53b1	17.706	1.134	2.554	66.652	0.138	0.178	0.83	0.864	7.326	0.162	1.598	0.864
		Spectrum 13	AM77-53d/Site 1	18.29	0.93	2.14	65.64	0.03	0.18	0.91	0.64	8.2	0.21	1.92	0.91				AM77-53b2	13.09	0.503333	2.965	74.95	0.0183333	0.025	0.831667	0.508333	6.655	0.0833333	0.0233333	0.346667
		Spectrum 14	AM77-53d/Site 1	18.29	0.99	2.14	65.55	0.07	0.18	0.88	0.63	8.26	0.15	1.95	0.9				AM77-53b3	13.002	0.498	2.964	75.05	0.012	0.03	0.856	0.488	6.65	0.084	0.028	0.338
		Spectrum 15	AM77-53d/Site 1	18.36	0.94	2.17	65.63	0.03	0.19	0.9	0.62	8.22	0.2	1.87	0.88				AM77-60a1	13.596	0.694	2.994	72.124	0.034	0.062	0.852	0.668	8.01	0.124	0.026	0.814
		Spectrum 16	AM77-53d/Site 1	18.22	0.94	2.2	65.67	0.07	0.15	0.9	0.65	8.28	0.12	1.95	0.85				AM77-60a2	14.7125	0.79	3.13875	70.5513	0.01125	0.03	0.9375	0.44	8.895	0.08875	0.0175	0.38375
																			AM77-60a2	15.815	0.7775	3.01	68.4675	0.0075	0.0575	0.9725	0.425	9.945	0.085	0.0225	0.4175
			AM77-53d	18.302	0.954	2.168	65.616	0.054	0.176	0.892	0.638	8.238	0.164	1.928	0.87				AM77-60a3	14.666	0.648	3.184	71.628	0.008	0.078	0.81	0.486	7.942	0.094	0.018	0.43
																			AM77-60a4/	15.862	0.674	3.236	69.016	0.004	0.074	0.85	0.47	9.188	0.106	0.026	0.498
		Spectrum 20	AM77-53b1/Site 1	17.77	1.14	2.56	66.6	0.15	0.18	0.85	0.86	7.29	0.16	1.55	0.88				AM77-60a5	14.864	1.148	3.194	67.504	0.014	0.064	0.926	0.414	11.288	0.11	0.024	0.45
		Spectrum 21	AM77-53b1/Site 1	17.77	1.13	2.54	66.61	0.12	0.19	0.84	0.88	7.31	0.16	1.58	0.87				AM77-60a6	13.816	0.892	3.078	72.204	0.008	0.076	0.736	0.446	8.222	0.076	0.032	0.418
		Spectrum 22	AM77-53b1/Site 1	17.72	1.09	2.6	66.76	0.14	0.16	0.83	0.87	7.34	0.17	1.48	0.85
		Spectrum 23	AM77-53b1/Site 1	17.72	1.14	2.56	66.71	0.11	0.19	0.83	0.84	7.28	0.13	1.65	0.86
		Spectrum 24	AM77-53b1/Site 1	17.55	1.17	2.51	66.58	0.17	0.17	0.8	0.87	7.41	0.19	1.73	0.86
			AM77-53b1	17.706	1.134	2.554	66.652	0.138	0.178	0.83	0.864	7.326	0.162	1.598	0.864
		Spectrum 25	AM77-53b2/Site 1	13.15	0.45	2.99	74.97	0	0.05	0.84	0.51	6.63	0.07	0.01	0.32
		Spectrum 26	AM77-53b2/Site 1	13.13	0.5	2.97	74.96	0	0.02	0.86	0.5	6.62	0.09	0.02	0.34
		Spectrum 27	AM77-53b2/Site 1	13.16	0.47	2.99	74.94	0.02	0.01	0.85	0.51	6.59	0.07	0.03	0.35
		Spectrum 28	AM77-53b2/Site 1	13.11	0.54	2.95	74.95	0.04	0.01	0.78	0.51	6.65	0.09	0.02	0.34
		Spectrum 29	AM77-53b2/Site 1	13.09	0.54	2.94	74.88	0.05	0.04	0.83	0.51	6.67	0.07	0.05	0.34
		Spectrum 30	AM77-53b2/Site 1	12.9	0.52	2.95	75	0	0.02	0.83	0.51	6.77	0.11	0.01	0.39
			AM77-53b2	13.09	0.503333	2.965	74.95	0.0183333	0.025	0.831667	0.508333	6.655	0.0833333	0.0233333	0.346667
		Spectrum 33	AM77-53b3/Site 1	12.97	0.51	3	75.07	0	0.02	0.87	0.48	6.64	0.05	0.01	0.38
		Spectrum 34	AM77-53b3/Site 1	12.97	0.49	2.95	75.16	0	0.02	0.86	0.47	6.64	0.08	0.03	0.32
		Spectrum 35	AM77-53b3/Site 1	13.07	0.5	2.94	75.03	0.05	0.03	0.86	0.49	6.61	0.08	0.02	0.32
		Spectrum 36	AM77-53b3/Site 1	13.09	0.51	2.92	74.94	0.01	0.03	0.84	0.5	6.68	0.1	0.04	0.34
		Spectrum 37	AM77-53b3/Site 1	12.91	0.48	3.01	75.05	0	0.05	0.85	0.5	6.68	0.11	0.04	0.33
			AM77-53b3	13.002	0.498	2.964	75.05	0.012	0.03	0.856	0.488	6.65	0.084	0.028	0.338
		Spectrum 50	AM77-60a1/Site 1	13.58	0.7	2.98	72.09	0.02	0.06	0.87	0.65	8.04	0.13	0.03	0.84
		Spectrum 51	AM77-60a1/Site 1	13.58	0.7	3.01	72.08	0.06	0.05	0.84	0.67	8.08	0.09	0.04	0.8
		Spectrum 52	AM77-60a1/Site 1	13.66	0.65	2.99	72.03	0.03	0.06	0.85	0.69	8.06	0.13	0.04	0.81
		Spectrum 53	AM77-60a1/Site 1	13.56	0.69	3.02	72.23	0.03	0.07	0.85	0.64	7.92	0.14	0.02	0.83
		Spectrum 54	AM77-60a1/Site 1	13.6	0.73	2.97	72.19	0.03	0.07	0.85	0.69	7.95	0.13	0	0.79
			AM77-60a1	13.596	0.694	2.994	72.124	0.034	0.062	0.852	0.668	8.01	0.124	0.026	0.814
		Spectrum 55	AM77-60a2/Site 1	14.79	0.78	3.13	70.58	0.01	0.02	0.94	0.45	8.84	0.08	0	0.37
		Spectrum 56	AM77-60a2/Site 1	14.66	0.78	3.13	70.62	0	0.05	0.92	0.46	8.84	0.13	0.01	0.4
		Spectrum 59	AM77-60a2/Site 1	14.65	0.8	3.18	70.63	0	0.02	0.93	0.42	8.97	0.07	0.01	0.33
		Spectrum 60	AM77-60a2/Site 1	14.72	0.81	3.12	70.54	0	0.03	0.95	0.42	8.91	0.09	0.04	0.36
		Spectrum 61	AM77-60a2/Site 2	14.78	0.8	3.09	70.54	0.02	0.03	0.95	0.45	8.85	0.07	0.03	0.39
		Spectrum 62	AM77-60a2/Site 2	14.69	0.76	3.18	70.54	0.02	0.03	0.95	0.44	8.86	0.1	0.03	0.39
		Spectrum 65	AM77-60a2/Site 2	14.66	0.78	3.15	70.49	0.02	0.03	0.92	0.44	8.94	0.11	0	0.45
		Spectrum 66	AM77-60a2/Site 2	14.75	0.81	3.13	70.47	0.02	0.03	0.94	0.44	8.95	0.06	0.02	0.38
			AM77-60a2	14.7125	0.79	3.13875	70.5513	0.01125	0.03	0.9375	0.44	8.895	0.08875	0.0175	0.38375
		Spectrum 57	AM77-60a2/Site 1	15.83	0.78	3.07	68.47	0.03	0.04	0.98	0.41	9.9	0.09	0	0.41
		Spectrum 58	AM77-60a2/Site 1	15.87	0.78	2.94	68.48	0	0.07	0.97	0.42	9.95	0.05	0.06	0.42
		Spectrum 63	AM77-60a2/Site 2	15.8	0.77	3.03	68.43	0	0.06	0.97	0.44	9.97	0.1	0.01	0.41
		Spectrum 64	AM77-60a2/Site 2	15.76	0.78	3	68.49	0	0.06	0.97	0.43	9.96	0.1	0.02	0.43
			AM77-60a2	15.815	0.7775	3.01	68.4675	0.0075	0.0575	0.9725	0.425	9.945	0.085	0.0225	0.4175
			AM77-60a3/site4	15.07	0.61	3.11	71.13	0	0.07	0.89	0.54	8.02	0.08	0	0.46
			AM77-60a3/site4	14.93	0.66	3.14	71.22	0.03	0.07	0.85	0.52	8.07	0.1	0.03	0.36
			AM77-60a3/site4	14.48	0.67	3.27	71.92	0.01	0.09	0.76	0.44	7.84	0.1	0	0.44
			AM77-60a3/site4	14.45	0.62	3.2	71.96	0	0.08	0.77	0.47	7.88	0.11	0.02	0.43
			AM77-60a3/site4	14.4	0.68	3.2	71.91	0	0.08	0.78	0.46	7.9	0.08	0.04	0.46
			AM77-60a3	14.666	0.648	3.184	71.628	0.008	0.078	0.81	0.486	7.942	0.094	0.018	0.43
			AM77-60a4/site3	15.91	0.67	3.25	68.94	0	0.09	0.85	0.47	9.24	0.1	0	0.5
			AM77-60a4/site3	15.87	0.63	3.25	68.99	0.02	0.07	0.84	0.46	9.24	0.11	0.01	0.51
			AM77-60a4/site3	15.85	0.71	3.15	68.99	0	0.08	0.87	0.47	9.18	0.12	0.06	0.52
			AM77-60a4/site3	15.84	0.69	3.28	69.01	0	0.07	0.83	0.46	9.19	0.11	0.04	0.47
			AM77-60a4/site3	15.84	0.67	3.25	69.15	0	0.06	0.86	0.49	9.09	0.09	0.02	0.49
			AM77-60a4	15.862	0.674	3.236	69.016	0.004	0.074	0.85	0.47	9.188	0.106	0.026	0.498
		Spectrum 101	AM77-60a5/Site 1	14.95	1.14	3.14	67.51	0	0.07	0.93	0.42	11.32	0.08	0	0.43
		Spectrum 102	AM77-60a5/Site 1	14.84	1.17	3.22	67.48	0.02	0.05	0.94	0.41	11.26	0.13	0.06	0.42
		Spectrum 103	AM77-60a5/Site 1	14.84	1.14	3.19	67.56	0.01	0.05	0.94	0.43	11.3	0.09	0.02	0.43
		Spectrum 104	AM77-60a5/Site 1	14.86	1.13	3.22	67.43	0.04	0.08	0.91	0.41	11.29	0.14	0.03	0.47
		Spectrum 105	AM77-60a5/Site 1	14.83	1.16	3.2	67.54	0	0.07	0.91	0.4	11.27	0.11	0.01	0.5
			AM77-60a5	14.864	1.148	3.194	67.504	0.014	0.064	0.926	0.414	11.288	0.11	0.024	0.45
		Spectrum 106	AM77-60a6/Site 1	13.85	0.91	3.04	72.2	0	0.07	0.72	0.48	8.16	0.08	0.04	0.45
		Spectrum 107	AM77-60a6/Site 1	13.83	0.87	3.08	72.27	0	0.07	0.76	0.43	8.24	0.04	0.02	0.4
		Spectrum 108	AM77-60a6/Site 1	13.8	0.89	3.1	72.12	0.04	0.08	0.72	0.44	8.26	0.09	0.02	0.43
		Spectrum 109	AM77-60a6/Site 1	13.83	0.87	3.08	72.25	0	0.08	0.76	0.42	8.18	0.11	0.02	0.4
		Spectrum 110	AM77-60a6/Site 1	13.77	0.92	3.09	72.18	0	0.08	0.72	0.46	8.27	0.06	0.06	0.41
			AM77-60a6	13.816	0.892	3.078	72.204	0.008	0.076	0.736	0.446	8.222	0.076	0.032	0.418

## Sheet: Bulk analysis (7)
		Spectrum Label	Project Path	Na	Mg	Al	Si	P	S	Cl	K	Ca	Ti	Cr	Mn	Fe	Cu			Project Path	Na2O	MgO	Al2O3	SiO2	P2O5	SO2	Cl	K2O	CaO	TiO2	Cr2O3	MnO	FeO	CuO
		Spectrum 11	AM79-23a/Site 1	13.45	0.62	3	70.21	0.2	0.06	0.86	0.6	10.3	0.09	0.19	0	0.42				AM79-23a	13.558	0.654	2.976	69.788	0.18	0.062	0.852	0.592	10.608	0.068	0.186	0.004	0.472
		Spectrum 12	AM79-23a/Site 1	13.45	0.67	2.97	69.9	0.16	0.05	0.83	0.59	10.59	0.06	0.23	0	0.5				AM79-23b	15.43	0.642	2.876	69.724	0.172	0.108	0.966	0.678	8.726	0.088	0.146	0.002	0.436
		Spectrum 13	AM79-23a/Site 1	13.92	0.64	2.94	69.8	0.16	0.07	0.89	0.58	10.36	0.06	0.16	0	0.42				AM79-534a	17.182	0.594	2.228	69.246	0.134	0.144	0.986	0.574	6.912	0.088	0.118	1.386	0.416
		Spectrum 14	AM79-23a/Site 1	13.36	0.67	3.01	69.31	0.19	0.06	0.81	0.59	11.19	0.07	0.18	0	0.56				AM79-534b	18.706	0.622	1.96	69.306	0.084	0.184	1.048	0.53	6.792	0.058	0.098	0.156	0.446
		Spectrum 15	AM79-23a/Site 1	13.61	0.67	2.96	69.72	0.19	0.07	0.87	0.6	10.6	0.06	0.17	0.02	0.46				AM79-534c	16.07	0.54	2.41	69.822	0.19	0.11	0.974	0.504	7.242	0.062	0.124	1.586	0.366
																				AM79-534d	17.998	1.124	2.94	65.408	0.114	0.158	0.922	0.53	6.454	0.538	0.112	2.078	1.624
			AM79-23a	13.558	0.654	2.976	69.788	0.18	0.062	0.852	0.592	10.608	0.068	0.186	0.004	0.472				AM79-539	16.398	1.276	3.468	65.126	0.242	0.158	0.796	0.43	5.078	0.678	0.088	1.908	4.352
																				AM79-540a	14.8	0.538	2.976	71.59	0.13	0.078	1.028	0.43	7.812	0.07	0.16	0.014	0.378
		Spectrum 31	AM79-23b/Site 1	15.38	0.64	2.86	69.86	0.17	0.12	0.98	0.68	8.65	0.09	0.12	0	0.44				AM79-540b	14.302	0.82	2.98	68.676	0.296	0.098	0.628	0.822	10.082	0.094	0.17	0.17	0.652	0.204
		Spectrum 32	AM79-23b/Site 1	15.51	0.62	2.89	69.6	0.18	0.09	0.95	0.68	8.76	0.12	0.15	0	0.44				AM79-540c	17.688	1.276	2.27	67.508	0.19	0.206	0.606	0.956	7.756	0.258	0.14	0.162	0.986
		Spectrum 33	AM79-23b/Site 1	15.5	0.7	2.81	69.74	0.15	0.12	1	0.68	8.68	0.05	0.15	0	0.42				AM79-541	16.73	0.882	2.706	67.636	0.124	0.118	1.002	0.686	7.7	0.196	0.13	1.32	0.77
		Spectrum 34	AM79-23b/Site 1	15.38	0.63	2.87	69.74	0.21	0.1	0.95	0.68	8.73	0.11	0.17	0.01	0.42				AM79-544a	15.276	0.552	2.948	69.188	0.142	0.092	1.182	0.362	8.1	0.08	0.142	1.512	0.436
		Spectrum 35	AM79-23b/Site 1	15.38	0.62	2.95	69.68	0.15	0.11	0.95	0.67	8.81	0.07	0.14	0	0.46				AM79-544b	16.054	0.676	2.802	68.44	0.15	0.116	1.046	0.478	8.278	0.106	0.15	1.15	0.55
			AM79-23b	15.43	0.642	2.876	69.724	0.172	0.108	0.966	0.678	8.726	0.088	0.146	0.002	0.436
		Spectrum 36	AM79-534a/Site 1	17.17	0.62	2.17	69.32	0.1	0.15	0.98	0.56	6.93	0.09	0.14	1.39	0.38
		Spectrum 37	AM79-534a/Site 1	17.25	0.56	2.24	69.24	0.12	0.15	0.98	0.55	6.92	0.08	0.12	1.35	0.45
		Spectrum 38	AM79-534a/Site 1	17.15	0.59	2.31	69.21	0.13	0.13	1	0.59	6.91	0.09	0.09	1.42	0.39
		Spectrum 39	AM79-534a/Site 1	17.17	0.58	2.2	69.3	0.21	0.14	0.99	0.59	6.89	0.09	0.11	1.34	0.39
		Spectrum 40	AM79-534a/Site 1	17.17	0.62	2.22	69.16	0.11	0.15	0.98	0.58	6.91	0.09	0.13	1.43	0.47
			AM79-534a	17.182	0.594	2.228	69.246	0.134	0.144	0.986	0.574	6.912	0.088	0.118	1.386	0.416
		Spectrum 41	AM79-534b/Site 1	18.73	0.62	1.99	69.3	0.07	0.18	1.04	0.52	6.76	0.08	0.08	0.15	0.48
		Spectrum 42	AM79-534b/Site 1	18.72	0.61	1.95	69.16	0.13	0.18	1.06	0.52	6.85	0.06	0.11	0.19	0.46
		Spectrum 43	AM79-534b/Site 1	18.74	0.63	1.95	69.37	0.09	0.17	1.01	0.51	6.78	0.05	0.05	0.17	0.45
		Spectrum 44	AM79-534b/Site 1	18.66	0.65	1.98	69.38	0.05	0.2	1.06	0.53	6.76	0.03	0.12	0.13	0.44
		Spectrum 45	AM79-534b/Site 1	18.68	0.6	1.93	69.32	0.08	0.19	1.07	0.57	6.81	0.07	0.13	0.14	0.4
			AM79-534b	18.706	0.622	1.96	69.306	0.084	0.184	1.048	0.53	6.792	0.058	0.098	0.156	0.446
		Spectrum 50	AM79-534c/Site 1	16.03	0.55	2.41	69.76	0.23	0.12	0.98	0.51	7.29	0.03	0.12	1.61	0.37
		Spectrum 51	AM79-534c/Site 1	15.98	0.54	2.45	69.95	0.16	0.11	0.96	0.52	7.23	0.09	0.14	1.56	0.31
		Spectrum 52	AM79-534c/Site 1	16.16	0.54	2.4	69.72	0.2	0.11	0.97	0.46	7.21	0.1	0.15	1.59	0.39
		Spectrum 53	AM79-534c/Site 1	16.14	0.55	2.4	69.78	0.2	0.11	0.97	0.52	7.22	0.05	0.07	1.61	0.39
		Spectrum 54	AM79-534c/Site 1	16.04	0.52	2.39	69.9	0.16	0.1	0.99	0.51	7.26	0.04	0.14	1.56	0.37
			AM79-534c	16.07	0.54	2.41	69.822	0.19	0.11	0.974	0.504	7.242	0.062	0.124	1.586	0.366
		Spectrum 55	AM79-534d/Site 1	17.94	1.11	2.96	65.48	0.11	0.15	0.93	0.54	6.43	0.57	0.09	2.1	1.58
		Spectrum 56	AM79-534d/Site 1	17.99	1.16	2.94	65.36	0.08	0.18	0.91	0.55	6.46	0.55	0.09	2.14	1.6
		Spectrum 57	AM79-534d/Site 1	18.04	1.11	2.9	65.37	0.15	0.16	0.94	0.53	6.44	0.5	0.17	2.05	1.66
		Spectrum 58	AM79-534d/Site 1	18	1.09	2.95	65.38	0.13	0.15	0.93	0.51	6.49	0.56	0.1	2.07	1.62
		Spectrum 59	AM79-534d/Site 1	18.02	1.15	2.95	65.45	0.1	0.15	0.9	0.52	6.45	0.51	0.11	2.03	1.66
			AM79-534d	17.998	1.124	2.94	65.408	0.114	0.158	0.922	0.53	6.454	0.538	0.112	2.078	1.624
		Spectrum 60	AM79-539/Site 1	16.38	1.24	3.51	65.13	0.25	0.15	0.79	0.42	5.06	0.67	0.1	1.93	4.37
		Spectrum 61	AM79-539/Site 1	16.35	1.3	3.44	65.22	0.23	0.15	0.79	0.46	5.03	0.69	0.09	1.93	4.31
		Spectrum 62	AM79-539/Site 1	16.42	1.26	3.46	65.14	0.25	0.15	0.77	0.4	5.1	0.64	0.09	1.9	4.42
		Spectrum 63	AM79-539/Site 1	16.43	1.31	3.46	65.05	0.24	0.18	0.82	0.42	5.12	0.67	0.06	1.88	4.36
		Spectrum 64	AM79-539/Site 1	16.41	1.27	3.47	65.09	0.24	0.16	0.81	0.45	5.08	0.72	0.1	1.9	4.3
			AM79-539	16.398	1.276	3.468	65.126	0.242	0.158	0.796	0.43	5.078	0.678	0.088	1.908	4.352
		Spectrum 65	AM79-540a/Site 1	14.88	0.54	3.01	71.41	0.16	0.08	1.04	0.42	7.86	0.08	0.17	0	0.36
		Spectrum 66	AM79-540a/Site 1	14.82	0.54	3.03	71.57	0.11	0.06	1.04	0.43	7.79	0.06	0.17	0	0.38
		Spectrum 67	AM79-540a/Site 1	14.83	0.56	2.94	71.57	0.13	0.08	1.02	0.44	7.83	0.04	0.16	0.03	0.38
		Spectrum 68	AM79-540a/Site 1	14.77	0.52	2.98	71.71	0.12	0.07	1.02	0.41	7.76	0.08	0.13	0.02	0.4
		Spectrum 69	AM79-540a/Site 1	14.7	0.53	2.92	71.69	0.13	0.1	1.02	0.45	7.82	0.09	0.17	0.02	0.37
			AM79-540a	14.8	0.538	2.976	71.59	0.13	0.078	1.028	0.43	7.812	0.07	0.16	0.014	0.378
		Spectrum 70	AM79-540b/Site 1	14.33	0.82	2.99	68.55	0.34	0.09	0.61	0.82	10.15	0.09	0.14	0.19	0.65	0.2
		Spectrum 71	AM79-540b/Site 1	14.29	0.86	2.94	68.71	0.27	0.1	0.62	0.84	10.02	0.13	0.17	0.17	0.65	0.22
		Spectrum 72	AM79-540b/Site 1	14.3	0.78	2.97	68.72	0.28	0.11	0.64	0.81	10.15	0.09	0.19	0.16	0.66	0.17
		Spectrum 73	AM79-540b/Site 1	14.32	0.83	2.99	68.64	0.29	0.09	0.63	0.84	10.05	0.08	0.17	0.18	0.67	0.2
		Spectrum 74	AM79-540b/Site 1	14.27	0.81	3.01	68.76	0.3	0.1	0.64	0.8	10.04	0.08	0.18	0.15	0.63	0.23
			AM79-540b	14.302	0.82	2.98	68.676	0.296	0.098	0.628	0.822	10.082	0.094	0.17	0.17	0.652	0.204
		Spectrum 75	AM79-540c/Site 1	17.24	1.3	2.19	68.17	0.19	0.21	0.6	1.03	7.39	0.26	0.14	0.3	0.98
		Spectrum 76	AM79-540c/Site 1	17.86	1.26	2.31	67.29	0.19	0.22	0.6	0.92	7.87	0.23	0.12	0.13	1.01
		Spectrum 77	AM79-540c/Site 1	17.87	1.24	2.33	67.32	0.19	0.2	0.59	0.94	7.77	0.27	0.16	0.16	0.96
		Spectrum 78	AM79-540c/Site 1	17.54	1.31	2.3	67.26	0.18	0.2	0.61	0.94	8.12	0.28	0.15	0.09	1.01
		Spectrum 79	AM79-540c/Site 1	17.93	1.27	2.22	67.5	0.2	0.2	0.63	0.95	7.63	0.25	0.13	0.13	0.97
			AM79-540c	17.688	1.276	2.27	67.508	0.19	0.206	0.606	0.956	7.756	0.258	0.14	0.162	0.986
		Spectrum 86	AM79-541/Site 1	16.68	0.88	2.72	67.61	0.09	0.13	0.99	0.68	7.71	0.2	0.12	1.42	0.76
		Spectrum 87	AM79-541/Site 1	16.71	0.89	2.69	67.74	0.09	0.13	1	0.71	7.71	0.18	0.12	1.27	0.75
		Spectrum 88	AM79-541/Site 1	16.72	0.91	2.73	67.56	0.16	0.11	1.01	0.69	7.73	0.22	0.12	1.26	0.79
		Spectrum 89	AM79-541/Site 1	16.81	0.87	2.71	67.45	0.19	0.1	1.03	0.7	7.65	0.22	0.18	1.32	0.77
		Spectrum 90	AM79-541/Site 1	16.73	0.86	2.68	67.82	0.09	0.12	0.98	0.65	7.7	0.16	0.11	1.33	0.78
			AM79-541	16.73	0.882	2.706	67.636	0.124	0.118	1.002	0.686	7.7	0.196	0.13	1.32	0.77
		Spectrum 91	AM79-544a/Site 1	15.27	0.57	2.97	69.21	0.14	0.09	1.17	0.36	8.1	0.09	0.12	1.48	0.44
		Spectrum 92	AM79-544a/Site 1	15.36	0.54	2.9	69.07	0.16	0.08	1.19	0.34	8.11	0.13	0.16	1.49	0.47
		Spectrum 93	AM79-544a/Site 1	15.2	0.57	2.94	69.34	0.16	0.08	1.17	0.36	8.05	0.05	0.17	1.51	0.42
		Spectrum 94	AM79-544a/Site 1	15.37	0.55	2.98	69.07	0.12	0.11	1.18	0.37	8.13	0.06	0.13	1.52	0.44
		Spectrum 95	AM79-544a/Site 1	15.18	0.53	2.95	69.25	0.13	0.1	1.2	0.38	8.11	0.07	0.13	1.56	0.41
			AM79-544a	15.276	0.552	2.948	69.188	0.142	0.092	1.182	0.362	8.1	0.08	0.142	1.512	0.436
		Spectrum 96	AM79-544b/Site 1	16	0.66	2.84	68.55	0.15	0.12	1.05	0.48	8.24	0.07	0.16	1.12	0.57
		Spectrum 97	AM79-544b/Site 1	15.96	0.7	2.78	68.45	0.14	0.14	1.07	0.45	8.33	0.12	0.17	1.15	0.55
		Spectrum 98	AM79-544b/Site 1	15.96	0.67	2.81	68.54	0.15	0.1	1.07	0.47	8.3	0.15	0.11	1.16	0.51
		Spectrum 99	AM79-544b/Site 1	16.17	0.68	2.83	68.33	0.15	0.11	1.01	0.49	8.26	0.09	0.15	1.13	0.58
		Spectrum 100	AM79-544b/Site 1	16.18	0.67	2.75	68.33	0.16	0.11	1.03	0.5	8.26	0.1	0.16	1.19	0.54
			AM79-544b	16.054	0.676	2.802	68.44	0.15	0.116	1.046	0.478	8.278	0.106	0.15	1.15	0.55

[truncated: 6 more sheets: Bulk analysis (8), Bulk analysis (9), Bulk analysis (10), % oxides, ppm element, ref mat]
